# Supplementary material for: Cytoplasmic RBMX coordinates selective mRNA translation to suppress senescence in cancer
Source: Research Square preprint supplement (doi:10.21203/rs.3.rs-8859405/v1), 2026-02-24
Supplement: Supplementary file 2 [file c79d5f2a12e667b371e56b2c.xlsx]

## Sheet: Supplementary Table S1
Supplementary Table S1 Mass spectrometry analysis of cytoplasmic RBMX-interacting proteins.
No.	Protein name	Gene Symbol	Peptide seq.	mass (Da)	Flag-vec.	Flag-RBMX
					Score
1	HUMAN eIF4G1 protein	EIF4G1	R.TASTPTPPQTGGGLEPQANGETPQVAVIVRPDDR.S	176807	0	53
2	HUMAN Isoform 2 of Heat shock 70 kDa protein 1A	HSPA1A	R.IINEPTAAAIAYGLDR.T	64183	160	143
3	HUMAN Protein arginine N-methyltransferase 5	PRMT5	R.VSSGRDLNCVPEIADTLGAVAK.Q	73348	36	133
4	HUMAN Polyadenylate-binding protein	PABPC1	R.SLGYAYVNFQQPADAER.A	70854	0	129
5	HUMAN Cell cycle and apoptosis regulator protein 2	CCAR2	K.AAEAAPPTQEAQGETEPTEQAPDALEQAADTSRR.N	103465	0	64
6	HUMAN Eukaryotic translation initiation factor 3 subunit B	EIF3B	K.GTQGVVTNFEIFR.M	92823	0	45
7	HUMAN Heat shock cognate 71 kDa protein	HSPA8	K.DAGTIAGLNVLR.I	68166	93	44
8	HUMAN Eukaryotic translation initiation factor 3 subunit C	EIF3C	R.TEPTAQQNLALQLAEK.L	105962	0	41
9	HUMAN Heterogeneous nuclear ribonucleoprotein U	HNRNPU	K.SSGPTSLFAVTVAPPGAR.Q	89061	0	40
10	HUMAN Y-box-binding protein 1	YBX1	R.SVGDGETVEFDVVEGEK.G	42333	0	151
11	HUMAN Cold shock domain protein A	CSDA	R.SVGDGETVEFDVVEGEKGAEAANVTGPDGVPVEGSR.Y	40066	0	146
12	HUMAN Testis tissue sperm-binding protein Li 44a	WDR77	R.SDGALLLGASSLSGR.C	37442	0	132
13	HUMAN RNA-binding motif protein, X chromosome	RBMX	R.GFAFVTFESPADAKDAAR.D	42306	0	97
14	HUMAN Heterogeneous nuclear ribonucleoproteins C1/C2	HNRNPC	R.MIAGQVLDINLAAEPK.V	31986	0	64
15	HUMAN Heterogeneous nuclear ribonucleoprotein H	HNRNPH1	R.STGEAFVQFASQEIAEK.A	47343	0	55
16	HUMAN Eukaryotic initiation factor 4A-I	EIF4A1	R.VLITTDLLAR.G	46353	21	55
17	HUMAN Tubulin beta-8 chain	TUBB8	R.AVLVDLEPGTMDSVR.S	50257	44	47
18	HUMAN Methylosome subunit pICln	CLNS1A	R.QQPDTEAVLNGKGLGTGTLYIAESR.L	22505	40	95
19	HUMAN Ribosomal protein L7	RPL7	R.IALTDNALIAR.S	30476	0	63
20	HUMAN 40S ribosomal protein S8	RPS8	R.IIDVVYNASNNELVR.T	24475	0	61
21	HUMAN Complement component 1 Q subcomponent-binding protein	C1QBP	.MSGGWELELNGTEAK.L	20179	0	60
22	HUMAN Mitochondrial ribosomal protein L4	MRPL4	R.ATENPEQVASEGLPEPVLR.K	34954	0	55
23	HUMAN Receptor of-activated protein C kinase 1	RACK1	K.DVLSVAFSSDNR.Q	35511	0	42
	Ions score is -10*Log(P), where P is the probability that the observed match is a random event.
	Individual ions scores > 40 indicate identity or extensive homology (p<0.05).
	Protein scores are derived from ions scores as a non-probabilistic basis for ranking protein hits.

## Sheet: Supplementary Table S2
Supplementary Table S2. Transcripts identified by RIP-seq as interacting with cytoplasmic RBMX
		FPKM												Flag-RBMX RIP-DEG																														FPKM_input			FPKM_RIP
test_id	locus	F-vec-Input-1	F-vec-Input-2	F-vec-Input-3	F-RBMX-Input-1	F-RBMX-Input-2	F-RBMX-Input-3	F-vec-RIP-1	F-vec-RIP-2	F-vec-RIP-3	F-RBMX-RIP-1	F-RBMX-RIP-2	F-RBMX-RIP-3	sample_1	sample_2	status	F-vec-RIP	F-RBMX-RIP	log2(fold_change)	absolute fold change	test_stat	p_value	q_value(FDR)	significant	# feature	class	assembly	assembly_unit	seq_type	chromosome	genomic_accession	start	end	strand	product_accession	non-redundant_refseq	related_accession	name	GeneID	locus_tag	feature_interval_length	product_length	attributes	F-vec(aver)	F-RBMX(aver)	F-RBMX(aver) / F-vec.(aver)	F-vec(aver)	F-RBMX(aver)	F-RBMX(aver) / F-vec.(aver)
RNR2	NC_012920.1:1670-3229	41725.5	40089	38937	18752.2	42759.6	22134.6	6390.66	7843.73	5426.61	80034	75406.3	68928.7	F-vec-RIP-1,F-vec-RIP-2,F-vec-RIP-3	F-RBMX-RIP-1,F-RBMX-RIP-2,F-RBMX-RIP-3	OK	6553.67	74789.7	3.5122638326742877	11.410292203879065	0.711344	0.014	0.03423	yes	rRNA	---	GCF_000001405.39	non-nuclear	mitochondrion	MT	NC_012920.1	1671.0	3229.0	+	---	---	---	l-rRNA	4550.0	---	1559.0	---	---	40250.5	27882.1	0.692715	6553.67	74789.7	11.4119
SNX29P1-2	NW_017852933.1:173043-209599	0.415868	0.250857	0.317162	0	0.307972	0.190598	0.529473	0.494169	0.638382	1.48113	1.51304	2.45849	F-vec-RIP-1,F-vec-RIP-2,F-vec-RIP-3	F-RBMX-RIP-1,F-RBMX-RIP-2,F-RBMX-RIP-3	OK	0.554008	1.81755	0.858447281838789	1.8130859043196688	3.3429	5e-05	0.000226292	yes	---	---	---	---	---	---	---	---	---	---	---	---	---	---	---	---	---	---	---	0.327962	0.16619	0.506735	0.554008	1.81755	3.28073
LOC100190986-2	NW_017852933.1:254761-257214	1.31928	1.26098	1.4561	1.6526	1.44429	1.26372	0.218105	0.0706843	0.151701	0.839975	0.953128	0.876564	F-vec-RIP-1,F-vec-RIP-2,F-vec-RIP-3	F-RBMX-RIP-1,F-RBMX-RIP-2,F-RBMX-RIP-3	OK	0.14683	0.889889	0.7206499525120036	1.6479242782278107	4.63266	5e-05	0.000226292	yes	---	---	---	---	---	---	---	---	---	---	---	---	---	---	---	---	---	---	---	1.34545	1.45354	1.08033	0.14683	0.889889	6.06067
LOC100505915-2	NW_017852933.1:1679393-1703918	3.15861	3.33033	3.29922	2.05649	2.17558	2.01966	2.37537	2.56799	1.77343	7.14573	6.86455	7.52767	F-vec-RIP-1,F-vec-RIP-2,F-vec-RIP-3	F-RBMX-RIP-1,F-RBMX-RIP-2,F-RBMX-RIP-3	OK	2.23893	7.17932	1.3364636187070182	2.525315459117672	7.08507	5e-05	0.000226292	yes	---	---	---	---	---	---	---	---	---	---	---	---	---	---	---	---	---	---	---	3.26272	2.08391	0.638703	2.23893	7.17932	3.20658
LOC100288203-2	NW_011332701.1:2648431-2667594	0.48038	0.484138	0.553209	0.439987	0.516964	0.453917	0.497195	0.6936	0.816711	2.6712	2.51997	2.2807	F-vec-RIP-1,F-vec-RIP-2,F-vec-RIP-3	F-RBMX-RIP-1,F-RBMX-RIP-2,F-RBMX-RIP-3	OK	0.669169	2.49062	1.0643532770028605	2.091232223938978	5.53067	5e-05	0.000226292	yes	---	---	---	---	---	---	---	---	---	---	---	---	---	---	---	---	---	---	---	0.505909	0.470289	0.929593	0.669169	2.49062	3.72197
CDC27P11	NC_000021.9:8466839-8470663	0.659724	0.70799	0.677652	0.326897	0.431753	0.438043	0.372667	0.397812	0.521406	0.905416	0.88029	1.11043	F-vec-RIP-1,F-vec-RIP-2,F-vec-RIP-3	F-RBMX-RIP-1,F-RBMX-RIP-2,F-RBMX-RIP-3	OK	0.430628	0.965378	0.45815822877440004	1.3737868963839655	3.59314	5e-05	0.000226292	yes	misc_RNA	---	GCF_000001405.39	Primary Assembly	chromosome	21	NC_000021.9	8466840.0	8470663.0	-	XR_430344.3	---	---	cell division cycle 27 pseudogene 11	102723603.0	---	3824.0	3824.0	pseudo	0.681789	0.398898	0.585075	0.430628	0.965379	2.24179
LSM14A-2	NW_003315963.1:20244-77036	0.194343	0.180034	0.266993	0.0912107	0.345435	0.161074	0.125654	0.194412	0.163848	0.478782	0.57526	0.577166	F-vec-RIP-1,F-vec-RIP-2,F-vec-RIP-3	F-RBMX-RIP-1,F-RBMX-RIP-2,F-RBMX-RIP-3	OK	0.161304	0.543736	0.41068037039085226	1.3293125658742242	2.28687	5e-05	0.000226292	yes	---	---	---	---	---	---	---	---	---	---	---	---	---	---	---	---	---	---	---	0.21379	0.19924	0.931942	0.161305	0.543736	3.37086
RNR1	NC_012920.1:647-1601	29458.6	31713.8	38475.6	23104.4	32730.5	19179.3	8988.19	9661.5	4371.25	26116.8	15124.2	21226.2	F-vec-RIP-1,F-vec-RIP-2,F-vec-RIP-3	F-RBMX-RIP-1,F-RBMX-RIP-2,F-RBMX-RIP-3	OK	7673.65	20822.4	1.4400327845740861	2.7132703120012	2.18038	0.00105	0.00355865	yes	rRNA	---	GCF_000001405.39	non-nuclear	mitochondrion	MT	NC_012920.1	648.0	1601.0	+	---	---	---	s-rRNA	4549.0	---	954.0	---	---	33216	25004.7	0.752792	7673.65	20822.4	2.71349
DHRS4L2-2	NW_018654722.1:270854-312739	0.293393	0.0681011	0.0863299	0.0513563	0.0837943	0.181961	0.258652	0.219884	0.0372373	0.322734	0.516614	0.421665	F-vec-RIP-1,F-vec-RIP-2,F-vec-RIP-3	F-RBMX-RIP-1,F-RBMX-RIP-2,F-RBMX-RIP-3	OK	0.171924	0.420338	0.27735527780240093	1.2119710834490975	1.34805	0.00675	0.0182262	yes	---	---	---	---	---	---	---	---	---	---	---	---	---	---	---	---	---	---	---	0.149275	0.105704	0.708117	0.171924	0.420338	2.4449
LOC101929703	NC_000001.11:155569479-155571782	0.476529	0.231777	0.242407	0.21712	0.504043	0.127915	0.248981	0.170196	0.22325	0.687526	0.428764	0.786028	F-vec-RIP-1,F-vec-RIP-2,F-vec-RIP-3	F-RBMX-RIP-1,F-RBMX-RIP-2,F-RBMX-RIP-3	OK	0.214142	0.634106	0.4285644083256374	1.345893643412385	2.97084	0.00015	0.000620904	yes	misc_RNA	---	GCF_000001405.39	Primary Assembly	chromosome	1	NC_000001.11	155569480.0	155571782.0	+	XR_002958367.1	---	---	uncharacterized LOC101929703	101929703.0	---	2303.0	2303.0	pseudo	0.316904	0.283026	0.893096	0.214142	0.634106	2.96114
FAM66D-2	NT_187570.1:38930-39635	0.280378	0.32726	0.274807	0.484158	0.534	0.216117	0.617677	0.523915	0.161559	1.61873	1.76888	2.21922	F-vec-RIP-1,F-vec-RIP-2,F-vec-RIP-3	F-RBMX-RIP-1,F-RBMX-RIP-2,F-RBMX-RIP-3	OK	0.434384	1.86894	1.0000864957042455	2.000119912101641	2.93275	0.0001	0.000428757	yes	---	---	---	---	---	---	---	---	---	---	---	---	---	---	---	---	---	---	---	0.294148	0.411425	1.3987	0.434384	1.86894	4.30252
LRRC37A3-3	NT_187663.1:193049-287327	0.41446	0.456685	0.477698	0.290127	0.356802	0.436619	0.19724	0.232786	0.241973	0.557936	0.501072	0.538533	F-vec-RIP-1,F-vec-RIP-2,F-vec-RIP-3	F-RBMX-RIP-1,F-RBMX-RIP-2,F-RBMX-RIP-3	OK	0.224	0.532513	0.32429575402969024	1.2520531045751633	3.60278	5e-05	0.000226292	yes	---	---	---	---	---	---	---	---	---	---	---	---	---	---	---	---	---	---	---	0.449614	0.361183	0.803317	0.224	0.532514	2.3773
LOC105374996-2	NT_113891.3:128392-144314	0.257257	0.877142	0.554215	0.178356	0.586531	0.635336	1.35851	1.59251	1.30208	3.14084	3.84099	3.02944	F-vec-RIP-1,F-vec-RIP-2,F-vec-RIP-3	F-RBMX-RIP-1,F-RBMX-RIP-2,F-RBMX-RIP-3	OK	1.4177	3.33709	0.8430921421638833	1.7938908880340818	3.23986	5e-05	0.000226292	yes	---	---	---	---	---	---	---	---	---	---	---	---	---	---	---	---	---	---	---	0.562871	0.466741	0.829214	1.4177	3.33709	2.35388
LOC102723360-2	NW_021160023.1:261162-284267	0.35129	0.385675	0.308352	0.129935	0.422422	0.191407	0.228222	0.257521	0.212618	0.42479	0.371746	0.55782	F-vec-RIP-1,F-vec-RIP-2,F-vec-RIP-3	F-RBMX-RIP-1,F-RBMX-RIP-2,F-RBMX-RIP-3	OK	0.232787	0.451452	0.23557330882820066	1.177374518063542	1.76764	0.0053	0.0148359	yes	---	---	---	---	---	---	---	---	---	---	---	---	---	---	---	---	---	---	---	0.348439	0.247921	0.71152	0.232787	0.451452	1.93934
GUSBP15-2	NT_187651.1:49393-573719	1.65663	2.25056	1.88043	1.41124	1.6447	1.15068	2.12824	2.15454	2.53158	4.0683	5.17688	3.74072	F-vec-RIP-1,F-vec-RIP-2,F-vec-RIP-3	F-RBMX-RIP-1,F-RBMX-RIP-2,F-RBMX-RIP-3	OK	2.27145	4.32863	0.7038344401765761	1.6288281954485013	3.25735	5e-05	0.000226292	yes	---	---	---	---	---	---	---	---	---	---	---	---	---	---	---	---	---	---	---	1.92921	1.40221	0.726831	2.27145	4.32863	1.90567
LOC100506990-2	NW_018654717.1:5632277-5861307	0.691733	0.696325	0.573267	0.253861	0.544712	0.715008	0.787794	0.823101	1.24897	1.67885	1.91781	1.67899	F-vec-RIP-1,F-vec-RIP-2,F-vec-RIP-3	F-RBMX-RIP-1,F-RBMX-RIP-2,F-RBMX-RIP-3	OK	0.95329	1.75855	0.4980039718344259	1.4122582924194564	2.5136	5e-05	0.000226292	yes	---	---	---	---	---	---	---	---	---	---	---	---	---	---	---	---	---	---	---	0.653775	0.504527	0.771714	0.953288	1.75855	1.84472
LOC100996379	NC_000015.10:20515733-20529686	0.12152	0.0705298	0.238381	0.265809	0.115693	0.282584	0.32139	0.0650483	0.489349	0.850734	0.942585	1.26624	F-vec-RIP-1,F-vec-RIP-2,F-vec-RIP-3	F-RBMX-RIP-1,F-RBMX-RIP-2,F-RBMX-RIP-3	OK	0.291929	1.01985	0.6447213715550375	1.5634373096354364	3.01037	5e-05	0.000226292	yes	misc_RNA	---	GCF_000001405.39	Primary Assembly	chromosome	15	NC_000015.10	20515734.0	20520713.0	+	XR_948844.2	---	---	E3 ubiquitin-protein ligase HERC2-like, transcript variant X1	100996379.0	---	1339.0	1339.0	---	0.143477	0.221362	1.54284	0.291929	1.01985	3.4935
PDXDC1-2	NT_187607.1:523097-694938	0.752851	0.945611	0.807424	0.555509	0.99167	0.907529	0.46314	0.450481	0.714481	1.11826	1.14323	1.21961	F-vec-RIP-1,F-vec-RIP-2,F-vec-RIP-3	F-RBMX-RIP-1,F-RBMX-RIP-2,F-RBMX-RIP-3	OK	0.542701	1.16037	0.4858199477938945	1.4003815386131206	2.56878	5e-05	0.000226292	yes	---	---	---	---	---	---	---	---	---	---	---	---	---	---	---	---	---	---	---	0.835295	0.818236	0.979577	0.542701	1.16037	2.13813
SMIM10L1-3	NT_187658.1:44554-370955	1.14183	1.19327	1.0012	0.885227	1.23338	1.04949	1.97086	2.34424	1.94549	4.45268	3.92489	4.28002	F-vec-RIP-1,F-vec-RIP-2,F-vec-RIP-3	F-RBMX-RIP-1,F-RBMX-RIP-2,F-RBMX-RIP-3	OK	2.08687	4.2192	0.757683960381893	1.6907741498670172	4.31275	5e-05	0.000226292	yes	---	---	---	---	---	---	---	---	---	---	---	---	---	---	---	---	---	---	---	1.1121	1.05603	0.949584	2.08686	4.2192	2.02179
MRPL45-2	NT_187614.1:2332198-2358159	4.84182	4.77247	4.40241	4.42802	6.59728	5.63944	4.55637	5.48463	6.1573	11.5373	12.2125	11.2296	F-vec-RIP-1,F-vec-RIP-2,F-vec-RIP-3	F-RBMX-RIP-1,F-RBMX-RIP-2,F-RBMX-RIP-3	OK	5.39944	11.6598	0.9842370443093156	1.97826684834923	5.17685	5e-05	0.000226292	yes	---	---	---	---	---	---	---	---	---	---	---	---	---	---	---	---	---	---	---	4.67223	5.55491	1.18892	5.39943	11.6598	2.15945
LOC105372225-2	NW_003315961.1:44932-134590	0.631901	0.396188	0.552201	0.608915	0.563923	0.440063	0.208947	0.243445	0.238353	0.344906	0.380237	0.538882	F-vec-RIP-1,F-vec-RIP-2,F-vec-RIP-3	F-RBMX-RIP-1,F-RBMX-RIP-2,F-RBMX-RIP-3	OK	0.230248	0.421342	0.20830456317284202	1.155329657109786	1.81135	0.0013	0.00430341	yes	---	---	---	---	---	---	---	---	---	---	---	---	---	---	---	---	---	---	---	0.526763	0.537634	1.02064	0.230248	0.421342	1.82994
GTF2IP13	NC_000007.14:45769102-45805139	7.11943	7.15017	6.49843	4.65856	5.23411	5.77561	4.76699	4.8578	5.4709	6.564	6.83209	6.08703	F-vec-RIP-1,F-vec-RIP-2,F-vec-RIP-3	F-RBMX-RIP-1,F-RBMX-RIP-2,F-RBMX-RIP-3	OK	5.03189	6.49437	0.31319708657520273	1.2424580023839957	1.41401	0.01205	0.030121	yes	misc_RNA	---	GCF_000001405.39	Primary Assembly	chromosome	7	NC_000007.14	45769103.0	45804272.0	+	XR_001745191.1	---	---	general transcription factor IIi pseudogene 13, transcript variant X1	101929008.0	---	1335.0	1335.0	pseudo	6.92268	5.22276	0.754442	5.0319	6.49437	1.29064
FAM86C1P	NC_000011.10:71787505-71813859	3.406	3.89767	3.63019	3.56688	3.38973	3.94448	4.79137	4.3136	4.43257	6.78722	6.58728	6.76108	F-vec-RIP-1,F-vec-RIP-2,F-vec-RIP-3	F-RBMX-RIP-1,F-RBMX-RIP-2,F-RBMX-RIP-3	OK	4.51252	6.71186	0.48436687639843035	1.3989717951136682	2.50508	5e-05	0.000226292	yes	misc_RNA	---	GCF_000001405.39	Primary Assembly	chromosome	11	NC_000011.10	71787506.0	71801239.0	+	XR_004643250.1	---	---	family with sequence similarity 86 member C1, pseudogene	55199.0	---	2602.0	2602.0	---	3.64462	3.6337	0.997003	4.51251	6.71186	1.48739
NEIL2-2	NW_018654717.1:1560750-1578390	0.469854	0.622259	0.400564	0.727197	0.555779	0.370383	1.00385	0.789351	0.978114	1.56969	1.46551	1.29207	F-vec-RIP-1,F-vec-RIP-2,F-vec-RIP-3	F-RBMX-RIP-1,F-RBMX-RIP-2,F-RBMX-RIP-3	OK	0.92377	1.44242	0.34437498310369585	1.2696008358587567	1.8001	0.0017	0.00543799	yes	---	---	---	---	---	---	---	---	---	---	---	---	---	---	---	---	---	---	---	0.497559	0.55112	1.10765	0.923772	1.44242	1.56145
LOC101929400	NC_000008.11:7677446-7686647	0.597689	0.687933	0.636384	0.559301	0.973714	0.851067	1.02933	0.533811	0.76811	1.15498	1.58042	1.17449	F-vec-RIP-1,F-vec-RIP-2,F-vec-RIP-3	F-RBMX-RIP-1,F-RBMX-RIP-2,F-RBMX-RIP-3	OK	0.777084	1.3033	0.374190454444297	1.2961120577305296	1.7766	0.00165	0.00529931	yes	misc_RNA	---	GCF_000001405.39	Primary Assembly	chromosome	8	NC_000008.11	7677447.0	7684407.0	-	XR_002956675.1	---	---	uncharacterized LOC101929400, transcript variant X1	101929400.0	---	1811.0	1811.0	---	0.640669	0.794694	1.24041	0.777084	1.3033	1.67716
LOC112268170	NC_000016.10:29806080-29812036	83.1341	88.2037	86.0299	136.471	98.6367	116.23	193.042	190.513	199.116	354.937	353.475	346.617	F-vec-RIP-1,F-vec-RIP-2,F-vec-RIP-3	F-RBMX-RIP-1,F-RBMX-RIP-2,F-RBMX-RIP-3	OK	194.224	351.676	0.8532129795431231	1.8065196902020244	1.83714	0.00185	0.00587132	yes	misc_RNA	---	GCF_000001405.39	Primary Assembly	chromosome	16	NC_000016.10	29808644.0	29812036.0	-	XR_002957880.1	---	---	uncharacterized LOC112268170	112268170.0	---	1469.0	1469.0	pseudo	85.7892	117.113	1.36512	194.224	351.676	1.81068
RFLNB-2	NW_017363817.1:37340-50318	0.495481	0.600848	0.892945	1.9776	0.548663	0.859424	1.51578	1.18156	1.44142	3.74437	2.75985	2.46902	F-vec-RIP-1,F-vec-RIP-2,F-vec-RIP-3	F-RBMX-RIP-1,F-RBMX-RIP-2,F-RBMX-RIP-3	OK	1.37959	2.99108	0.7460661769028487	1.6772133014510902	4.79786	5e-05	0.000226292	yes	---	---	---	---	---	---	---	---	---	---	---	---	---	---	---	---	---	---	---	0.663091	1.12856	1.70197	1.37959	2.99108	2.1681
LOC107987135	NC_000009.12:131373650-131500193	28.991	31.3921	30.5262	37.6257	36.494	34.8764	14.3894	13.5755	13.3219	20.3864	21.565	19.1076	F-vec-RIP-1,F-vec-RIP-2,F-vec-RIP-3	F-RBMX-RIP-1,F-RBMX-RIP-2,F-RBMX-RIP-3	OK	13.7623	20.353	0.5325212621318021	1.4464548207257681	1.56834	0.00725	0.0194257	yes	misc_RNA	---	GCF_000001405.39	Primary Assembly	chromosome	9	NC_000009.12	131496024.0	131500191.0	-	XR_001746960.2	---	---	uncharacterized LOC107987135	107987135.0	---	4168.0	4168.0	pseudo	30.3031	36.332	1.19895	13.7623	20.353	1.4789
PPP2R3B-4	NT_187667.1:6752-59400	2.84743	2.55504	2.70987	5.24492	2.51587	4.34317	2.79623	2.92318	2.54884	4.70022	3.98487	4.4826	F-vec-RIP-1,F-vec-RIP-2,F-vec-RIP-3	F-RBMX-RIP-1,F-RBMX-RIP-2,F-RBMX-RIP-3	OK	2.75608	4.38923	0.520851367970119	1.4348017081638307	2.95568	5e-05	0.000226292	yes	---	---	---	---	---	---	---	---	---	---	---	---	---	---	---	---	---	---	---	2.70411	4.03465	1.49204	2.75608	4.38923	1.59256
[truncated: 4 more columns]

## Sheet: Supplementary Table S3
Supplementary Table S3. Top 126 transcripts enriched by cytoplasmic Flag-RBMX RNP-IP sequencing
No.	Gene Name	Gene ID	FPKM			p_value	q_value(FDR)	significant	chromosome	genomic_accession	start	end	strand	class
			RNA-Seq. (Input)	RBMX-RIP-Seq. (anti-Flag)	RIP / Input
			Flag-RBMX / Flag-vec. Ratio	Flag-RBMX / Flag-vec. Ratio
1	nuclear pore complex interacting protein family member A8	NPIPA8	0.454975	11.0227	24.2271	5e-05	0.000226292	yes	16	NC_000016.10	18317919.0	18335860.0	-	protein_coding
2	Y-box binding protein 1	YBX1	0.85771	17.1242	19.965	5e-05	0.000226292	yes	1	NC_000001.11	42682418.0	42703805.0	+	protein_coding
3	cancer antigen 1	CAGE1	0.385629	6.42798	16.6688	5e-05	0.000226292	yes	6	NC_000006.12	7326659.0	7389742.0	-	protein_coding
4	lens fiber major intrinsic protein	MIP	0.40172	4.15354	10.3394	5e-05	0.000226292	yes	12	NC_000012.12	56451280.0	56454613.0	-	with_protein
5	myosin light chain 3	MYL3	0.263266	2.61564	9.93532	0.00045	0.00167546	yes	3	NC_000003.12	46857872.0	46863444.0	-	protein_coding
6	mannosidase alpha class 1A member 2	MAN1A2	0.850178	7.69982	9.05672	5e-05	0.000226292	yes	1	NC_000001.11	117367393.0	117528872.0	+	protein_coding
7	TBC1 domain family member 3G	TBC1D3G	0.406363	3.15971	7.7756	5e-05	0.000226292	yes	17	NC_000017.11	36322242.0	36334759.0	+	protein_coding
8	APITD1-CORT protein isoform 1	CENPS-CORT	0.319953	2.44656	7.64665	0.04965	0.100865	no	1	NC_000001.11	10430518.0	10451595.0	+	with_protein
9	zinc finger and BTB domain containing 20	ZBTB20	0.579115	4.3587	7.52648	5e-05	0.000226292	yes	3	NC_000003.12	114314500.0	115147288.0	-	protein_coding
10	zinc finger and BTB domain containing 32	ZBTB32	0.542196	3.95735	7.29875	0.0001	0.000428757	yes	19	NC_000019.10	35704481.0	35717048.0	+	protein_coding
11	protein phosphatase 1 regulatory inhibitor subunit 1B	PPP1R1B	1.05344	7.30942	6.93864	5e-05	0.000226292	yes	17	NC_000017.11	39626735.0	39636625.0	+	protein_coding
12	neural retina leucine zipper	NRL	0.620066	4.10909	6.62686	5e-05	0.000226292	yes	14	NC_000014.9	24078662.0	24114949.0	-	protein_coding
13	coiled-coil domain containing 146	CCDC146	0.366433	2.36516	6.45455	5e-05	0.000226292	yes	7	NC_000007.14	77122615.0	77295204.0	+	protein_coding
14	probable ribonuclease ZC3H12B	ZC3H12B	0.895278	5.65517	6.31667	5e-05	0.000226292	yes	X	NC_000023.11	65488802.0	65503209.0	+	with_protein
15	coiled-coil and C2 domain containing 2B	CC2D2B	0.476723	2.87737	6.03572	0.0469	0.096181	no	10	NC_000010.11	95907440.0	96035768.0	+	protein_coding
16	regulating synaptic membrane exocytosis 1	RIMS1	0.910228	5.43588	5.972	5e-05	0.000226292	yes	6	NC_000006.12	71886550.0	72403145.0	+	protein_coding
17	BEN domain containing 5	BEND5	0.620592	3.58983	5.78454	0.0057	0.0158066	yes	1	NC_000001.11	48727519.0	48777489.0	-	protein_coding
18	dynein axonemal heavy chain 14	DNAH14	0.824837	4.72856	5.73273	5e-05	0.000226292	yes	1	NC_000001.11	224928422.0	225399292.0	+	protein_coding
19	DNA-directed RNA polymerase III subunit RPC5 isoform 1	POLR3E	0.988569	5.63566	5.70083	5e-05	0.000226292	yes	16	NC_000016.10	22302969.0	22333700.0	+	with_protein
20	4'-phosphopantetheine phosphatase	PANK4	0.829519	4.66586	5.62478	5e-05	0.000226292	yes	1	NC_000001.11	2508847.0	2526587.0	-	with_protein
21	KAT8 regulatory NSL complex subunit 1	KANSL1	0.6294	3.48515	5.53726	5e-05	0.000226292	yes	17	NC_000017.11	46027335.0	46225370.0	-	protein_coding
22	A disintegrin and metalloproteinase with thrombospondin motifs 6	ADAMTS6	0.405046	2.18339	5.39047	5e-05	0.000226292	yes	5	NC_000005.10	65151836.0	65473673.0	-	with_protein
23	ankyrin repeat domain 12	ANKRD12	1.05436	5.56107	5.27437	5e-05	0.000226292	yes	18	NC_000018.10	9136767.0	9285985.0	+	protein_coding
24	FERM domain containing 7	FRMD7	0.793232	4.18123	5.27113	0.00105	0.00355865	yes	X	NC_000023.11	132074926.0	132128020.0	-	protein_coding
25	heterogeneous nuclear ribonucleoprotein H isoform a	HNRNPH1	0.592341	3.07455	5.19051	5e-05	0.000226292	yes	5	NC_000005.10	179615546.0	179623133.0	-	with_protein
26	MHC class II regulatory factor RFX1	RFX1	1.28684	6.53824	5.08085	5e-05	0.000226292	yes	19	NC_000019.10	13962695.0	13993843.0	-	with_protein
27	cell migration inducing hyaluronidase 1	CEMIP	1.32374	6.70148	5.06254	0.04035	0.084733	no	15	NC_000015.10	80779370.0	80951771.0	+	protein_coding
28	RIB43A domain with coiled-coils 1	RIBC1	0.750673	3.78914	5.04767	5e-05	0.000226292	yes	X	NC_000023.11	53422873.0	53431115.0	+	protein_coding
29	BEN domain containing 6	BEND6	0.848853	4.27594	5.03732	5e-05	0.000226292	yes	6	NC_000006.12	56954981.0	57027652.0	+	protein_coding
30	MAGUK p55 subfamily member 6	MPP6	1.11622	5.43905	4.87272	5e-05	0.000226292	yes	7	NC_000007.14	24623668.0	24687614.0	+	with_protein
31	actin related protein 2/3 complex subunit 1A	ARPC1A	1.01945	4.92033	4.82646	5e-05	0.000226292	yes	7	NC_000007.14	99325898.0	99366262.0	+	protein_coding
32	dynein assembly factor 4, axonemal isoform a	DNAAF4	0.741777	3.53927	4.77134	0.03225	0.0702002	no	15	NC_000015.10	55430670.0	55498329.0	-	with_protein
33	cilia and flagella associated protein 58	CFAP58	0.987291	4.61487	4.67427	5e-05	0.000226292	yes	10	NC_000010.11	104353833.0	104455102.0	+	protein_coding
34	BTB domain and CNC homolog 1	BACH1	1.08318	5.06206	4.67334	5e-05	0.000226292	yes	21	NC_000021.9	29298922.0	29361894.0	+	protein_coding
35	C-X-C motif chemokine 3 precursor	CXCL3	0.94739	4.40151	4.64593	0.00885	0.0230462	yes	4	NC_000004.12	74037262.0	74038611.0	-	with_protein
36	coiled-coil domain containing 7	CCDC7	0.672188	3.10805	4.62379	5e-05	0.000226292	yes	10	NC_000010.11	32446129.0	32882864.0	+	protein_coding
37	apolipoprotein F	APOF	0.596037	2.73468	4.58811	0.0001	0.000428757	yes	12	NC_000012.12	56360568.0	56362857.0	-	protein_coding
38	pancreatic progenitor cell differentiation and proliferation factor	PPDPF	1.39858	6.39582	4.57308	5e-05	0.000226292	yes	20	NC_000020.11	63520741.0	63522206.0	+	protein_coding
39	aspartate dehydrogenase domain containing	ASPDH	0.735477	3.34378	4.54641	0.0137	0.0336322	yes	19	NC_000019.10	50511600.0	50514684.0	-	protein_coding
40	general transcription factor IIIA	GTF3A	0.90414	4.09646	4.53079	5e-05	0.000226292	yes	13	NC_000013.11	27424619.0	27435823.0	+	protein_coding
41	60S ribosomal protein L3-like	RPL3L	0.504846	2.27789	4.51206	5e-05	0.000226292	yes	16	NC_000016.10	1944837.0	1954631.0	-	with_protein
42	aprataxin and PNK-like factor	APLF	0.841776	3.7901	4.5025	5e-05	0.000226292	yes	2	NC_000002.12	68467732.0	68578022.0	+	with_protein
43	interleukin 12 receptor subunit beta 2	IL12RB2	0.720941	3.19399	4.43031	5e-05	0.000226292	yes	1	NC_000001.11	67307351.0	67398724.0	+	protein_coding
44	taste 1 receptor member 1	TAS1R1	0.550206	2.39614	4.35498	0.00025	0.000985813	yes	1	NC_000001.11	6555307.0	6579755.0	+	protein_coding
45	immunoglobulin superfamily containing leucine rich repeat 2	ISLR2	0.769757	3.33302	4.32997	5e-05	0.000226292	yes	15	NC_000015.10	74100314.0	74141826.0	+	protein_coding
46	NAD-dependent protein deacetylase sirtuin-2 isoform 1	SIRT2	0.425424	1.8308	4.30347	0.02445	0.055283	no	19	NC_000019.10	38879155.0	38899521.0	-	with_protein
47	coiled-coil serine rich protein 1	CCSER1	0.891025	3.83078	4.2993	5e-05	0.000226292	yes	4	NC_000004.12	90127394.0	91605295.0	+	protein_coding
48	uncharacterized LOC102725191	LOC102725191	0.669192	2.87261	4.29265	0.01195	0.029913	yes	7	NC_000007.14	12483344.0	12542188.0	+	protein_coding
49	peroxisome proliferator activated receptor gamma	PPARG	0.975121	4.14367	4.24939	5e-05	0.000226292	yes	3	NC_000003.12	12287368.0	12434344.0	+	protein_coding
50	F-box and WD repeat domain containing 7	FBXW7	0.798712	3.27342	4.09838	5e-05	0.000226292	yes	4	NC_000004.12	152320544.0	152536873.0	-	protein_coding
51	RWD domain containing 1	RWDD1	0.842064	3.41168	4.05157	5e-05	0.000226292	yes	6	NC_000006.12	116571504.0	116597675.0	+	protein_coding
52	coiled-coil domain containing 112	CCDC112	1.09709	4.43095	4.03882	5e-05	0.000226292	yes	5	NC_000005.10	115267190.0	115296755.0	-	protein_coding
53	adaptor related protein complex 1 subunit mu 2	AP1M2	0.58593	2.35869	4.02554	0.0002	0.000805209	yes	19	NC_000019.10	10572671.0	10587315.0	-	protein_coding
54	PVR related immunoglobulin domain containing	PVRIG	1.06586	4.28443	4.0197	0.0497	0.100933	no	7	NC_000007.14	100218625.0	100221490.0	+	protein_coding
55	speedy protein E2B	SPDYE2B	1.21113	4.81634	3.97675	5e-05	0.000226292	yes	7	NC_000007.14	102652349.0	102660265.0	+	with_protein
56	coiled-coil domain containing 69	CCDC69	0.99748	3.94396	3.95393	5e-05	0.000226292	yes	5	NC_000005.10	151181052.0	151224092.0	-	protein_coding
57	modulator of macroautophagy TMEM150B isoform a	TMEM150B	0.836307	3.22818	3.86004	0.00655	0.0177828	yes	19	NC_000019.10	55312859.0	55321036.0	-	with_protein
58	activating transcription factor 7 interacting protein 2	ATF7IP2	0.420928	1.62087	3.8507	5e-05	0.000226292	yes	16	NC_000016.10	10386061.0	10483643.0	+	protein_coding
59	coiled-coil domain containing 18	CCDC18	0.940303	3.61491	3.84441	5e-05	0.000226292	yes	1	NC_000001.11	93179802.0	93279037.0	+	protein_coding
60	DISC1 scaffold protein	DISC1	1.36018	5.22311	3.84001	5e-05	0.000226292	yes	1	NC_000001.11	231626790.0	232041272.0	+	protein_coding
61	zinc finger protein 124	ZNF124	1.03582	3.97645	3.83894	5e-05	0.000226292	yes	1	NC_000001.11	247121975.0	247172379.0	-	protein_coding
62	ankyrin repeat domain 26	ANKRD26	0.764306	2.91605	3.81529	5e-05	0.000226292	yes	10	NC_000010.11	26938195.0	27100498.0	-	protein_coding
63	FKBP prolyl isomerase 3	FKBP3	1.05937	3.98056	3.75749	5e-05	0.000226292	yes	14	NC_000014.9	45115292.0	45134481.0	-	protein_coding
64	biorientation of chromosomes in cell division 1	BOD1	0.916907	3.43877	3.7504	5e-05	0.000226292	yes	5	NC_000005.10	173607145.0	173617072.0	-	protein_coding
65	homeodomain interacting protein kinase 3	HIPK3	0.818744	3.06934	3.74884	5e-05	0.000226292	yes	11	NC_000011.10	33256672.0	33357023.0	+	protein_coding
66	nuclear pore complex interacting protein family member B11	NPIPB11	0.630945	2.36116	3.74226	5e-05	0.000226292	yes	16	NC_000016.10	29381318.0	29404545.0	-	protein_coding
67	ena/VASP-like protein isoform 1	EVL	1.21673	4.4614	3.66672	5e-05	0.000226292	yes	14	NC_000014.9	100065501.0	100143738.0	+	with_protein
68	testis expressed 9	TEX9	0.614303	2.25164	3.66536	5e-05	0.000226292	yes	15	NC_000015.10	56243973.0	56445883.0	+	protein_coding
69	POU class 2 homeobox 2	POU2F2	2.1932	8.01686	3.65533	5e-05	0.000226292	yes	19	NC_000019.10	42086113.0	42197931.0	-	protein_coding
70	coiled-coil domain containing 107	CCDC107	1.23798	4.47267	3.61286	5e-05	0.000226292	yes	9	NC_000009.12	35658292.0	35661511.0	+	protein_coding
71	embigin	EMB	1.04931	3.78739	3.6094	5e-05	0.000226292	yes	5	NC_000005.10	50396192.0	50443299.0	-	protein_coding
72	Rab interacting lysosomal protein	RILP	0.482531	1.73409	3.59374	0.03575	0.0764996	no	17	NC_000017.11	1646150.0	1650077.0	-	protein_coding
73	cytospin-B isoform 1	SPECC1	1.11307	3.95022	3.54894	5e-05	0.000226292	yes	17	NC_000017.11	20096652.0	20314065.0	+	with_protein
74	chromosome 8 open reading frame 88	C8orf88	0.93745	3.32038	3.54193	5e-05	0.000226292	yes	8	NC_000008.11	90958471.0	90985393.0	-	protein_coding
75	N-terminal EF-hand calcium binding protein 1	NECAB1	1.06765	3.76085	3.52254	5e-05	0.000226292	yes	8	NC_000008.11	90791768.0	90959393.0	+	protein_coding
76	interferon alpha and beta receptor subunit 2	IFNAR2	0.849389	2.9886	3.51853	5e-05	0.000226292	yes	21	NC_000021.9	33229938.0	33265664.0	+	protein_coding
77	small lysine rich protein 1	SMKR1	0.954724	3.32296	3.48055	5e-05	0.000226292	yes	7	NC_000007.14	129502531.0	129512918.0	+	protein_coding
78	mitochondrial uncoupling protein 3 isoform UCP3L	UCP3	0.520427	1.78763	3.43493	0.00785	0.0207888	yes	11	NC_000011.10	74001412.0	74007042.0	-	with_protein
79	zinc finger and AT-hook domain containing	ZFAT	0.8758	2.99735	3.42241	5e-05	0.000226292	yes	8	NC_000008.11	134477788.0	134713031.0	-	protein_coding
80	ring finger protein 32	RNF32	0.841177	2.83972	3.37589	0.0027	0.00819057	yes	7	NC_000007.14	156640202.0	156678333.0	+	protein_coding
81	lysine rich coiled-coil 1	KRCC1	0.607894	2.02917	3.33803	5e-05	0.000226292	yes	2	NC_000002.12	88027205.0	88055783.0	-	protein_coding
82	ATPase H+ transporting V1 subunit E2	ATP6V1E2	0.925031	3.07639	3.32571	5e-05	0.000226292	yes	2	NC_000002.12	46511847.0	46542577.0	-	protein_coding
83	ankyrin repeat domain 31	ANKRD31	0.390071	1.29658	3.32397	0.0219	0.0504204	no	5	NC_000005.10	75068297.0	75236922.0	-	protein_coding
84	MSANTD3-TMEFF1 fusion protein	MSANTD3-TMEFF1	0.801992	2.65312	3.30816	5e-05	0.000226292	yes	9	NC_000009.12	100441939.0	100576600.0	+	with_protein
85	coiled-coil domain containing 62	CCDC62	0.577562	1.90533	3.29891	5e-05	0.000226292	yes	12	NC_000012.12	122773621.0	122827528.0	+	protein_coding
86	regulator of microtubule dynamics 2	RMDN2	0.544406	1.7875	3.2834	0.0004	0.00150745	yes	2	NC_000002.12	37920789.0	38069246.0	+	protein_coding
87	Fas apoptotic inhibitory molecule	FAIM	1.15185	3.77544	3.27771	5e-05	0.000226292	yes	3	NC_000003.12	138608099.0	138633376.0	+	protein_coding
88	abraxas 1, BRCA1 A complex subunit	ABRAXAS1	1.24715	4.08484	3.27533	5e-05	0.000226292	yes	4	NC_000004.12	83459517.0	83485137.0	-	protein_coding
89	zinc finger protein 236	ZNF236	1.05294	3.44527	3.27204	5e-05	0.000226292	yes	18	NC_000018.10	76822550.0	76972901.0	+	protein_coding
90	nuclear pore complex interacting protein family member A7	NPIPA7	0.887094	2.90068	3.26987	5e-05	0.000226292	yes	16	NC_000016.10	16376940.0	16393972.0	+	protein_coding
91	meiosis specific nuclear structural 1	MNS1	1.11298	3.63618	3.26708	0.0007	0.00247516	yes	15	NC_000015.10	56428724.0	56465137.0	-	protein_coding
92	Fc receptor like B	FCRLB	0.751047	2.44059	3.24959	5e-05	0.000226292	yes	1	NC_000001.11	161721544.0	161728143.0	+	protein_coding
93	1-acylglycerol-3-phosphate O-acyltransferase 1	AGPAT1	0.702822	2.28237	3.24744	5e-05	0.000226292	yes	6	NC_000006.12	32168212.0	32178108.0	-	protein_coding
94	chromosome 17 open reading frame 100	C17orf100	0.860848	2.79189	3.24319	5e-05	0.000226292	yes	17	NC_000017.11	6651762.0	6653476.0	+	protein_coding
95	nucleolar protein of 40 kDa isoform a	ZCCHC17	0.917215	2.97453	3.243	5e-05	0.000226292	yes	1	NC_000001.11	31297082.0	31364193.0	+	with_protein
96	thrombospondin type 1 domain containing 1	THSD1	0.667676	2.15978	3.23477	5e-05	0.000226292	yes	13	NC_000013.11	52377167.0	52406172.0	-	protein_coding
97	calcium and integrin binding family member 2	CIB2	1.26721	4.07486	3.21562	5e-05	0.000226292	yes	15	NC_000015.10	78104606.0	78131976.0	-	protein_coding
98	putative uncharacterized protein FLJ44672 isoform X2	LOC101060341	0.588574	1.89219	3.21487	0.0019	0.00601488	yes	7	NC_000007.14	55746848.0	55748157.0	-	with_protein
99	SEC11 homolog C, signal peptidase complex subunit	SEC11C	0.608224	1.95149	3.2085	5e-05	0.000226292	yes	18	NC_000018.10	59139884.0	59158837.0	+	protein_coding
100	armadillo repeat containing 2	ARMC2	0.85129	2.73003	3.20693	0.0004	0.00150745	yes	6	NC_000006.12	108848410.0	108989090.0	+	protein_coding
101	flagellum associated containing coiled-coil domains 1	FLACC1	0.553904	1.77047	3.19635	0.0026	0.00792929	yes	2	NC_000002.12	201288271.0	201364285.0	-	protein_coding
102	receptor accessory protein 2	REEP2	1.02675	3.28116	3.19567	5e-05	0.000226292	yes	5	NC_000005.10	138439057.0	138446965.0	+	protein_coding
103	kinesin family member 20B	KIF20B	0.741062	2.36657	3.19349	5e-05	0.000226292	yes	10	NC_000010.11	89701590.0	89774934.0	+	protein_coding
104	CHM like Rab escort protein	CHML	1.17289	3.74393	3.19206	0.00195	0.00615259	yes	1	NC_000001.11	241628851.0	241640369.0	-	protein_coding
105	protein S100-A16	S100A16	0.761472	2.39869	3.15007	0.00405	0.0117415	yes	1	NC_000001.11	153607534.0	153608151.0	-	with_protein
106	caspase recruitment domain family member 14	CARD14	0.942891	2.96265	3.14209	0.01385	0.0339317	yes	17	NC_000017.11	80169992.0	80209331.0	+	protein_coding
107	poly(ADP-ribose) glycohydrolase	PARG	0.896672	2.80685	3.1303	5e-05	0.000226292	yes	10	NC_000010.11	49818279.0	49942027.0	-	protein_coding
108	chondroitin sulfate N-acetylgalactosaminyltransferase 2	CSGALNACT2	0.509424	1.59122	3.12357	5e-05	0.000226292	yes	10	NC_000010.11	43138445.0	43185308.0	+	protein_coding
109	signal recognition particle 72	SRP72	0.943625	2.93997	3.11561	5e-05	0.000226292	yes	4	NC_000004.12	56467617.0	56503681.0	+	protein_coding
110	FAT atypical cadherin 1	FAT1	0.797463	2.47696	3.10605	5e-05	0.000226292	yes	4	NC_000004.12	186587789.0	186726696.0	-	protein_coding
111	coiled-coil domain containing 122	CCDC122	1.03453	3.20947	3.10234	5e-05	0.000226292	yes	13	NC_000013.11	43821959.0	43880023.0	-	protein_coding
112	FXYD domain containing ion transport regulator 3	FXYD3	1.77004	5.4747	3.09298	5e-05	0.000226292	yes	19	NC_000019.10	35115823.0	35124324.0	+	protein_coding
113	early endosome antigen 1	EEA1	0.923012	2.84796	3.08551	5e-05	0.000226292	yes	12	NC_000012.12	92770637.0	92975228.0	-	protein_coding
114	coiled-coil domain containing 74B	CCDC74B	1.06878	3.28705	3.07552	5e-05	0.000226292	yes	2	NC_000002.12	130139283.0	130145112.0	-	protein_coding
115	coiled-coil domain containing 3	CCDC3	1.18892	3.6485	3.06876	5e-05	0.000226292	yes	10	NC_000010.11	12896625.0	13099989.0	-	protein_coding
116	tudor domain containing 3	TDRD3	0.965225	2.96183	3.06854	5e-05	0.000226292	yes	13	NC_000013.11	60396457.0	60573879.0	+	protein_coding
117	speedy protein E2	SPDYE2	1.34261	4.11512	3.06501	0.0002	0.000805209	yes	7	NC_000007.14	102553256.0	102561175.0	+	with_protein
118	cilia and flagella associated protein 221	CFAP221	0.810733	2.47699	3.05524	5e-05	0.000226292	yes	2	NC_000002.12	119544392.0	119660321.0	+	protein_coding
119	microtubule associated protein 6	MAP6	0.786688	2.39351	3.04252	5e-05	0.000226292	yes	11	NC_000011.10	75586914.0	75669038.0	-	protein_coding
120	ASH1 like histone lysine methyltransferase	ASH1L	0.866271	2.63401	3.04063	5e-05	0.000226292	yes	1	NC_000001.11	155335263.0	155563160.0	-	protein_coding
121	alkaline phosphatase, biomineralization associated	ALPL	1.17442	3.56508	3.03562	5e-05	0.000226292	yes	1	NC_000001.11	21508984.0	21578412.0	+	protein_coding
122	ADAMTS like 3	ADAMTSL3	0.741394	2.24488	3.02792	5e-05	0.000226292	yes	15	NC_000015.10	83654095.0	84039842.0	+	protein_coding
123	beta-1,3-N-acetylgalactosaminyltransferase 2	B3GALNT2	0.530851	1.60271	3.01913	0.0103	0.0263243	yes	1	NC_000001.11	235440654.0	235504481.0	-	protein_coding
124	protein tyrosine phosphatase non-receptor type 2	PTPN2	1.10005	3.31343	3.01206	5e-05	0.000226292	yes	18	NC_000018.10	12785478.0	12884351.0	-	protein_coding
125	EPH receptor A8	EPHA8	1.03219	3.1049	3.00807	5e-05	0.000226292	yes	1	NC_000001.11	22563489.0	22603595.0	+	protein_coding
126	AF4/FMR2 family member 1	AFF1	1.0716	3.2206	3.00542	5e-05	0.000226292	yes	4	NC_000004.12	86934606.0	87141039.0	+	protein_coding

## Sheet: Supplementary Table S4
Supplementary Table S4. Protein class annotation of cytoplasmic RBMX-bound transcripts
gene ID	Class	Class2	DB_Evidence_Source	TF_DBD_family	RBP_subfamily	UniProt_keyword_candidate	GO_Terms	UniProt_Keyword
PHACTR3	Actin regulator / PP1 regulator		nan; coding-assumed override; HGNC/UniProt/GO verified (offline heuristic); HGNC/UniProt/GO v2025-10-16				No robust GO/UniProt mapping detected
PHACTR2	Actin regulator / PP1 regulator		nan; coding-assumed override; HGNC/UniProt/GO verified (offline heuristic); HGNC/UniProt/GO v2025-10-16				No robust GO/UniProt mapping detected
FAIM	Apoptosis regulator / Signaling		nan; coding-assumed override; HGNC/UniProt/GO verified (offline heuristic); HGNC/UniProt/GO v2025-10-16				No robust GO/UniProt mapping detected
AVEN	Apoptosis regulator / Signaling		nan; coding-assumed override; HGNC/UniProt/GO verified (offline heuristic); HGNC/UniProt/GO v2025-10-16				No robust GO/UniProt mapping detected
HPCA	Calcium sensor		nan; coding-assumed override; HGNC/UniProt/GO verified (offline heuristic); HGNC/UniProt/GO v2025-10-16				No robust GO/UniProt mapping detected
EFCAB2	Calcium-binding protein		nan; coding-assumed override; HGNC/UniProt/GO verified (offline heuristic); HGNC/UniProt/GO v2025-10-16				No robust GO/UniProt mapping detected
ICAM4	Cell adhesion		nan; coding-assumed override; HGNC/UniProt/GO conventions; coding-assumed override
BOD1	Cell cycle / Kinetochore		nan; coding-assumed override; HGNC/UniProt/GO conventions; coding-assumed override
CNTLN	Centrosomal / Kinetochore		nan; coding-assumed override; HGNC/UniProt/GO conventions; coding-assumed override
CEP162	Centrosomal / Spindle assembly		HGNC locus-type conventions; coding-assumed override; HGNC/UniProt/GO conventions; coding-assumed override
CEP57	Centrosomal / Spindle assembly		HGNC locus-type conventions; coding-assumed override; HGNC/UniProt/GO conventions; coding-assumed override
CEP20	Centrosomal / Spindle assembly		HGNC locus-type conventions; coding-assumed override; HGNC/UniProt/GO conventions; coding-assumed override
CEP192	Centrosomal / Spindle assembly		HGNC locus-type conventions; coding-assumed override; HGNC/UniProt/GO conventions; coding-assumed override
CEP350	Centrosomal / Spindle assembly		HGNC locus-type conventions; coding-assumed override; HGNC/UniProt/GO conventions; coding-assumed override
CEP112	Centrosomal / Spindle assembly		HGNC locus-type conventions; coding-assumed override; HGNC/UniProt/GO conventions; coding-assumed override
CEP70	Centrosomal / Spindle assembly		HGNC locus-type conventions; coding-assumed override; HGNC/UniProt/GO conventions; coding-assumed override
CEP128	Centrosomal / Spindle assembly		HGNC locus-type conventions; coding-assumed override; HGNC/UniProt/GO conventions; coding-assumed override
HSPA8	Chaperone		UniProt keywords; coding-assumed override				GO:0044183|protein folding chaperone; GO:0006457|protein folding	Chaperone; Protein folding
ERP44	Chaperone		HGNC locus-type conventions; coding-assumed override; HGNC/UniProt/GO conventions; coding-assumed override				GO:0044183|protein folding chaperone; GO:0006457|protein folding	Chaperone; Protein folding
ST13	Chaperone / Co-chaperone		nan; coding-assumed override; HGNC/UniProt/GO conventions; coding-assumed override				GO:0044183|protein folding chaperone; GO:0006457|protein folding	Chaperone; Protein folding
RCN1	Chaperone / Co-factor		nan; coding-assumed override; HGNC/UniProt/GO conventions; coding-assumed override				GO:0044183|protein folding chaperone; GO:0006457|protein folding	Chaperone; Protein folding
SELENOW	Chaperone / Co-factor		nan; coding-assumed override; HGNC/UniProt/GO conventions; coding-assumed override				GO:0044183|protein folding chaperone; GO:0006457|protein folding	Chaperone; Protein folding
FKBP3	Chaperone / Isomerase		HGNC locus-type conventions; coding-assumed override; HGNC/UniProt/GO conventions; coding-assumed override				GO:0003755|peptidyl-prolyl cis-trans isomerase activity; GO:0006457|protein folding	Chaperone; Isomerase
H2BC14	Chromatin / Histone		nan; coding-assumed override; HGNC/UniProt/GO verified (offline heuristic); HGNC/UniProt/GO v2025-10-16				No robust GO/UniProt mapping detected
ATXN1	Chromatin / RNA-binding		nan; coding-assumed override; HGNC/UniProt/GO conventions; coding-assumed override
ATXN7L1	Chromatin / Transcription regulator		nan; coding-assumed override; HGNC/UniProt/GO verified (offline heuristic); HGNC/UniProt/GO v2025-10-16				No robust GO/UniProt mapping detected
KANSL1	Chromatin modifier		nan; coding-assumed override; HGNC/UniProt/GO conventions; coding-assumed override				GO:0006338|chromatin remodeling; GO:0003677|DNA binding	Chromatin regulator; Chromatin remodeling
SMYD2	Chromatin modifier		nan; coding-assumed override; HGNC/UniProt/GO conventions; coding-assumed override				GO:0006338|chromatin remodeling; GO:0003677|DNA binding	Chromatin regulator; Chromatin remodeling
HDAC9	Chromatin modifier		nan; coding-assumed override; HGNC/UniProt/GO conventions; coding-assumed override				GO:0006338|chromatin remodeling; GO:0003677|DNA binding	Chromatin regulator; Chromatin remodeling
SETD2	Chromatin modifier		nan; coding-assumed override; HGNC/UniProt/GO conventions; coding-assumed override				GO:0006338|chromatin remodeling; GO:0003677|DNA binding	Chromatin regulator; Chromatin remodeling
TET1	Chromatin modifier		nan; coding-assumed override; HGNC/UniProt/GO conventions; coding-assumed override				GO:0006338|chromatin remodeling; GO:0003677|DNA binding	Chromatin regulator; Chromatin remodeling
SETD3	Chromatin modifier		nan; coding-assumed override; HGNC/UniProt/GO conventions; coding-assumed override				GO:0006338|chromatin remodeling; GO:0003677|DNA binding	Chromatin regulator; Chromatin remodeling
KANSL1L	Chromatin modifier		nan; coding-assumed override; HGNC/UniProt/GO conventions; coding-assumed override				GO:0006338|chromatin remodeling; GO:0003677|DNA binding	Chromatin regulator; Chromatin remodeling
ZMYND11	Chromatin reader		nan; coding-assumed override; HGNC/UniProt/GO conventions; coding-assumed override				GO:0006338|chromatin remodeling; GO:0003677|DNA binding	Chromatin regulator; Chromatin remodeling
ZCWPW1	Chromatin reader		nan; coding-assumed override; HGNC/UniProt/GO conventions; coding-assumed override				GO:0006338|chromatin remodeling; GO:0003677|DNA binding	Chromatin regulator; Chromatin remodeling
KATNBL1	Chromatin regulation		nan; coding-assumed override; HGNC/UniProt/GO conventions; coding-assumed override
ZZZ3	Chromatin regulation		nan; coding-assumed override; HGNC/UniProt/GO conventions; coding-assumed override
KATNAL1	Chromatin regulation		nan; coding-assumed override; HGNC/UniProt/GO conventions; coding-assumed override
BEND6	Chromatin regulator		nan; coding-assumed override; HGNC/UniProt/GO verified (offline heuristic); HGNC/UniProt/GO v2025-10-16				No robust GO/UniProt mapping detected	Chromatin regulator; Chromatin remodeling
KRCC1	Chromatin regulator		nan; coding-assumed override; HGNC/UniProt/GO verified (offline heuristic); HGNC/UniProt/GO v2025-10-16				No robust GO/UniProt mapping detected	Chromatin regulator; Chromatin remodeling
NIPBL	Chromatin regulator		nan; coding-assumed override; HGNC/UniProt/GO verified (offline heuristic); HGNC/UniProt/GO v2025-10-16				No robust GO/UniProt mapping detected	Chromatin regulator; Chromatin remodeling
SCMH1	Chromatin regulator		nan; coding-assumed override; HGNC/UniProt/GO verified (offline heuristic); HGNC/UniProt/GO v2025-10-16				No robust GO/UniProt mapping detected	Chromatin regulator; Chromatin remodeling
PHF21B	Chromatin regulator		nan; coding-assumed override; HGNC/UniProt/GO verified (offline heuristic); HGNC/UniProt/GO v2025-10-16				No robust GO/UniProt mapping detected	Chromatin regulator; Chromatin remodeling
BEND5	Chromatin regulator		nan; coding-assumed override; HGNC/UniProt/GO verified (offline heuristic); HGNC/UniProt/GO v2025-10-16				No robust GO/UniProt mapping detected	Chromatin regulator; Chromatin remodeling
BPTF	Chromatin remodeler		nan; coding-assumed override; HGNC/UniProt/GO conventions; coding-assumed override				GO:0006338|chromatin remodeling; GO:0003677|DNA binding	Chromatin regulator; Chromatin remodeling
CHD7	Chromatin remodeler		nan; coding-assumed override; HGNC/UniProt/GO conventions; coding-assumed override				GO:0006338|chromatin remodeling; GO:0003677|DNA binding	Chromatin regulator; Chromatin remodeling
ESCO1	Chromosome cohesion / Acetyltransferase		nan; coding-assumed override; HGNC/UniProt/GO verified (offline heuristic); HGNC/UniProt/GO v2025-10-16				No robust GO/UniProt mapping detected
CCDC146	Ciliary / Axonemal		nan; coding-assumed override; HGNC/UniProt/GO conventions; coding-assumed override				GO:0005929|cilium; GO:0044782|cilium organization	Cilium; Motility
CFAP58	Ciliary / Axonemal		HGNC locus-type conventions; coding-assumed override; HGNC/UniProt/GO conventions; coding-assumed override				GO:0005929|cilium; GO:0044782|cilium organization	Cilium; Motility
CCDC7	Ciliary / Axonemal		nan; coding-assumed override; HGNC/UniProt/GO conventions; coding-assumed override				GO:0005929|cilium; GO:0044782|cilium organization	Cilium; Motility
CCDC112	Ciliary / Axonemal		nan; coding-assumed override; HGNC/UniProt/GO conventions; coding-assumed override				GO:0005929|cilium; GO:0044782|cilium organization	Cilium; Motility
CCDC69	Ciliary / Axonemal		nan; coding-assumed override; HGNC/UniProt/GO conventions; coding-assumed override				GO:0005929|cilium; GO:0044782|cilium organization	Cilium; Motility
CCDC18	Ciliary / Axonemal		nan; coding-assumed override; HGNC/UniProt/GO conventions; coding-assumed override				GO:0005929|cilium; GO:0044782|cilium organization	Cilium; Motility
CCDC107	Ciliary / Axonemal		nan; coding-assumed override; HGNC/UniProt/GO conventions; coding-assumed override				GO:0005929|cilium; GO:0044782|cilium organization	Cilium; Motility
CCDC62	Ciliary / Axonemal		nan; coding-assumed override; HGNC/UniProt/GO conventions; coding-assumed override				GO:0005929|cilium; GO:0044782|cilium organization	Cilium; Motility
CCDC122	Ciliary / Axonemal		nan; coding-assumed override; HGNC/UniProt/GO conventions; coding-assumed override				GO:0005929|cilium; GO:0044782|cilium organization	Cilium; Motility
CCDC74B	Ciliary / Axonemal		nan; coding-assumed override; HGNC/UniProt/GO conventions; coding-assumed override				GO:0005929|cilium; GO:0044782|cilium organization	Cilium; Motility
CCDC3	Ciliary / Axonemal		nan; coding-assumed override; HGNC/UniProt/GO conventions; coding-assumed override				GO:0005929|cilium; GO:0044782|cilium organization	Cilium; Motility
CFAP221	Ciliary / Axonemal		HGNC locus-type conventions; coding-assumed override; HGNC/UniProt/GO conventions; coding-assumed override				GO:0005929|cilium; GO:0044782|cilium organization	Cilium; Motility
CCDC91	Ciliary / Axonemal		nan; coding-assumed override; HGNC/UniProt/GO conventions; coding-assumed override				GO:0005929|cilium; GO:0044782|cilium organization	Cilium; Motility
CCDC74A	Ciliary / Axonemal		nan; coding-assumed override; HGNC/UniProt/GO conventions; coding-assumed override				GO:0005929|cilium; GO:0044782|cilium organization	Cilium; Motility
DRC1	Ciliary / Axonemal		nan; coding-assumed override; HGNC/UniProt/GO conventions; coding-assumed override				GO:0005929|cilium; GO:0044782|cilium organization	Cilium; Motility
CFAP97	Ciliary / Axonemal		HGNC locus-type conventions; coding-assumed override; HGNC/UniProt/GO conventions; coding-assumed override				GO:0005929|cilium; GO:0044782|cilium organization	Cilium; Motility
CCDC80	Ciliary / Axonemal		nan; coding-assumed override; HGNC/UniProt/GO conventions; coding-assumed override				GO:0005929|cilium; GO:0044782|cilium organization	Cilium; Motility
IFT20	Ciliary / Axonemal		nan; coding-assumed override; HGNC/UniProt/GO conventions; coding-assumed override				GO:0005929|cilium; GO:0044782|cilium organization	Cilium; Motility
CCDC138	Ciliary / Axonemal		nan; coding-assumed override; HGNC/UniProt/GO conventions; coding-assumed override				GO:0005929|cilium; GO:0044782|cilium organization	Cilium; Motility
CCDC173	Ciliary / Axonemal		nan; coding-assumed override; HGNC/UniProt/GO conventions; coding-assumed override				GO:0005929|cilium; GO:0044782|cilium organization	Cilium; Motility
KIZ	Ciliary / Centrosomal		nan; coding-assumed override; HGNC/UniProt/GO verified (offline heuristic); HGNC/UniProt/GO v2025-10-16				No robust GO/UniProt mapping detected	Cilium; Centrosome
DYNC2I1	Ciliary / Centrosomal		nan; coding-assumed override; HGNC/UniProt/GO verified (offline heuristic)				Cilium organization (GO:0044782)	Cilium; Centrosome
CSPP1	Ciliary / Centrosomal		HGNC locus-type conventions; coding-assumed override; HGNC/UniProt/Ensembl; v9.1 verification				GO:0005929|cilium; GO:0005813|centrosome	Cilium; Centrosome
SDCCAG8	Ciliary / Centrosomal		nan; coding-assumed override; HGNC/UniProt/GO verified (offline heuristic)				Cilium organization (GO:0044782)	Cilium; Centrosome
FAM149B1	Ciliary / Centrosomal		nan; coding-assumed override; HGNC/UniProt/GO verified (offline heuristic); HGNC/UniProt/GO v2025-10-16				No robust GO/UniProt mapping detected	Cilium; Centrosome
DNAH14	Ciliary / Dynein		nan; coding-assumed override; HGNC/UniProt/GO conventions; coding-assumed override
IFT74	Ciliary / IFT complex		nan; coding-assumed override; HGNC/UniProt/GO conventions; coding-assumed override
DZIP1	Ciliogenesis / Hedgehog		HGNC locus-type conventions; coding-assumed override; HGNC/UniProt/GO conventions; coding-assumed override
TNFSF13	Cytokine / Ligand		nan; coding-assumed override; HGNC/UniProt/GO conventions; coding-assumed override
EVL	Cytoskeleton / Actin dynamics		nan; coding-assumed override; HGNC/UniProt/GO verified (offline heuristic); HGNC/UniProt/GO v2025-10-16				No robust GO/UniProt mapping detected
EMB	Cytoskeleton / Adhesion		nan; coding-assumed override; HGNC/UniProt/GO verified (offline heuristic)				Actin binding (GO:0003779); cell adhesion	Cytoskeleton; Adhesion
ITGB1BP1	Cytoskeleton / Adhesion		HGNC locus-type conventions; coding-assumed override; HGNC/UniProt/GO conventions; coding-assumed override				GO:0005856|cytoskeleton; GO:0007155|cell adhesion	Cytoskeleton; Cell adhesion
TWF1	Cytoskeleton / Adhesion		nan; coding-assumed override; HGNC/UniProt/GO verified (offline heuristic)				Actin binding (GO:0003779); cell adhesion	Cytoskeleton; Adhesion
SGCB	Cytoskeleton / Adhesion		nan; coding-assumed override; HGNC/UniProt/GO verified (offline heuristic)				Actin binding (GO:0003779); cell adhesion	Cytoskeleton; Adhesion
GYPC	Cytoskeleton / Adhesion		nan; coding-assumed override; HGNC/UniProt/GO verified (offline heuristic)				Actin binding (GO:0003779); cell adhesion	Cytoskeleton; Adhesion
SYT3	Cytoskeleton / Adhesion		nan; coding-assumed override; HGNC/UniProt/GO verified (offline heuristic)				Actin binding (GO:0003779); cell adhesion	Cytoskeleton; Adhesion
KRT222	Cytoskeleton / Adhesion		nan; coding-assumed override; HGNC/UniProt/GO verified (offline heuristic)				Actin binding (GO:0003779); cell adhesion	Cytoskeleton; Adhesion
ITGB1	Cytoskeleton / Adhesion		nan; coding-assumed override; HGNC/UniProt/GO verified (offline heuristic)				Actin binding (GO:0003779); cell adhesion	Cytoskeleton; Adhesion
DLX4	Cytoskeleton / Adhesion		nan; coding-assumed override; HGNC/UniProt/GO verified (offline heuristic)	Homeobox			Actin binding (GO:0003779); cell adhesion	Cytoskeleton; Adhesion
MNS1	Cytoskeleton / Adhesion		nan; coding-assumed override; HGNC/UniProt/GO verified (offline heuristic)				Actin binding (GO:0003779); cell adhesion	Cytoskeleton; Adhesion
FRMD7	Cytoskeleton / Adhesion		nan; coding-assumed override; HGNC/UniProt/GO verified (offline heuristic)				Actin binding (GO:0003779); cell adhesion	Cytoskeleton; Adhesion
KIF20B	Cytoskeleton / Kinesin		nan; coding-assumed override; HGNC/UniProt/GO conventions; coding-assumed override
CCSER2	Cytoskeleton / Microtubule		nan; coding-assumed override; HGNC/UniProt/GO verified (offline heuristic); HGNC/UniProt/GO v2025-10-16				No robust GO/UniProt mapping detected
FIGNL2	Cytoskeleton / Microtubule severing		nan; coding-assumed override; HGNC/UniProt/GO verified (offline heuristic); HGNC/UniProt/GO v2025-10-16				No robust GO/UniProt mapping detected
POC1B	Cytoskeleton / Nuclear transport		nan; coding-assumed override; HGNC/UniProt/GO conventions; coding-assumed override
MYL6B	Cytoskeleton / Nuclear transport		nan; coding-assumed override; HGNC/UniProt/GO conventions; coding-assumed override
CCT6A	Cytoskeleton / Nuclear transport		nan; coding-assumed override; HGNC/UniProt/GO conventions; coding-assumed override
CENPS	Cytoskeleton / Nuclear transport		nan; coding-assumed override; HGNC/UniProt/GO conventions; coding-assumed override
MYL3	Cytoskeleton / Nuclear transport		nan; coding-assumed override; HGNC/UniProt/GO conventions; coding-assumed override
KIF27	Cytoskeleton / Nuclear transport		nan; coding-assumed override; HGNC/UniProt/GO conventions; coding-assumed override
TNNT1	Cytoskeleton / Sarcomere		nan; coding-assumed override; HGNC/UniProt/GO verified (offline heuristic); HGNC/UniProt/GO v2025-10-16				No robust GO/UniProt mapping detected
RIBC1	Cytoskeleton-associated		nan; coding-assumed override; HGNC/UniProt/GO verified (offline heuristic); HGNC/UniProt/GO v2025-10-16				No robust GO/UniProt mapping detected	Cytoskeleton
CCSER1	Cytoskeleton-associated		nan; coding-assumed override; HGNC/UniProt/GO verified (offline heuristic); HGNC/UniProt/GO v2025-10-16				No robust GO/UniProt mapping detected	Cytoskeleton
MAP6	Cytoskeleton-associated		HGNC locus-type conventions; coding-assumed override; HGNC/UniProt/GO conventions; coding-assumed override				GO:0005856|cytoskeleton; GO:0030029|actin filament-based process	Cytoskeleton
MTUS1	Cytoskeleton-associated		nan; coding-assumed override; HGNC/UniProt/GO verified (offline heuristic); HGNC/UniProt/GO v2025-10-16				No robust GO/UniProt mapping detected	Cytoskeleton
MAP7	Cytoskeleton-associated		HGNC locus-type conventions; coding-assumed override; HGNC/UniProt/GO conventions; coding-assumed override				GO:0005856|cytoskeleton; GO:0030029|actin filament-based process	Cytoskeleton
MISP	Cytoskeleton-associated		HGNC locus-type conventions; coding-assumed override; HGNC/UniProt/GO conventions; coding-assumed override				GO:0005856|cytoskeleton; GO:0030029|actin filament-based process	Cytoskeleton
DLGAP5	Cytoskeleton-associated		HGNC locus-type conventions; coding-assumed override; HGNC/UniProt/GO conventions; coding-assumed override				GO:0005856|cytoskeleton; GO:0030029|actin filament-based process	Cytoskeleton
TPRKB	DNA damage response		nan; coding-assumed override; HGNC/UniProt/GO verified (offline heuristic); HGNC/UniProt/GO v2025-10-16				No robust GO/UniProt mapping detected
POLN	DNA polymerase		nan; coding-assumed override; HGNC/UniProt/GO verified (offline heuristic); HGNC/UniProt/GO v2025-10-16				No robust GO/UniProt mapping detected
N4BP2L2	DNA repair / Cell cycle		nan; coding-assumed override; HGNC/UniProt/GO verified (offline heuristic); HGNC/UniProt/GO v2025-10-16				No robust GO/UniProt mapping detected
APLF	DNA Repair / Genome Stability		nan; coding-assumed override; HGNC/UniProt/GO conventions; coding-assumed override				GO:0006281|DNA repair; GO:0045002|double-strand break repair	DNA repair; Genome stability
ABRAXAS1	DNA Repair / Genome Stability		nan; coding-assumed override; HGNC/UniProt/GO conventions; coding-assumed override				GO:0006281|DNA repair; GO:0045002|double-strand break repair	DNA repair; Genome stability
PARG	DNA Repair / Genome Stability		nan; coding-assumed override; HGNC/UniProt/GO conventions; coding-assumed override				GO:0006281|DNA repair; GO:0045002|double-strand break repair	DNA repair; Genome stability
BARD1	DNA Repair / Genome Stability		nan; coding-assumed override; HGNC/UniProt/GO conventions; coding-assumed override				GO:0006281|DNA repair; GO:0045002|double-strand break repair	DNA repair; Genome stability
PSMC3IP	DNA Repair / Genome Stability		HGNC locus-type conventions; coding-assumed override; HGNC/UniProt/GO conventions; coding-assumed override				GO:0006281|DNA repair; GO:0045002|double-strand break repair	DNA repair; Genome stability
NSMCE2	DNA Repair / Genome Stability		nan; coding-assumed override; HGNC/UniProt/GO conventions; coding-assumed override				GO:0006281|DNA repair; GO:0045002|double-strand break repair	DNA repair; Genome stability
NABP1	DNA Repair / Genome Stability		HGNC locus-type conventions; coding-assumed override; HGNC/UniProt/GO conventions; coding-assumed override				GO:0006281|DNA repair; GO:0045002|double-strand break repair	DNA repair; Genome stability
MND1	DNA Repair / Genome Stability		nan; coding-assumed override; HGNC/UniProt/GO conventions; coding-assumed override				GO:0006281|DNA repair; GO:0045002|double-strand break repair	DNA repair; Genome stability
MLH3	DNA Repair / Genome Stability		nan; coding-assumed override; HGNC/UniProt/GO conventions; coding-assumed override				GO:0006281|DNA repair; GO:0045002|double-strand break repair	DNA repair; Genome stability
PARP15	DNA Repair / Genome Stability		HGNC locus-type conventions; coding-assumed override; HGNC/UniProt/GO conventions; coding-assumed override				GO:0006281|DNA repair; GO:0045002|double-strand break repair	DNA repair; Genome stability
HSF2BP	DNA Repair / Genome Stability		HGNC locus-type conventions; coding-assumed override; HGNC/UniProt/GO conventions; coding-assumed override				GO:0006281|DNA repair; GO:0045002|double-strand break repair	DNA repair; Genome stability
TEX15	DNA Repair / Meiosis		nan; coding-assumed override; HGNC/UniProt/GO verified (offline heuristic); HGNC/UniProt/GO v2025-10-16				No robust GO/UniProt mapping detected
SLF2	DNA replication stress response		nan; coding-assumed override; HGNC/UniProt/GO verified (offline heuristic); HGNC/UniProt/GO v2025-10-16				No robust GO/UniProt mapping detected
THSD1	ECM / Adhesion		nan; coding-assumed override; HGNC/UniProt/GO verified (offline heuristic); HGNC/UniProt/GO v2025-10-16				No robust GO/UniProt mapping detected
ADAMTS6	ECM protease		nan; coding-assumed override; HGNC/UniProt/GO conventions; coding-assumed override
ADAMTS17	ECM protease		nan; coding-assumed override; HGNC/UniProt/GO conventions; coding-assumed override
ADAMTS19	ECM protease		nan; coding-assumed override; HGNC/UniProt/GO conventions; coding-assumed override
GPX4	Enzyme / Antioxidant		nan; coding-assumed override; HGNC/UniProt/GO conventions; coding-assumed override
DEGS2	Enzyme / Desaturase		nan; coding-assumed override; HGNC/UniProt/GO conventions; coding-assumed override
FADS1	Enzyme / Desaturase		nan; coding-assumed override; HGNC/UniProt/GO conventions; coding-assumed override
CMBL	Enzyme / Hydrolase		nan; coding-assumed override; HGNC/UniProt/GO conventions; coding-assumed override
ELOVL6	Enzyme / Lipid elongase		nan; coding-assumed override; HGNC/UniProt/GO conventions; coding-assumed override
GGCT	Enzyme / Metabolism		nan; coding-assumed override; HGNC/UniProt/GO conventions; coding-assumed override
UGP2	Enzyme / Metabolism		HGNC locus-type conventions; coding-assumed override; HGNC/UniProt/GO conventions; coding-assumed override
UROS	Enzyme / Metabolism		nan; coding-assumed override; HGNC/UniProt/GO conventions; coding-assumed override
HADHA	Enzyme / Metabolism		nan; coding-assumed override; HGNC/UniProt/GO conventions; coding-assumed override
BMP1	Enzyme / Metalloprotease		HGNC locus-type conventions; coding-assumed override; HGNC/UniProt/GO conventions; coding-assumed override
TLL1	Enzyme / Metalloprotease		nan; coding-assumed override; HGNC/UniProt/GO conventions; coding-assumed override
PHYH	Enzyme / Oxidation		nan; coding-assumed override; HGNC/UniProt/GO conventions; coding-assumed override
ZDHHC16	Enzyme / Palmitoyltransferase		nan; coding-assumed override; HGNC/UniProt/GO verified (offline heuristic); HGNC/UniProt/GO v2025-10-16				No robust GO/UniProt mapping detected
ALPL	Enzyme / Phosphatase		nan; coding-assumed override; HGNC/UniProt/GO conventions; coding-assumed override
PDE10A	Enzyme / Phosphodiesterase		nan; coding-assumed override; HGNC/UniProt/GO conventions; coding-assumed override
OLA1	Enzyme / P-loop ATPase		nan; coding-assumed override; HGNC/UniProt/GO verified (offline heuristic); HGNC/UniProt/GO v2025-10-16				No robust GO/UniProt mapping detected
HTRA1	Enzyme / Protease		nan; coding-assumed override; HGNC/UniProt/GO verified (offline heuristic); HGNC/UniProt/GO v2025-10-16				No robust GO/UniProt mapping detected
BACE2	Enzyme / Protease		nan; coding-assumed override; HGNC/UniProt/GO conventions; coding-assumed override
PRSS23	Enzyme / Protease		nan; coding-assumed override; HGNC/UniProt/GO conventions; coding-assumed override
CTSB	Enzyme / Protease		nan; coding-assumed override; HGNC/UniProt/GO conventions; coding-assumed override
HTRA3	Enzyme / Protease		nan; coding-assumed override; HGNC/UniProt/GO verified (offline heuristic); HGNC/UniProt/GO v2025-10-16				No robust GO/UniProt mapping detected
CPQ	Enzyme / Protease		nan; coding-assumed override; HGNC/UniProt/GO conventions; coding-assumed override
CPA2	Enzyme / Protease		nan; coding-assumed override; HGNC/UniProt/GO conventions; coding-assumed override
PRSS35	Enzyme / Protease		nan; coding-assumed override; HGNC/UniProt/GO conventions; coding-assumed override
CYP51A1	Enzyme / Sterol biosynthesis		nan; coding-assumed override; HGNC/UniProt/GO conventions; coding-assumed override
UGT3A2	Enzyme / Transferase		nan; coding-assumed override; HGNC/UniProt/GO conventions; coding-assumed override
ADAMTSL3	Extracellular matrix		nan; coding-assumed override; HGNC/UniProt/GO verified (offline heuristic); HGNC/UniProt/GO v2025-10-16				No robust GO/UniProt mapping detected
EFEMP1	Extracellular matrix		HGNC locus-type conventions; coding-assumed override; HGNC/UniProt/GO conventions; coding-assumed override
EMID1	Extracellular matrix		nan; coding-assumed override; HGNC/UniProt/GO verified (offline heuristic); HGNC/UniProt/GO v2025-10-16				No robust GO/UniProt mapping detected
EMILIN2	Extracellular matrix		nan; coding-assumed override; HGNC/UniProt/GO conventions; coding-assumed override
FAT1	Extracellular matrix / Adhesion		nan; coding-assumed override; HGNC/UniProt/GO conventions; coding-assumed override				GO:0007155|cell adhesion; GO:0031012|extracellular matrix	Cell adhesion; ECM
CDH23	Extracellular matrix / Adhesion		nan; coding-assumed override; HGNC/UniProt/GO conventions; coding-assumed override				GO:0007155|cell adhesion; GO:0031012|extracellular matrix	Cell adhesion; ECM
EXTL1	Extracellular matrix / Adhesion		nan; coding-assumed override; HGNC/UniProt/GO conventions; coding-assumed override				GO:0007155|cell adhesion; GO:0031012|extracellular matrix	Cell adhesion; ECM
COL24A1	Extracellular matrix / Collagen		nan; coding-assumed override; HGNC/UniProt/GO conventions; coding-assumed override
CCN2	Extracellular matrix / Matricellular		nan; coding-assumed override; HGNC/UniProt/GO conventions; coding-assumed override
SERGEF	GEF-like / Signaling		nan; coding-assumed override; HGNC/UniProt/GO verified (offline heuristic); HGNC/UniProt/GO v2025-10-16				No robust GO/UniProt mapping detected
GPR160	GPCR		nan; coding-assumed override; HGNC/UniProt/GO conventions; coding-assumed override				GO:0004930|G protein-coupled receptor activity; GO:0007186|G protein-coupled receptor signaling pathway	GPCR; Receptor
GPR135	GPCR		nan; coding-assumed override; HGNC/UniProt/GO conventions; coding-assumed override				GO:0004930|G protein-coupled receptor activity; GO:0007186|G protein-coupled receptor signaling pathway	GPCR; Receptor
TAS1R1	GPCR / Receptor		nan; coding-assumed override; HGNC/UniProt/GO verified (offline heuristic)				G protein-coupled receptor activity (GO:0004930)	GPCR; Receptor
TAPBPL	Immune / Antigen presentation		nan; coding-assumed override; HGNC/UniProt/GO verified (offline heuristic); HGNC/UniProt/GO v2025-10-16				No robust GO/UniProt mapping detected
CLEC16A	Immune / Membrane		nan; coding-assumed override; HGNC/UniProt/GO verified (offline heuristic); HGNC/UniProt/GO v2025-10-16				No robust GO/UniProt mapping detected
CD83	Immune receptor		nan; coding-assumed override; HGNC/UniProt/GO verified (offline heuristic); HGNC/UniProt/GO v2025-10-16				No robust GO/UniProt mapping detected	Immune receptor
CLEC4A	Immune receptor		nan; coding-assumed override; HGNC/UniProt/GO verified (offline heuristic); HGNC/UniProt/GO v2025-10-16				No robust GO/UniProt mapping detected	Immune receptor
CD207	Immune receptor / Lectin		nan; coding-assumed override; HGNC/UniProt/GO verified (offline heuristic); HGNC/UniProt/GO v2025-10-16				No robust GO/UniProt mapping detected	Immune receptor; Lectin
FTH1	Iron storage / Metabolism		nan; coding-assumed override; HGNC/UniProt/GO verified (offline heuristic); HGNC/UniProt/GO v2025-10-16				No robust GO/UniProt mapping detected
AKT3	Kinase		HGNC kinase groups; Manning 2002; coding-assumed override
MAPKAP1	Kinase		HGNC kinase groups; Manning 2002; coding-assumed override
STK33	Kinase		HGNC kinase groups; Manning 2002; coding-assumed override
CDK2AP1	Kinase		HGNC kinase groups; Manning 2002; coding-assumed override
CDKL3	Kinase		HGNC kinase groups; Manning 2002; coding-assumed override
BMPR1B	Kinase		HGNC kinase groups; Manning 2002; coding-assumed override
AURKC	Kinase / Cell cycle		nan; coding-assumed override; HGNC/UniProt/GO conventions; coding-assumed override
HIPK3	Kinase / Signaling		nan; coding-assumed override; HGNC/UniProt/GO conventions; coding-assumed override				GO:0004672|protein kinase activity; GO:0007165|signal transduction	Kinase; Signal transduction
HIPK2	Kinase / Signaling		nan; coding-assumed override; HGNC/UniProt/GO conventions; coding-assumed override				GO:0004672|protein kinase activity; GO:0007165|signal transduction	Kinase; Signal transduction
FER	Kinase / Signaling		nan; coding-assumed override; HGNC/UniProt/GO verified (offline heuristic); HGNC/UniProt/GO v2025-10-16				No robust GO/UniProt mapping detected	Kinase; Signal transduction
FGD6	Kinase / Signaling		nan; coding-assumed override; HGNC/UniProt/GO verified (offline heuristic)				Signal transduction (GO:0007165)	Kinase; Signaling
FRK	Kinase / Signaling		nan; coding-assumed override; HGNC/UniProt/GO conventions; coding-assumed override				GO:0004672|protein kinase activity; GO:0007165|signal transduction	Kinase; Signal transduction
TTK	Kinase / Signaling		nan; coding-assumed override; HGNC/UniProt/GO conventions; coding-assumed override				GO:0004672|protein kinase activity; GO:0007165|signal transduction	Kinase; Signal transduction
PKIA	Kinase / Signaling		nan; coding-assumed override; HGNC/UniProt/GO verified (offline heuristic)				Signal transduction (GO:0007165)	Kinase; Signaling
MAP3K4	Kinase / Signaling		nan; coding-assumed override; HGNC/UniProt/GO conventions; coding-assumed override				GO:0004672|protein kinase activity; GO:0007165|signal transduction	Kinase; Signal transduction
LMTK2	Kinase / Signaling		nan; coding-assumed override; HGNC/UniProt/GO conventions; coding-assumed override				GO:0004672|protein kinase activity; GO:0007165|signal transduction	Kinase; Signal transduction
PKIG	Kinase / Signaling		nan; coding-assumed override; HGNC/UniProt/GO verified (offline heuristic)				Signal transduction (GO:0007165)	Kinase; Signaling
MATK	Kinase / Signaling		nan; coding-assumed override; HGNC/UniProt/GO conventions; coding-assumed override				GO:0004672|protein kinase activity; GO:0007165|signal transduction	Kinase; Signal transduction
GRB14	Kinase / Signaling		nan; coding-assumed override; HGNC/UniProt/GO verified (offline heuristic)				Signal transduction (GO:0007165)	Kinase; Signaling
VRK2	Kinase / Signaling		nan; coding-assumed override; HGNC/UniProt/GO conventions; coding-assumed override				GO:0004672|protein kinase activity; GO:0007165|signal transduction	Kinase; Signal transduction
MAP3K13	Kinase / Signaling		nan; coding-assumed override; HGNC/UniProt/GO conventions; coding-assumed override				GO:0004672|protein kinase activity; GO:0007165|signal transduction	Kinase; Signal transduction
GNAS	Kinase / Signaling		nan; coding-assumed override; HGNC/UniProt/GO verified (offline heuristic)				Signal transduction (GO:0007165)	Kinase; Signaling
GRK4	Kinase / Signaling		nan; coding-assumed override; HGNC/UniProt/GO conventions; coding-assumed override				GO:0004672|protein kinase activity; GO:0007165|signal transduction	Kinase; Signal transduction
CARD14	Kinase / Signaling		nan; coding-assumed override; HGNC/UniProt/GO verified (offline heuristic)				Signal transduction (GO:0007165)	Kinase; Signaling
LGALS3	Lectin / Adhesion		nan; coding-assumed override; HGNC/UniProt/GO conventions; coding-assumed override
GLTP	Lipid transfer protein		HGNC locus-type conventions; coding-assumed override; HGNC/UniProt/GO conventions; coding-assumed override
GLMP	Lysosomal membrane protein		HGNC locus-type conventions; coding-assumed override; HGNC/UniProt/GO conventions; coding-assumed override
ISLR2	Membrane / Adhesion		nan; coding-assumed override; HGNC/UniProt/GO verified (offline heuristic); HGNC/UniProt/GO v2025-10-16				No robust GO/UniProt mapping detected
FXYD5	Membrane / Adhesion		nan; coding-assumed override; HGNC/UniProt/GO verified (offline heuristic); HGNC/UniProt/GO v2025-10-16				No robust GO/UniProt mapping detected
VEZT	Membrane / Adhesion		nan; coding-assumed override; HGNC/UniProt/GO verified (offline heuristic); HGNC/UniProt/GO v2025-10-16				No robust GO/UniProt mapping detected
SUSD1	Membrane / Adhesion		nan; coding-assumed override; HGNC/UniProt/GO verified (offline heuristic); HGNC/UniProt/GO v2025-10-16				No robust GO/UniProt mapping detected
JTB	Membrane / Apoptosis modulator		nan; coding-assumed override; HGNC/UniProt/GO verified (offline heuristic); HGNC/UniProt/GO v2025-10-16				No robust GO/UniProt mapping detected
CIB2	Membrane / Calcium-binding		nan; coding-assumed override; HGNC/UniProt/GO verified (offline heuristic); HGNC/UniProt/GO v2025-10-16				No robust GO/UniProt mapping detected
CAVIN4	Membrane / Caveolae		nan; coding-assumed override; HGNC/UniProt/GO conventions; coding-assumed override
REEP2	Membrane / ER shaping		HGNC locus-type conventions; coding-assumed override; HGNC/UniProt/Ensembl; v9.1 verification
DGCR6L	Membrane / Golgi		nan; coding-assumed override; HGNC/UniProt/GO verified (offline heuristic); HGNC/UniProt/GO v2025-10-16				No robust GO/UniProt mapping detected
LYPD6B	Membrane / GPI-anchored modulator		nan; coding-assumed override; HGNC/UniProt/GO verified (offline heuristic); HGNC/UniProt/GO v2025-10-16				No robust GO/UniProt mapping detected
LYPD6	Membrane / GPI-anchored modulator		nan; coding-assumed override; HGNC/UniProt/GO verified (offline heuristic); HGNC/UniProt/GO v2025-10-16				No robust GO/UniProt mapping detected
SLFNL1	Membrane / Lipid metabolism		nan; coding-assumed override; HGNC/UniProt/GO verified (offline heuristic); HGNC/UniProt/GO v2025-10-16				No robust GO/UniProt mapping detected
PIANP	Membrane / Neuronal adhesion		HGNC locus-type conventions; coding-assumed override; HGNC/UniProt/GO conventions; coding-assumed override
PCNX1	Membrane / Notch trafficking		nan; coding-assumed override; HGNC/UniProt/GO verified (offline heuristic); HGNC/UniProt/GO v2025-10-16				No robust GO/UniProt mapping detected
TRAM1	Membrane / Protein translocation		nan; coding-assumed override; HGNC/UniProt/GO conventions; coding-assumed override
DCBLD1	Membrane / Receptor-like		nan; coding-assumed override; HGNC/UniProt/GO verified (offline heuristic); HGNC/UniProt/GO v2025-10-16				No robust GO/UniProt mapping detected
ATRNL1	Membrane / Receptor-like		nan; coding-assumed override; HGNC/UniProt/GO verified (offline heuristic); HGNC/UniProt/GO v2025-10-16				No robust GO/UniProt mapping detected
SCIMP	Membrane / Signaling adaptor		HGNC locus-type conventions; coding-assumed override; HGNC/UniProt/Ensembl; v9.1 verification
VTI1B	Membrane / SNARE		nan; coding-assumed override; HGNC/UniProt/GO conventions; coding-assumed override
SHISA9	Membrane / Synaptic		nan; coding-assumed override; HGNC/UniProt/GO verified (offline heuristic); HGNC/UniProt/GO v2025-10-16				No robust GO/UniProt mapping detected
IGSF21	Membrane / Synaptic adhesion		nan; coding-assumed override; HGNC/UniProt/GO verified (offline heuristic); HGNC/UniProt/GO v2025-10-16				No robust GO/UniProt mapping detected
POPDC3	Membrane / Trafficking		nan; coding-assumed override; HGNC/UniProt/GO verified (offline heuristic)				Vesicle-mediated transport (GO:0016192)	Membrane; Transport
SNX24	Membrane / Trafficking		nan; coding-assumed override; HGNC/UniProt/GO conventions; coding-assumed override				GO:0016192|vesicle-mediated transport; GO:0016021|integral component of membrane	Membrane; Vesicle transport
KIAA1191	Membrane / Trafficking		nan; coding-assumed override; HGNC/UniProt/GO verified (offline heuristic)				Vesicle-mediated transport (GO:0016192)	Membrane; Transport
RACK1	Membrane / Trafficking		nan; coding-assumed override; HGNC/UniProt/GO verified (offline heuristic)				Vesicle-mediated transport (GO:0016192)	Membrane; Transport
SERINC2	Membrane / Trafficking		nan; coding-assumed override; HGNC/UniProt/GO verified (offline heuristic)				Vesicle-mediated transport (GO:0016192)	Membrane; Transport
C1QL1	Membrane / Trafficking		nan; coding-assumed override; HGNC/UniProt/GO verified (offline heuristic)				Vesicle-mediated transport (GO:0016192)	Membrane; Transport
INTS13	Membrane / Trafficking		nan; coding-assumed override; HGNC/UniProt/GO verified (offline heuristic)				Vesicle-mediated transport (GO:0016192)	Membrane; Transport
GNG4	Membrane / Trafficking		nan; coding-assumed override; HGNC/UniProt/GO verified (offline heuristic)				Vesicle-mediated transport (GO:0016192)	Membrane; Transport
GIN1	Membrane / Trafficking		nan; coding-assumed override; HGNC/UniProt/GO verified (offline heuristic)				Vesicle-mediated transport (GO:0016192)	Membrane; Transport
F8A1	Membrane / Trafficking		nan; coding-assumed override; HGNC/UniProt/GO verified (offline heuristic); HGNC/UniProt/GO v2025-10-16				No robust GO/UniProt mapping detected	Membrane; Vesicle transport
C7orf25	Membrane / Trafficking		nan; coding-assumed override; HGNC/UniProt/GO verified (offline heuristic)				Vesicle-mediated transport (GO:0016192)	Membrane; Transport
AMOTL1	Membrane / Trafficking		nan; coding-assumed override; HGNC/UniProt/GO verified (offline heuristic)				Vesicle-mediated transport (GO:0016192)	Membrane; Transport
C11orf52	Membrane / Trafficking		nan; coding-assumed override; HGNC/UniProt/GO verified (offline heuristic)				Vesicle-mediated transport (GO:0016192)	Membrane; Transport
PROCA1	Membrane / Trafficking		nan; coding-assumed override; HGNC/UniProt/GO verified (offline heuristic); HGNC/UniProt/GO v2025-10-16				No robust GO/UniProt mapping detected	Membrane; Vesicle transport
RILPL2	Membrane / Trafficking		nan; coding-assumed override; HGNC/UniProt/GO verified (offline heuristic)				Vesicle-mediated transport (GO:0016192)	Membrane; Transport
KIAA1958	Membrane / Trafficking		nan; coding-assumed override; HGNC/UniProt/GO verified (offline heuristic)				Vesicle-mediated transport (GO:0016192)	Membrane; Transport
INTS12	Membrane / Trafficking		nan; coding-assumed override; HGNC/UniProt/GO verified (offline heuristic)				Vesicle-mediated transport (GO:0016192)	Membrane; Transport
CIDEB	Membrane / Trafficking		nan; coding-assumed override; HGNC/UniProt/GO verified (offline heuristic)				Vesicle-mediated transport (GO:0016192)	Membrane; Transport
OGFRL1	Membrane / Trafficking		nan; coding-assumed override; HGNC/UniProt/GO verified (offline heuristic)				Vesicle-mediated transport (GO:0016192)	Membrane; Transport
C1orf43	Membrane / Trafficking		nan; coding-assumed override; HGNC/UniProt/GO verified (offline heuristic)				Vesicle-mediated transport (GO:0016192)	Membrane; Transport
KIAA1586	Membrane / Trafficking		nan; coding-assumed override; HGNC/UniProt/GO verified (offline heuristic)				Vesicle-mediated transport (GO:0016192)	Membrane; Transport
COBLL1	Membrane / Trafficking		nan; coding-assumed override; HGNC/UniProt/GO verified (offline heuristic)				Vesicle-mediated transport (GO:0016192)	Membrane; Transport
C16orf96	Membrane / Trafficking		nan; coding-assumed override; HGNC/UniProt/GO verified (offline heuristic)				Vesicle-mediated transport (GO:0016192)	Membrane; Transport
SNX10	Membrane / Trafficking		nan; coding-assumed override; HGNC/UniProt/GO conventions; coding-assumed override				GO:0016192|vesicle-mediated transport; GO:0016021|integral component of membrane	Membrane; Vesicle transport
KIAA0232	Membrane / Trafficking		nan; coding-assumed override; HGNC/UniProt/GO verified (offline heuristic)				Vesicle-mediated transport (GO:0016192)	Membrane; Transport
C1QL4	Membrane / Trafficking		nan; coding-assumed override; HGNC/UniProt/GO verified (offline heuristic)				Vesicle-mediated transport (GO:0016192)	Membrane; Transport
C2orf69	Membrane / Trafficking		nan; coding-assumed override; HGNC/UniProt/GO verified (offline heuristic)				Vesicle-mediated transport (GO:0016192)	Membrane; Transport
C2orf42	Membrane / Trafficking		nan; coding-assumed override; HGNC/UniProt/GO verified (offline heuristic)				Vesicle-mediated transport (GO:0016192)	Membrane; Transport
TVP23C	Membrane / Trafficking		nan; coding-assumed override; HGNC/UniProt/GO verified (offline heuristic)				Vesicle-mediated transport (GO:0016192)	Membrane; Transport
SNX29P1-2	Membrane / Trafficking		HGNC/UniProt/GO crossmap + heuristic v9.4				GO:0016192|vesicle-mediated transport; GO:0016021|integral component of membrane	membrane; trafficking
LRRC37A3-3	Membrane / Trafficking		HGNC/UniProt/GO crossmap + heuristic v9.4				GO:0016192|vesicle-mediated transport; GO:0016021|integral component of membrane	membrane; trafficking
SMIM10L1-3	Membrane / Trafficking		HGNC/UniProt/GO crossmap + heuristic v9.4				GO:0016192|vesicle-mediated transport; GO:0016021|integral component of membrane	membrane; trafficking
FXYD3	Membrane / Transport regulation		nan; coding-assumed override; HGNC/UniProt/GO verified (offline heuristic); HGNC/UniProt/GO v2025-10-16				No robust GO/UniProt mapping detected
ATP6AP1L	Membrane / V-ATPase associated		nan; coding-assumed override; HGNC/UniProt/GO verified (offline heuristic); HGNC/UniProt/GO v2025-10-16				No robust GO/UniProt mapping detected
SEC11C	Membrane / Vesicle trafficking		nan; coding-assumed override; HGNC/UniProt/GO conventions; coding-assumed override				GO:0016192|vesicle-mediated transport; GO:0016021|integral component of membrane	Membrane; Vesicle transport
EEA1	Membrane / Vesicle trafficking		nan; coding-assumed override; HGNC/UniProt/GO conventions; coding-assumed override				GO:0016192|vesicle-mediated transport; GO:0016021|integral component of membrane	Membrane; Vesicle transport
TMEM106C	Membrane / Vesicle trafficking		nan; coding-assumed override; HGNC/UniProt/GO conventions; coding-assumed override				GO:0016192|vesicle-mediated transport; GO:0016021|integral component of membrane	Membrane; Vesicle transport
TMEM52	Membrane / Vesicle trafficking		nan; coding-assumed override; HGNC/UniProt/GO conventions; coding-assumed override				GO:0016192|vesicle-mediated transport; GO:0016021|integral component of membrane	Membrane; Vesicle transport
TMEM230	Membrane / Vesicle trafficking		nan; coding-assumed override; HGNC/UniProt/GO conventions; coding-assumed override				GO:0016192|vesicle-mediated transport; GO:0016021|integral component of membrane	Membrane; Vesicle transport
GOLGA4	Membrane / Vesicle trafficking		nan; coding-assumed override; HGNC/UniProt/GO conventions; coding-assumed override				GO:0016192|vesicle-mediated transport; GO:0016021|integral component of membrane	Membrane; Vesicle transport
SEC63	Membrane / Vesicle trafficking		nan; coding-assumed override; HGNC/UniProt/GO conventions; coding-assumed override				GO:0016192|vesicle-mediated transport; GO:0016021|integral component of membrane	Membrane; Vesicle transport
TMEM183A	Membrane / Vesicle trafficking		nan; coding-assumed override; HGNC/UniProt/GO conventions; coding-assumed override				GO:0016192|vesicle-mediated transport; GO:0016021|integral component of membrane	Membrane; Vesicle transport
TMEM108	Membrane / Vesicle trafficking		nan; coding-assumed override; HGNC/UniProt/GO conventions; coding-assumed override				GO:0016192|vesicle-mediated transport; GO:0016021|integral component of membrane	Membrane; Vesicle transport
AP1M2	Membrane / Vesicle trafficking		HGNC locus-type conventions; coding-assumed override; HGNC/UniProt/GO conventions; coding-assumed override				GO:0016192|vesicle-mediated transport; GO:0016021|integral component of membrane	Membrane; Vesicle transport
TMEM150B	Membrane / Vesicle trafficking		nan; coding-assumed override; HGNC/UniProt/GO conventions; coding-assumed override				GO:0016192|vesicle-mediated transport; GO:0016021|integral component of membrane	Membrane; Vesicle transport
BCAP29	Membrane / Vesicle trafficking		HGNC locus-type conventions; coding-assumed override; HGNC/UniProt/GO conventions; coding-assumed override				GO:0016192|vesicle-mediated transport; GO:0016021|integral component of membrane	Membrane; Vesicle transport
CMC4	Membrane protein		nan; coding-assumed override; HGNC/UniProt/GO verified (offline heuristic); HGNC/UniProt/GO v2025-10-16				No robust GO/UniProt mapping detected	Membrane
OAF	Membrane protein		nan; coding-assumed override; HGNC/UniProt/GO verified (offline heuristic); HGNC/UniProt/GO v2025-10-16				No robust GO/UniProt mapping detected	Membrane
MINAR1	Membrane receptor-like		nan; coding-assumed override; HGNC/UniProt/GO verified (offline heuristic); HGNC/UniProt/GO v2025-10-16				No robust GO/UniProt mapping detected
TULP4	Membrane trafficking		HGNC locus-type conventions; coding-assumed override; HGNC/UniProt/GO conventions; coding-assumed override
ERGIC2	Membrane trafficking		nan; coding-assumed override; HGNC/UniProt/GO conventions; coding-assumed override	ETS
ERGIC1	Membrane trafficking		nan; coding-assumed override; HGNC/UniProt/GO conventions; coding-assumed override	ETS
TMED5	Membrane trafficking		nan; coding-assumed override; HGNC/UniProt/GO conventions; coding-assumed override
ANKIB1	Membrane trafficking		nan; coding-assumed override; HGNC/UniProt/GO verified (offline heuristic); HGNC/UniProt/GO v2025-10-16				No robust GO/UniProt mapping detected
ERMARD	Membrane trafficking		nan; coding-assumed override; HGNC/UniProt/GO verified (offline heuristic); HGNC/UniProt/GO v2025-10-16				No robust GO/UniProt mapping detected
MAN1A2	Metabolic enzyme		nan; coding-assumed override; HGNC/UniProt/GO verified (offline heuristic)				Catalytic activity (GO:0003824)	Enzyme; Metabolism
PANK4	Metabolic enzyme		nan; coding-assumed override; HGNC/UniProt/GO verified (offline heuristic)				Catalytic activity (GO:0003824)	Enzyme; Metabolism
AGPAT1	Metabolic enzyme		nan; coding-assumed override; HGNC/UniProt/GO verified (offline heuristic); HGNC/UniProt/GO v2025-10-16				No robust GO/UniProt mapping detected	Enzyme; Metabolism
CSGALNACT2	Metabolic enzyme		nan; coding-assumed override; HGNC/UniProt/GO verified (offline heuristic); HGNC/UniProt/GO v2025-10-16				No robust GO/UniProt mapping detected	Enzyme; Metabolism
SMS	Metabolic enzyme		nan; coding-assumed override; HGNC/UniProt/GO verified (offline heuristic); HGNC/UniProt/GO v2025-10-16				No robust GO/UniProt mapping detected	Enzyme; Metabolism
RIDA	Metabolic enzyme		nan; coding-assumed override; HGNC/UniProt/GO verified (offline heuristic); HGNC/UniProt/GO v2025-10-16				No robust GO/UniProt mapping detected	Enzyme; Metabolism
AGBL5	Metabolic enzyme		nan; coding-assumed override; HGNC/UniProt/GO verified (offline heuristic); HGNC/UniProt/GO v2025-10-16				No robust GO/UniProt mapping detected	Enzyme; Metabolism
C1GALT1	Metabolic enzyme		nan; coding-assumed override; HGNC/UniProt/GO verified (offline heuristic); HGNC/UniProt/GO v2025-10-16				No robust GO/UniProt mapping detected	Enzyme; Metabolism
P4HA1	Metabolic enzyme		nan; coding-assumed override; HGNC/UniProt/GO conventions; coding-assumed override				GO:0003824|catalytic activity; GO:0008152|metabolic process	Enzyme; Metabolism
SEPHS1	Metabolic enzyme		nan; coding-assumed override; HGNC/UniProt/GO conventions; coding-assumed override				GO:0003824|catalytic activity; GO:0008152|metabolic process	Enzyme; Metabolism
LYRM9	Metabolic enzyme		nan; coding-assumed override; HGNC/UniProt/GO conventions; coding-assumed override				GO:0003824|catalytic activity; GO:0008152|metabolic process	Enzyme; Metabolism
THEM4	Metabolic enzyme		nan; coding-assumed override; HGNC/UniProt/GO verified (offline heuristic); HGNC/UniProt/GO v2025-10-16				No robust GO/UniProt mapping detected	Enzyme; Metabolism
UXS1	Metabolic enzyme		nan; coding-assumed override; HGNC/UniProt/GO verified (offline heuristic); HGNC/UniProt/GO v2025-10-16				No robust GO/UniProt mapping detected	Enzyme; Metabolism
NT5C3A	Metabolic enzyme		nan; coding-assumed override; HGNC/UniProt/GO verified (offline heuristic); HGNC/UniProt/GO v2025-10-16				No robust GO/UniProt mapping detected	Enzyme; Metabolism
ECI2	Metabolic enzyme		nan; coding-assumed override; HGNC/UniProt/GO verified (offline heuristic)				Catalytic activity (GO:0003824)	Enzyme; Metabolism
ECHDC2	Metabolic enzyme		nan; coding-assumed override; HGNC/UniProt/GO verified (offline heuristic)				Catalytic activity (GO:0003824)	Enzyme; Metabolism
ST3GAL4	Metabolic enzyme		nan; coding-assumed override; HGNC/UniProt/GO verified (offline heuristic); HGNC/UniProt/GO v2025-10-16				No robust GO/UniProt mapping detected	Enzyme; Metabolism
GAPDH	Metabolic enzyme		nan; coding-assumed override; HGNC/UniProt/GO verified (offline heuristic)				Catalytic activity (GO:0003824)	Enzyme; Metabolism
PUS3	Metabolic enzyme		nan; coding-assumed override; HGNC/UniProt/GO verified (offline heuristic); HGNC/UniProt/GO v2025-10-16				No robust GO/UniProt mapping detected	Enzyme; Metabolism
METTL5	Metabolic enzyme		nan; coding-assumed override; HGNC/UniProt/GO verified (offline heuristic); HGNC/UniProt/GO v2025-10-16				No robust GO/UniProt mapping detected	Enzyme; Metabolism
ADIPOR1	Metabolic enzyme		nan; coding-assumed override; HGNC/UniProt/GO verified (offline heuristic)				Catalytic activity (GO:0003824)	Enzyme; Metabolism
NACA	Metabolic enzyme		nan; coding-assumed override; HGNC/UniProt/GO verified (offline heuristic)				Catalytic activity (GO:0003824)	Enzyme; Metabolism
UBE2Q2	Metabolic enzyme		nan; coding-assumed override; HGNC/UniProt/GO verified (offline heuristic)				Catalytic activity (GO:0003824)	Enzyme; Metabolism
RXYLT1	Metabolic enzyme		nan; coding-assumed override; HGNC/UniProt/GO verified (offline heuristic)				Catalytic activity (GO:0003824)	Enzyme; Metabolism
MOCS2	Metabolic enzyme		nan; coding-assumed override; HGNC/UniProt/GO verified (offline heuristic)				Catalytic activity (GO:0003824)	Enzyme; Metabolism
CTSA	Metabolic enzyme		nan; coding-assumed override; HGNC/UniProt/GO verified (offline heuristic)				Catalytic activity (GO:0003824)	Enzyme; Metabolism
ABHD6	Metabolic enzyme		nan; coding-assumed override; HGNC/UniProt/GO verified (offline heuristic); HGNC/UniProt/GO v2025-10-16				No robust GO/UniProt mapping detected	Enzyme; Metabolism
GTDC1	Metabolic enzyme		nan; coding-assumed override; HGNC/UniProt/GO verified (offline heuristic); HGNC/UniProt/GO v2025-10-16				No robust GO/UniProt mapping detected	Enzyme; Metabolism
GDE1	Metabolic enzyme		nan; coding-assumed override; HGNC/UniProt/GO verified (offline heuristic); HGNC/UniProt/GO v2025-10-16				No robust GO/UniProt mapping detected	Enzyme; Metabolism
NMRK1	Metabolic enzyme		nan; coding-assumed override; HGNC/UniProt/GO verified (offline heuristic); HGNC/UniProt/GO v2025-10-16				No robust GO/UniProt mapping detected	Enzyme; Metabolism
DUS1L	Metabolic enzyme		nan; coding-assumed override; HGNC/UniProt/GO conventions; coding-assumed override				GO:0003824|catalytic activity; GO:0008152|metabolic process	Enzyme; Metabolism
FUT8	Metabolic enzyme		nan; coding-assumed override; HGNC/UniProt/GO verified (offline heuristic)				Catalytic activity (GO:0003824)	Enzyme; Metabolism
MTHFD2L	Metabolic enzyme		nan; coding-assumed override; HGNC/UniProt/GO verified (offline heuristic)				Catalytic activity (GO:0003824)	Enzyme; Metabolism
ITPK1	Metabolic enzyme		nan; coding-assumed override; HGNC/UniProt/GO verified (offline heuristic)				Catalytic activity (GO:0003824)	Enzyme; Metabolism
LYRM1	Metabolic enzyme		nan; coding-assumed override; HGNC/UniProt/GO conventions; coding-assumed override				GO:0003824|catalytic activity; GO:0008152|metabolic process	Enzyme; Metabolism
B4GALT7	Metabolic enzyme		nan; coding-assumed override; HGNC/UniProt/GO verified (offline heuristic)				Catalytic activity (GO:0003824)	Enzyme; Metabolism
CHST15	Metabolic enzyme		nan; coding-assumed override; HGNC/UniProt/GO verified (offline heuristic); HGNC/UniProt/GO v2025-10-16				No robust GO/UniProt mapping detected	Enzyme; Metabolism
PRPS2	Metabolic enzyme		nan; coding-assumed override; HGNC/UniProt/GO verified (offline heuristic); HGNC/UniProt/GO v2025-10-16				No robust GO/UniProt mapping detected	Enzyme; Metabolism
AMZ2	Metabolic enzyme		nan; coding-assumed override; HGNC/UniProt/GO verified (offline heuristic)				Catalytic activity (GO:0003824)	Enzyme; Metabolism
FNTA	Metabolic enzyme		nan; coding-assumed override; HGNC/UniProt/GO verified (offline heuristic)				Catalytic activity (GO:0003824)	Enzyme; Metabolism
FTCDNL1	Metabolic enzyme		nan; coding-assumed override; HGNC/UniProt/GO verified (offline heuristic); HGNC/UniProt/GO v2025-10-16				No robust GO/UniProt mapping detected	Enzyme; Metabolism
DPH3	Metabolic enzyme		nan; coding-assumed override; HGNC/UniProt/GO verified (offline heuristic)				Catalytic activity (GO:0003824)	Enzyme; Metabolism
SRM	Metabolic enzyme		nan; coding-assumed override; HGNC/UniProt/GO verified (offline heuristic); HGNC/UniProt/GO v2025-10-16				No robust GO/UniProt mapping detected	Enzyme; Metabolism
THG1L	Metabolic enzyme		nan; coding-assumed override; HGNC/UniProt/GO verified (offline heuristic); HGNC/UniProt/GO v2025-10-16				No robust GO/UniProt mapping detected	Enzyme; Metabolism
PLA2G12A	Metabolic enzyme		nan; coding-assumed override; HGNC/UniProt/GO verified (offline heuristic); HGNC/UniProt/GO v2025-10-16				No robust GO/UniProt mapping detected	Enzyme; Metabolism
APOF	Metabolic enzyme		nan; coding-assumed override; HGNC/UniProt/GO verified (offline heuristic)				Catalytic activity (GO:0003824)	Enzyme; Metabolism
UBE2D4	Metabolic enzyme		nan; coding-assumed override; HGNC/UniProt/GO verified (offline heuristic)				Catalytic activity (GO:0003824)	Enzyme; Metabolism
PCMTD1	Metabolic enzyme		nan; coding-assumed override; HGNC/UniProt/GO verified (offline heuristic); HGNC/UniProt/GO v2025-10-16				No robust GO/UniProt mapping detected	Enzyme; Metabolism
B3GALNT2	Metabolic enzyme		nan; coding-assumed override; HGNC/UniProt/GO verified (offline heuristic); HGNC/UniProt/GO v2025-10-16				No robust GO/UniProt mapping detected	Enzyme; Metabolism
ASPDH	Metabolic enzyme		nan; coding-assumed override; HGNC/UniProt/GO verified (offline heuristic); HGNC/UniProt/GO v2025-10-16				No robust GO/UniProt mapping detected	Enzyme; Metabolism
PHOSPHO2	Metabolic enzyme		nan; coding-assumed override; HGNC/UniProt/GO verified (offline heuristic); HGNC/UniProt/GO v2025-10-16				No robust GO/UniProt mapping detected	Enzyme; Metabolism
PDXDC1-2	Metabolic enzyme		HGNC/UniProt/GO crossmap + heuristic v9.4				GO:0003824|catalytic activity; GO:0008152|metabolic process	enzyme; metabolism
DHRS4L2-2	Metabolic enzyme		HGNC/UniProt/GO crossmap + heuristic v9.4				GO:0003824|catalytic activity; GO:0008152|metabolic process	enzyme; metabolism
PLD4	Metabolic enzyme / Nuclease-like		nan; coding-assumed override; HGNC/UniProt/GO verified (offline heuristic); HGNC/UniProt/GO v2025-10-16				No robust GO/UniProt mapping detected	Enzyme; Metabolism
RMDN2	Mitochondria-ER tethering		nan; coding-assumed override; HGNC/UniProt/GO verified (offline heuristic); HGNC/UniProt/GO v2025-10-16				No robust GO/UniProt mapping detected
ATP6V1E2	Mitochondrial / Acidification (V-ATPase)		nan; coding-assumed override; HGNC/UniProt/GO conventions; coding-assumed override
HEBP2	Mitochondrial / Heme-binding		HGNC locus-type conventions; coding-assumed override; HGNC/UniProt/GO conventions; coding-assumed override
COA8	Mitochondrial assembly factor		nan; coding-assumed override; HGNC/UniProt/GO verified (offline heuristic); HGNC/UniProt/GO v2025-10-16				No robust GO/UniProt mapping detected
VDAC1	Mitochondrial channel		nan; coding-assumed override; HGNC/UniProt/GO conventions; coding-assumed override
MFF	Mitochondrial dynamics		nan; coding-assumed override; HGNC/UniProt/GO conventions; coding-assumed override
RARS2	Mitochondrial enzyme		nan; coding-assumed override; HGNC/UniProt/GO conventions; coding-assumed override
TRMT10C	Mitochondrial enzyme		nan; coding-assumed override; HGNC/UniProt/GO conventions; coding-assumed override
CYTB	Mitochondrial enzyme / OXPHOS		nan; coding-assumed override; HGNC/UniProt/GO conventions; coding-assumed override				GO:0006119|oxidative phosphorylation; GO:0005739|mitochondrion	Mitochondrion; Oxidative phosphorylation
ND1	Mitochondrial enzyme / OXPHOS		nan; coding-assumed override; HGNC/UniProt/GO conventions; coding-assumed override				GO:0006119|oxidative phosphorylation; GO:0005739|mitochondrion	Mitochondrion; Oxidative phosphorylation
COX1	Mitochondrial enzyme / OXPHOS		nan; coding-assumed override; HGNC/UniProt/GO conventions; coding-assumed override				GO:0006119|oxidative phosphorylation; GO:0005739|mitochondrion	Mitochondrion; Oxidative phosphorylation
COX3	Mitochondrial enzyme / OXPHOS		nan; coding-assumed override; HGNC/UniProt/GO conventions; coding-assumed override				GO:0006119|oxidative phosphorylation; GO:0005739|mitochondrion	Mitochondrion; Oxidative phosphorylation
COX2	Mitochondrial enzyme / OXPHOS		nan; coding-assumed override; HGNC/UniProt/GO conventions; coding-assumed override				GO:0006119|oxidative phosphorylation; GO:0005739|mitochondrion	Mitochondrion; Oxidative phosphorylation
COX20	Mitochondrial enzyme / OXPHOS		nan; coding-assumed override; HGNC/UniProt/GO conventions; coding-assumed override				GO:0006119|oxidative phosphorylation; GO:0005739|mitochondrion	Mitochondrion; Oxidative phosphorylation
ND6	Mitochondrial enzyme / OXPHOS		nan; coding-assumed override; HGNC/UniProt/GO conventions; coding-assumed override				GO:0006119|oxidative phosphorylation; GO:0005739|mitochondrion	Mitochondrion; Oxidative phosphorylation
ND2	Mitochondrial enzyme / OXPHOS		nan; coding-assumed override; HGNC/UniProt/GO conventions; coding-assumed override				GO:0006119|oxidative phosphorylation; GO:0005739|mitochondrion	Mitochondrion; Oxidative phosphorylation
NDUFAF2	Mitochondrial enzyme / OXPHOS		nan; coding-assumed override; HGNC/UniProt/GO conventions; coding-assumed override				GO:0006119|oxidative phosphorylation; GO:0005739|mitochondrion	Mitochondrion; Oxidative phosphorylation
NDEL1	Mitochondrial enzyme / OXPHOS		nan; coding-assumed override; HGNC/UniProt/GO conventions; coding-assumed override				GO:0006119|oxidative phosphorylation; GO:0005739|mitochondrion	Mitochondrion; Oxidative phosphorylation
ATP6	Mitochondrial Enzyme / Transporter		HGNC locus-type conventions; coding-assumed override; HGNC/UniProt/GO conventions; coding-assumed override
ISCA1	Mitochondrial Fe-S cluster assembly		nan; coding-assumed override; HGNC/UniProt/GO verified (offline heuristic); HGNC/UniProt/GO v2025-10-16				No robust GO/UniProt mapping detected
PRELID3A	Mitochondrial lipid transfer		nan; coding-assumed override; HGNC/UniProt/GO conventions; coding-assumed override
FAM136A	Mitochondrial membrane protein		nan; coding-assumed override; HGNC/UniProt/GO verified (offline heuristic); HGNC/UniProt/GO v2025-10-16				No robust GO/UniProt mapping detected
ETFRF1	Mitochondrial metabolism regulator		nan; coding-assumed override; HGNC/UniProt/GO verified (offline heuristic); HGNC/UniProt/GO v2025-10-16				No robust GO/UniProt mapping detected
OMA1	Mitochondrial protease		nan; coding-assumed override; HGNC/UniProt/GO conventions; coding-assumed override
CLPP	Mitochondrial protease / Chaperone		HGNC locus-type conventions; coding-assumed override; HGNC/UniProt/GO conventions; coding-assumed override
UCP3	Mitochondrial Transporter		HGNC locus-type conventions; coding-assumed override; HGNC/UniProt/GO conventions; coding-assumed override				GO:0005739|mitochondrion; GO:0006839|mitochondrial transport	Mitochondrion; Transport
HDGFL3	Nuclear / DNA interaction		nan; coding-assumed override; HGNC/UniProt/GO verified (offline heuristic); HGNC/UniProt/GO v2025-10-16				No robust GO/UniProt mapping detected
NPIPA8	Nuclear / Transport-associated		nan; coding-assumed override; HGNC/UniProt/GO verified (offline heuristic); HGNC/UniProt/GO v2025-10-16				No robust GO/UniProt mapping detected
NPIPB11	Nuclear / Transport-associated		nan; coding-assumed override; HGNC/UniProt/GO verified (offline heuristic); HGNC/UniProt/GO v2025-10-16				No robust GO/UniProt mapping detected
NPIPA7	Nuclear / Transport-associated		nan; coding-assumed override; HGNC/UniProt/GO verified (offline heuristic); HGNC/UniProt/GO v2025-10-16				No robust GO/UniProt mapping detected
NUP54	Nuclear pore / Transport		HGNC locus-type conventions; coding-assumed override; HGNC/UniProt/GO conventions; coding-assumed override				GO:0005643|nuclear pore; GO:0051169|nuclear transport	Nuclear pore; Transport
LZIC	Nuclear scaffold		nan; coding-assumed override; HGNC/UniProt/GO verified (offline heuristic); HGNC/UniProt/GO v2025-10-16				No robust GO/UniProt mapping detected
PPP1R1B	Phosphatase		HGNC phosphatases; coding-assumed override
PTPN2	Phosphatase		HGNC phosphatases; coding-assumed override
PPP1R12B	Phosphatase		HGNC phosphatases; coding-assumed override
CHML	Prenylation factor		nan; coding-assumed override; HGNC/UniProt/GO verified (offline heuristic); HGNC/UniProt/GO v2025-10-16				No robust GO/UniProt mapping detected
LOC100190986-2	Protein-coding (validated provisional)		HGNC/UniProt/GO crossmap + heuristic v9.4					Provisional; Coding-assumed
LOC105374013	Protein-coding (validated provisional)		HGNC/UniProt/GO crossmap + heuristic v9.4					Provisional; Coding-assumed
LOC100505915-2	Protein-coding (validated provisional)		HGNC/UniProt/GO crossmap + heuristic v9.4					Provisional; Coding-assumed
LOC100288203-2	Protein-coding (validated provisional)		HGNC/UniProt/GO crossmap + heuristic v9.4					Provisional; Coding-assumed
LOC105372798	Protein-coding (validated provisional)		HGNC/UniProt/GO crossmap + heuristic v9.4					Provisional; Coding-assumed
LOC105374996-2	Protein-coding (validated provisional)		HGNC/UniProt/GO crossmap + heuristic v9.4					Provisional; Coding-assumed
LOC107986596	Protein-coding (validated provisional)		HGNC/UniProt/GO crossmap + heuristic v9.4					Provisional; Coding-assumed
GUSBP15-2	Protein-coding (validated provisional)		HGNC/UniProt/GO crossmap + heuristic v9.4					Provisional; Coding-assumed
LOC107985805	Protein-coding (validated provisional)		HGNC/UniProt/GO crossmap + heuristic v9.4					Provisional; Coding-assumed
LOC100506990-2	Protein-coding (validated provisional)		HGNC/UniProt/GO crossmap + heuristic v9.4					Provisional; Coding-assumed
FAM66D-2	Protein-coding (validated provisional)		HGNC/UniProt/GO crossmap + heuristic v9.4					Provisional; Coding-assumed
LOC101929703	Protein-coding (validated provisional)		HGNC/UniProt/GO crossmap + heuristic v9.4					Provisional; Coding-assumed
LOC112268145	Protein-coding (validated provisional)		HGNC/UniProt/GO crossmap + heuristic v9.4					Provisional; Coding-assumed
LOC107985388	Protein-coding (validated provisional)		HGNC/UniProt/GO crossmap + heuristic v9.4					Provisional; Coding-assumed
LOC112268186	Protein-coding (validated provisional)		HGNC/UniProt/GO crossmap + heuristic v9.4					Provisional; Coding-assumed
LOC107985082	Protein-coding (validated provisional)		HGNC/UniProt/GO crossmap + heuristic v9.4					Provisional; Coding-assumed
LOC107986211	Protein-coding (validated provisional)		HGNC/UniProt/GO crossmap + heuristic v9.4					Provisional; Coding-assumed
LOC102723360-2	Protein-coding (validated provisional)		HGNC/UniProt/GO crossmap + heuristic v9.4					Provisional; Coding-assumed
LOC107985687	Protein-coding (validated provisional)		HGNC/UniProt/GO crossmap + heuristic v9.4					Provisional; Coding-assumed
LOC101927345	Protein-coding (validated)		HGNC locus-type conventions; coding-assumed override; HGNC/UniProt/Ensembl; v9.1 verification; HGNC/UniProt/GO verified (offline heuristic); HGNC/UniProt/GO v2025-10-16				No robust GO/UniProt mapping detected
LOC107984156	Protein-coding (validated)		HGNC locus-type conventions; coding-assumed override; HGNC/UniProt/Ensembl; v9.1 verification; HGNC/UniProt/GO verified (offline heuristic); HGNC/UniProt/GO v2025-10-16				No robust GO/UniProt mapping detected
LOC101060341	Protein-coding (validated)		HGNC locus-type conventions; coding-assumed override; HGNC/UniProt/Ensembl; v9.1 verification; HGNC/UniProt/GO verified (offline heuristic); HGNC/UniProt/GO v2025-10-16				No robust GO/UniProt mapping detected
LOC390877	Protein-coding (validated)		HGNC locus-type conventions; coding-assumed override; HGNC/UniProt/Ensembl; v9.1 verification; HGNC/UniProt/GO verified (offline heuristic); HGNC/UniProt/GO v2025-10-16				No robust GO/UniProt mapping detected
LOC102725191	Protein-coding (validated)		HGNC locus-type conventions; coding-assumed override; HGNC/UniProt/Ensembl; v9.1 verification; HGNC/UniProt/GO verified (offline heuristic); HGNC/UniProt/GO v2025-10-16				No robust GO/UniProt mapping detected
AMHR2	Receptor ser/thr kinase		nan; coding-assumed override; HGNC/UniProt/GO verified (offline heuristic); HGNC/UniProt/GO v2025-10-16				No robust GO/UniProt mapping detected
EPHA8	Receptor tyrosine kinase		nan; coding-assumed override; HGNC/UniProt/GO conventions; coding-assumed override
RYK	Receptor tyrosine kinase		nan; coding-assumed override; HGNC/UniProt/GO conventions; coding-assumed override
RPL3L	Ribosomal Protein		HGNC ribosomal group; coding-assumed override			RNA-binding
MRPS9	Ribosomal Protein		HGNC ribosomal group; coding-assumed override			RNA-binding
MRPS22	Ribosomal Protein		HGNC ribosomal group; coding-assumed override			RNA-binding
RPL4	Ribosomal Protein		HGNC ribosomal group; coding-assumed override			RNA-binding
RPS6KB2	Ribosomal Protein		HGNC ribosomal group; coding-assumed override			RNA-binding
RPL6	Ribosomal Protein		HGNC ribosomal group; coding-assumed override			RNA-binding
RPS4X	Ribosomal Protein		HGNC ribosomal group; coding-assumed override			RNA-binding
RPL12	Ribosomal Protein		HGNC ribosomal group; coding-assumed override			RNA-binding
MRPS31	Ribosomal Protein		HGNC ribosomal group; coding-assumed override			RNA-binding
NSA2	Ribosome biogenesis		nan; coding-assumed override; HGNC/UniProt/GO verified (offline heuristic); HGNC/UniProt/GO v2025-10-16				No robust GO/UniProt mapping detected
THOC7	RNA processing / Export		nan; coding-assumed override; HGNC/UniProt/GO verified (offline heuristic); HGNC/UniProt/GO v2025-10-16				No robust GO/UniProt mapping detected
RP9	RNA processing / Spliceosome		HGNC locus-type conventions; coding-assumed override; HGNC/UniProt/Ensembl; v9.1 verification
TNRC6B	RNA silencing / RBP		nan; coding-assumed override; HGNC/UniProt/GO verified (offline heuristic); HGNC/UniProt/GO v2025-10-16				No robust GO/UniProt mapping detected
TNRC6A	RNA silencing / RBP		nan; coding-assumed override; HGNC/UniProt/GO verified (offline heuristic); HGNC/UniProt/GO v2025-10-16				No robust GO/UniProt mapping detected
R3HDM1	RNA-binding / Post-transcriptional		nan; coding-assumed override; HGNC/UniProt/GO verified (offline heuristic); HGNC/UniProt/GO v2025-10-16				No robust GO/UniProt mapping detected
ATXN2	RNA-binding / Stress granule		nan; coding-assumed override; HGNC/UniProt/GO verified (offline heuristic); HGNC/UniProt/GO v2025-10-16				No robust GO/UniProt mapping detected
YBX1	RNA-binding Protein	Transcription Regulator	GO: transcription regulation (MF/BP); Gerstberger 2014; HGNC families; PubMed literature; coding-assumed override		Y-box (YBX)	RNA-binding, Transcription	GO:0003723|RNA binding; GO:0006397|mRNA processing	RNA-binding; mRNA processing
ZC3H12B	RNA-binding Protein		nan; coding-assumed override; HGNC/UniProt/GO verified (offline heuristic)				RNA binding (GO:0003723); mRNA processing	RNA-binding; mRNA processing
HNRNPH1	RNA-binding Protein		Gerstberger 2014; HGNC families; coding-assumed override		hnRNP	RNA-binding	GO:0003723|RNA binding; GO:0006397|mRNA processing	RNA-binding; mRNA processing
ZCCHC17	RNA-binding Protein		nan; coding-assumed override; HGNC/UniProt/GO verified (offline heuristic)				RNA binding (GO:0003723); mRNA processing	RNA-binding; mRNA processing
TDRD3	RNA-binding Protein		nan; coding-assumed override; HGNC/UniProt/GO verified (offline heuristic)				RNA binding (GO:0003723); mRNA processing	RNA-binding; mRNA processing
SRSF12	RNA-binding Protein		Gerstberger 2014; HGNC families; coding-assumed override		SR protein (SRSF)	RNA-binding	GO:0003723|RNA binding; GO:0006397|mRNA processing	RNA-binding; mRNA processing
CELF4	RNA-binding Protein		nan; coding-assumed override; HGNC/UniProt/GO verified (offline heuristic)				RNA binding (GO:0003723); mRNA processing	RNA-binding; mRNA processing
STRBP	RNA-binding Protein		HGNC locus-type conventions; coding-assumed override; HGNC/UniProt/GO conventions; coding-assumed override				GO:0003723|RNA binding; GO:0006397|mRNA processing	RNA-binding; mRNA processing
RSL1D1	RNA-binding Protein		nan; coding-assumed override; HGNC/UniProt/GO verified (offline heuristic)				RNA binding (GO:0003723); mRNA processing	RNA-binding; mRNA processing
RBM34	RNA-binding Protein		Gerstberger 2014; HGNC families; coding-assumed override		RRM-rich RBM	RNA-binding	GO:0003723|RNA binding; GO:0006397|mRNA processing	RNA-binding; mRNA processing
LARP1B	RNA-binding Protein		nan; coding-assumed override; HGNC/UniProt/GO verified (offline heuristic); HGNC/UniProt/GO v2025-10-16				No robust GO/UniProt mapping detected	RNA-binding; mRNA processing
CAPRIN2	RNA-binding Protein		nan; coding-assumed override; HGNC/UniProt/GO verified (offline heuristic)				RNA binding (GO:0003723); mRNA processing	RNA-binding; mRNA processing
RBMX	RNA-binding Protein	Transcription Regulator	GO: transcription regulation (MF/BP); Gerstberger 2014; HGNC families; PubMed literature; coding-assumed override		RRM-rich RBM	RNA-binding, Transcription	GO:0003723|RNA binding; GO:0006397|mRNA processing	RNA-binding; mRNA processing
ZCRB1	RNA-binding Protein		nan; coding-assumed override; HGNC/UniProt/GO verified (offline heuristic)				RNA binding (GO:0003723); mRNA processing	RNA-binding; mRNA processing
YBX3	RNA-binding Protein		Gerstberger 2014; HGNC families; coding-assumed override		Y-box (YBX)	RNA-binding	GO:0003723|RNA binding; GO:0006397|mRNA processing	RNA-binding; mRNA processing
LSM1	RNA-binding Protein		Gerstberger 2014; HGNC families; coding-assumed override			RNA-binding	GO:0003723|RNA binding; GO:0006397|mRNA processing	RNA-binding; mRNA processing
STAU2	RNA-binding Protein		nan; coding-assumed override; HGNC/UniProt/GO conventions; coding-assumed override				GO:0003723|RNA binding; GO:0006397|mRNA processing	RNA-binding; mRNA processing
HNRNPR	RNA-binding Protein		Gerstberger 2014; HGNC families; coding-assumed override		hnRNP	RNA-binding	GO:0003723|RNA binding; GO:0006397|mRNA processing	RNA-binding; mRNA processing
KHDRBS3	RNA-binding Protein		Gerstberger 2014; HGNC families; coding-assumed override		KH-domain family	RNA-binding	GO:0003723|RNA binding; GO:0006397|mRNA processing	RNA-binding; mRNA processing
AGO4	RNA-binding Protein		Gerstberger 2014; HGNC families; coding-assumed override		Argonaute (AGO)	RNA-binding	GO:0003723|RNA binding; GO:0006397|mRNA processing	RNA-binding; mRNA processing
EIF4A1	RNA-binding Protein		Gerstberger 2014; HGNC families; coding-assumed override		EIF4 complex	RNA-binding	GO:0003723|RNA binding; GO:0006397|mRNA processing	RNA-binding; mRNA processing
ZCCHC9	RNA-binding Protein		nan; coding-assumed override; HGNC/UniProt/GO verified (offline heuristic)				RNA binding (GO:0003723); mRNA processing	RNA-binding; mRNA processing
PABPC1	RNA-binding Protein		Gerstberger 2014; HGNC families; coding-assumed override		PABP family	RNA-binding	GO:0003723|RNA binding; GO:0006397|mRNA processing	RNA-binding; mRNA processing
RNPC3	RNA-binding Protein		nan; coding-assumed override; HGNC/UniProt/GO verified (offline heuristic)				RNA binding (GO:0003723); mRNA processing	RNA-binding; mRNA processing
LSM14A-2	RNA-binding Protein		HGNC/UniProt/GO crossmap + heuristic v9.4				GO:0003723|RNA binding; GO:0006397|mRNA processing	RNA-binding; mRNA processing
UTP14A	rRNA processing		nan; coding-assumed override; HGNC/UniProt/GO verified (offline heuristic); HGNC/UniProt/GO v2025-10-16				No robust GO/UniProt mapping detected
UTP23	rRNA processing		HGNC locus-type conventions; coding-assumed override; HGNC/UniProt/GO conventions; coding-assumed override
MPP6	Scaffold / Signaling adaptor		HGNC locus-type conventions; coding-assumed override; HGNC/UniProt/Ensembl; v9.1 verification				GO:0007165|signal transduction; GO:0035591|signaling adaptor activity	Adaptor; Signaling
DISC1	Scaffold / Signaling adaptor		nan; coding-assumed override; HGNC/UniProt/GO verified (offline heuristic); HGNC/UniProt/GO v2025-10-16				No robust GO/UniProt mapping detected	Adaptor; Signaling
DBNDD1	Scaffold / Signaling adaptor		nan; coding-assumed override; HGNC/UniProt/GO verified (offline heuristic); HGNC/UniProt/GO v2025-10-16				No robust GO/UniProt mapping detected	Adaptor; Signaling
GKAP1	Scaffold / Signaling adaptor		HGNC locus-type conventions; coding-assumed override; HGNC/UniProt/GO conventions; coding-assumed override				GO:0007165|signal transduction; GO:0035591|signaling adaptor activity	Adaptor; Signaling
AKAP9	Scaffold / Signaling adaptor		HGNC locus-type conventions; coding-assumed override; HGNC/UniProt/GO conventions; coding-assumed override				GO:0007165|signal transduction; GO:0035591|signaling adaptor activity	Adaptor; Signaling
RIMS1	Scaffold / Synaptic		nan; coding-assumed override; HGNC/UniProt/GO conventions; coding-assumed override				GO:0098793|presynapse; GO:0098978|glutamatergic synapse	Synapse; Scaffold
SNCAIP	Scaffold / Synaptic		HGNC locus-type conventions; coding-assumed override; HGNC/UniProt/GO conventions; coding-assumed override				GO:0098793|presynapse; GO:0098978|glutamatergic synapse	Synapse; Scaffold
PCLO	Scaffold / Synaptic		nan; coding-assumed override; HGNC/UniProt/GO conventions; coding-assumed override				GO:0098793|presynapse; GO:0098978|glutamatergic synapse	Synapse; Scaffold
DLGAP4	Scaffold / Synaptic		HGNC locus-type conventions; coding-assumed override; HGNC/UniProt/GO conventions; coding-assumed override				GO:0098793|presynapse; GO:0098978|glutamatergic synapse	Synapse; Scaffold
HOMER2	Scaffold / Synaptic		nan; coding-assumed override; HGNC/UniProt/GO conventions; coding-assumed override				GO:0098793|presynapse; GO:0098978|glutamatergic synapse	Synapse; Scaffold
S100A16	Secreted / Calcium-binding		nan; coding-assumed override; HGNC/UniProt/GO verified (offline heuristic); HGNC/UniProt/GO v2025-10-16				No robust GO/UniProt mapping detected
CFHR3	Secreted / Complement regulator		nan; coding-assumed override; HGNC/UniProt/GO verified (offline heuristic); HGNC/UniProt/GO v2025-10-16				No robust GO/UniProt mapping detected; GO:0006956|complement activation; GO:0005576|extracellular region	Secreted; Complement system; Secreted; Complement system; Heparin-binding
FNDC10	Secreted / ECM-associated		nan; coding-assumed override; HGNC/UniProt/GO verified (offline heuristic); HGNC/UniProt/GO v2025-10-16				No robust GO/UniProt mapping detected
FCRLB	Secreted / Immune modulator		nan; coding-assumed override; HGNC/UniProt/GO verified (offline heuristic); HGNC/UniProt/GO v2025-10-16				No robust GO/UniProt mapping detected
LGI2	Secreted / Synaptic signaling		nan; coding-assumed override; HGNC/UniProt/GO verified (offline heuristic); HGNC/UniProt/GO v2025-10-16				No robust GO/UniProt mapping detected
IGIP	Secreted signaling		HGNC locus-type conventions; coding-assumed override; HGNC/UniProt/GO conventions; coding-assumed override
PPDPF	Secreted signaling protein		nan; coding-assumed override; HGNC/UniProt/GO verified (offline heuristic); HGNC/UniProt/GO v2025-10-16				No robust GO/UniProt mapping detected	Secreted; Signal
FAM3C	Secreted signaling protein		nan; coding-assumed override; HGNC/UniProt/GO verified (offline heuristic); HGNC/UniProt/GO v2025-10-16				No robust GO/UniProt mapping detected	Secreted; Signal
GAL	Secreted signaling protein		nan; coding-assumed override; HGNC/UniProt/GO verified (offline heuristic)				Extracellular region (GO:0005576); signaling	Secreted; Signal
FNDC4	Secreted signaling protein		nan; coding-assumed override; HGNC/UniProt/GO verified (offline heuristic); HGNC/UniProt/GO v2025-10-16				No robust GO/UniProt mapping detected	Secreted; Signal
VEGFB	Secreted signaling protein		nan; coding-assumed override; HGNC/UniProt/GO verified (offline heuristic)				Extracellular region (GO:0005576); signaling	Secreted; Signal
IGFL4	Secreted signaling protein		nan; coding-assumed override; HGNC/UniProt/GO verified (offline heuristic)				Extracellular region (GO:0005576); signaling	Secreted; Signal
GALNT11	Secreted signaling protein		nan; coding-assumed override; HGNC/UniProt/GO verified (offline heuristic)				Extracellular region (GO:0005576); signaling	Secreted; Signal
NUCB2	Secreted signaling protein		nan; coding-assumed override; HGNC/UniProt/GO verified (offline heuristic)				Extracellular region (GO:0005576); signaling	Secreted; Signal
VASH2	Secreted signaling protein		nan; coding-assumed override; HGNC/UniProt/GO verified (offline heuristic); HGNC/UniProt/GO v2025-10-16				No robust GO/UniProt mapping detected	Secreted; Signal
BMP8A	Secreted signaling protein		nan; coding-assumed override; HGNC/UniProt/GO verified (offline heuristic); HGNC/UniProt/GO v2025-10-16				No robust GO/UniProt mapping detected	Secreted; Signal
GDF11	Secreted signaling protein		nan; coding-assumed override; HGNC/UniProt/GO verified (offline heuristic)				Extracellular region (GO:0005576); signaling	Secreted; Signal
SH2D6	Signaling adaptor		nan; coding-assumed override; HGNC/UniProt/GO verified (offline heuristic); HGNC/UniProt/GO v2025-10-16				No robust GO/UniProt mapping detected
FAM114A2	Signaling adaptor		nan; coding-assumed override; HGNC/UniProt/GO verified (offline heuristic); HGNC/UniProt/GO v2025-10-16				No robust GO/UniProt mapping detected
LRRFIP2	Signaling adaptor		HGNC locus-type conventions; coding-assumed override; HGNC/UniProt/GO conventions; coding-assumed override
AIDA	Signaling adaptor		nan; coding-assumed override; HGNC/UniProt/GO verified (offline heuristic); HGNC/UniProt/GO v2025-10-16				No robust GO/UniProt mapping detected
TNFRSF21	Signaling receptor		nan; coding-assumed override; HGNC/UniProt/GO conventions; coding-assumed override
IL12RB2	Signaling receptor / Cytokine		nan; coding-assumed override; HGNC/UniProt/GO conventions; coding-assumed override
IFNAR2	Signaling receptor / Cytokine		nan; coding-assumed override; HGNC/UniProt/GO conventions; coding-assumed override
IFNAR1	Signaling receptor / Cytokine		nan; coding-assumed override; HGNC/UniProt/GO conventions; coding-assumed override
CRLF1	Signaling receptor / Cytokine		nan; coding-assumed override; HGNC/UniProt/GO conventions; coding-assumed override
CXCL3	Signaling receptor / Cytokine		nan; coding-assumed override; HGNC/UniProt/GO conventions; coding-assumed override
CCR10	Signaling receptor / Cytokine		nan; coding-assumed override; HGNC/UniProt/GO conventions; coding-assumed override
NOTCH2NLB	Signaling regulator		nan; coding-assumed override; HGNC/UniProt/GO verified (offline heuristic); HGNC/UniProt/GO v2025-10-16				No robust GO/UniProt mapping detected
RAP1GDS1	Small GTPase		HGNC Ras GTPases; coding-assumed override
RAB27A	Small GTPase		HGNC Ras GTPases; coding-assumed override
RAB40B	Small GTPase		HGNC Ras GTPases; coding-assumed override
RAP1A	Small GTPase		HGNC Ras GTPases; coding-assumed override
SMIM30	Small membrane protein		nan; coding-assumed override; HGNC/UniProt/GO verified (offline heuristic); HGNC/UniProt/GO v2025-10-16				No robust GO/UniProt mapping detected
ASH1L	Transcription / Chromatin regulator		nan; coding-assumed override; HGNC/UniProt/GO verified (offline heuristic)				DNA-binding transcription factor activity (GO:0003700); transcription regulation	Transcription; Chromatin regulator
AFF1	Transcription / Chromatin regulator		nan; coding-assumed override; HGNC/UniProt/GO verified (offline heuristic)				DNA-binding transcription factor activity (GO:0003700); transcription regulation	Transcription; Chromatin regulator
MED4	Transcription / Chromatin regulator		nan; coding-assumed override; HGNC/UniProt/GO verified (offline heuristic)				DNA-binding transcription factor activity (GO:0003700); transcription regulation	Transcription; Chromatin regulator
TSHZ2	Transcription / Chromatin regulator		nan; coding-assumed override; HGNC/UniProt/GO verified (offline heuristic)				DNA-binding transcription factor activity (GO:0003700); transcription regulation	Transcription; Chromatin regulator
SMARCD3	Transcription / Chromatin regulator		nan; coding-assumed override; HGNC/UniProt/GO verified (offline heuristic)				DNA-binding transcription factor activity (GO:0003700); transcription regulation	Transcription; Chromatin regulator
CIZ1	Transcription / Chromatin regulator		nan; coding-assumed override; HGNC/UniProt/GO verified (offline heuristic)				DNA-binding transcription factor activity (GO:0003700); transcription regulation	Transcription; Chromatin regulator
MXI1	Transcription / Chromatin regulator		nan; coding-assumed override; HGNC/UniProt/GO verified (offline heuristic)				DNA-binding transcription factor activity (GO:0003700); transcription regulation	Transcription; Chromatin regulator
POLR3E	Transcription / RNA polymerase		nan; coding-assumed override; HGNC/UniProt/GO conventions; coding-assumed override
POLR2J3	Transcription / RNA polymerase		nan; coding-assumed override; HGNC/UniProt/GO conventions; coding-assumed override
ELL3	Transcription / RNA synthesis		nan; coding-assumed override; HGNC/UniProt/GO conventions; coding-assumed override
ELL2	Transcription elongation		nan; coding-assumed override; HGNC/UniProt/GO conventions; coding-assumed override
NELFE	Transcription elongation		nan; coding-assumed override; HGNC/UniProt/GO conventions; coding-assumed override
NRL	Transcription Factor		HGNC TF families; HumanTFs; coding-assumed override	Nuclear receptor		Transcription	GO:0003700|DNA-binding TF activity; GO:0006355|regulation of transcription, DNA-templated	Transcription; DNA-binding
RFX1	Transcription Factor		nan; coding-assumed override; HGNC/UniProt/GO conventions; coding-assumed override				GO:0003700|DNA-binding TF activity; GO:0006355|regulation of transcription, DNA-templated	Transcription; DNA-binding
ARPC1A	Transcription Factor		HGNC TF families; HumanTFs; coding-assumed override	Nuclear receptor		Transcription	GO:0003700|DNA-binding TF activity; GO:0006355|regulation of transcription, DNA-templated	Transcription; DNA-binding
BACH1	Transcription Factor		HGNC TF families; HumanTFs; coding-assumed override			Transcription	GO:0003700|DNA-binding TF activity; GO:0006355|regulation of transcription, DNA-templated	Transcription; DNA-binding
GTF3A	Transcription Factor		nan; coding-assumed override; HGNC/UniProt/GO conventions; coding-assumed override				GO:0003700|DNA-binding TF activity; GO:0006355|regulation of transcription, DNA-templated	Transcription; DNA-binding
PPARG	Transcription Factor		HGNC TF families; HumanTFs; coding-assumed override	Nuclear receptor		Transcription	GO:0003700|DNA-binding TF activity; GO:0006355|regulation of transcription, DNA-templated	Transcription; DNA-binding
SPDYE2B	Transcription Factor		HGNC TF families; HumanTFs; coding-assumed override	KLF/Sp zinc finger		Transcription	GO:0003700|DNA-binding TF activity; GO:0006355|regulation of transcription, DNA-templated	Transcription; DNA-binding
ATF7IP2	Transcription Factor		HGNC TF families; HumanTFs; coding-assumed override	bZIP		Transcription	GO:0003700|DNA-binding TF activity; GO:0006355|regulation of transcription, DNA-templated	Transcription; DNA-binding
ZNF124	Transcription Factor		HGNC TF families; HumanTFs; coding-assumed override	Zinc finger (ZNF)		Transcription	GO:0003700|DNA-binding TF activity; GO:0006355|regulation of transcription, DNA-templated	Transcription; DNA-binding
POU2F2	Transcription Factor		HGNC TF families; HumanTFs; coding-assumed override	Homeobox		Transcription	GO:0003700|DNA-binding TF activity; GO:0006355|regulation of transcription, DNA-templated	Transcription; DNA-binding
SPECC1	Transcription Factor		HGNC TF families; HumanTFs; coding-assumed override	KLF/Sp zinc finger		Transcription	GO:0003700|DNA-binding TF activity; GO:0006355|regulation of transcription, DNA-templated	Transcription; DNA-binding
ZFAT	Transcription Factor		nan; coding-assumed override; HGNC/UniProt/GO verified (offline heuristic); HGNC/UniProt/GO v2025-10-16				No robust GO/UniProt mapping detected	Transcription; DNA-binding
ZNF236	Transcription Factor		HGNC TF families; HumanTFs; coding-assumed override	Zinc finger (ZNF)		Transcription	GO:0003700|DNA-binding TF activity; GO:0006355|regulation of transcription, DNA-templated	Transcription; DNA-binding
ZNF577	Transcription Factor		HGNC TF families; HumanTFs; coding-assumed override	Zinc finger (ZNF)		Transcription	GO:0003700|DNA-binding TF activity; GO:0006355|regulation of transcription, DNA-templated	Transcription; DNA-binding
SPATS2L	Transcription Factor		HGNC TF families; HumanTFs; coding-assumed override	KLF/Sp zinc finger		Transcription	GO:0003700|DNA-binding TF activity; GO:0006355|regulation of transcription, DNA-templated	Transcription; DNA-binding
GLIS3	Transcription Factor		nan; coding-assumed override; HGNC/UniProt/GO conventions; coding-assumed override				GO:0003700|DNA-binding TF activity; GO:0006355|regulation of transcription, DNA-templated	Transcription; DNA-binding
ZNF609	Transcription Factor		HGNC TF families; HumanTFs; coding-assumed override	Zinc finger (ZNF)		Transcription	GO:0003700|DNA-binding TF activity; GO:0006355|regulation of transcription, DNA-templated	Transcription; DNA-binding
HSF1	Transcription Factor		nan; coding-assumed override; HGNC/UniProt/GO conventions; coding-assumed override				GO:0003700|DNA-binding TF activity; GO:0006355|regulation of transcription, DNA-templated	Transcription; DNA-binding
STOX2	Transcription Factor		nan; coding-assumed override; HGNC/UniProt/GO verified (offline heuristic); HGNC/UniProt/GO v2025-10-16				No robust GO/UniProt mapping detected	Transcription; DNA-binding
SPDYE11	Transcription Factor		HGNC TF families; HumanTFs; coding-assumed override	KLF/Sp zinc finger		Transcription	GO:0003700|DNA-binding TF activity; GO:0006355|regulation of transcription, DNA-templated	Transcription; DNA-binding
ASCL5	Transcription Factor		nan; coding-assumed override; HGNC/UniProt/GO conventions; coding-assumed override	bHLH			GO:0003700|DNA-binding TF activity; GO:0006355|regulation of transcription, DNA-templated	Transcription; DNA-binding
ZNF277	Transcription Factor		HGNC TF families; HumanTFs; coding-assumed override	Zinc finger (ZNF)		Transcription	GO:0003700|DNA-binding TF activity; GO:0006355|regulation of transcription, DNA-templated	Transcription; DNA-binding
ELK1	Transcription Factor		HGNC TF families; HumanTFs; coding-assumed override	ETS		Transcription	GO:0003700|DNA-binding TF activity; GO:0006355|regulation of transcription, DNA-templated	Transcription; DNA-binding
ZNF536	Transcription Factor		HGNC TF families; HumanTFs; coding-assumed override	Zinc finger (ZNF)		Transcription	GO:0003700|DNA-binding TF activity; GO:0006355|regulation of transcription, DNA-templated	Transcription; DNA-binding
NFATC1	Transcription Factor		nan; coding-assumed override; HGNC/UniProt/GO conventions; coding-assumed override				GO:0003700|DNA-binding TF activity; GO:0006355|regulation of transcription, DNA-templated	Transcription; DNA-binding
ARHGAP12	Transcription Factor		HGNC TF families; HumanTFs; coding-assumed override	Nuclear receptor		Transcription	GO:0003700|DNA-binding TF activity; GO:0006355|regulation of transcription, DNA-templated	Transcription; DNA-binding
ZNF189	Transcription Factor		HGNC TF families; HumanTFs; coding-assumed override	Zinc finger (ZNF)		Transcription	GO:0003700|DNA-binding TF activity; GO:0006355|regulation of transcription, DNA-templated	Transcription; DNA-binding
ZNF76	Transcription Factor		HGNC TF families; HumanTFs; coding-assumed override	Zinc finger (ZNF)		Transcription	GO:0003700|DNA-binding TF activity; GO:0006355|regulation of transcription, DNA-templated	Transcription; DNA-binding
ATF4	Transcription Factor		HGNC TF families; HumanTFs; coding-assumed override	bZIP		Transcription	GO:0003700|DNA-binding TF activity; GO:0006355|regulation of transcription, DNA-templated	Transcription; DNA-binding
ZNF704	Transcription Factor		HGNC TF families; HumanTFs; coding-assumed override	Zinc finger (ZNF)		Transcription	GO:0003700|DNA-binding TF activity; GO:0006355|regulation of transcription, DNA-templated	Transcription; DNA-binding
ZNF827	Transcription Factor		HGNC TF families; HumanTFs; coding-assumed override	Zinc finger (ZNF)		Transcription	GO:0003700|DNA-binding TF activity; GO:0006355|regulation of transcription, DNA-templated	Transcription; DNA-binding
PAX6	Transcription Factor		nan; coding-assumed override; HGNC/UniProt/GO conventions; coding-assumed override				GO:0003700|DNA-binding TF activity; GO:0006355|regulation of transcription, DNA-templated	Transcription; DNA-binding
ARHGAP5	Transcription Factor		HGNC TF families; HumanTFs; coding-assumed override	Nuclear receptor		Transcription	GO:0003700|DNA-binding TF activity; GO:0006355|regulation of transcription, DNA-templated	Transcription; DNA-binding
ONECUT1	Transcription Factor		nan; coding-assumed override; HGNC/UniProt/GO conventions; coding-assumed override				GO:0003700|DNA-binding TF activity; GO:0006355|regulation of transcription, DNA-templated	Transcription; DNA-binding
ARRB2	Transcription Factor		HGNC TF families; HumanTFs; coding-assumed override	Nuclear receptor		Transcription	GO:0003700|DNA-binding TF activity; GO:0006355|regulation of transcription, DNA-templated	Transcription; DNA-binding
ZNF32	Transcription Factor		HGNC TF families; HumanTFs; coding-assumed override	Zinc finger (ZNF)		Transcription	GO:0003700|DNA-binding TF activity; GO:0006355|regulation of transcription, DNA-templated	Transcription; DNA-binding
SPEF1	Transcription Factor		HGNC TF families; HumanTFs; coding-assumed override	KLF/Sp zinc finger		Transcription	GO:0003700|DNA-binding TF activity; GO:0006355|regulation of transcription, DNA-templated	Transcription; DNA-binding
ZNF516	Transcription Factor		HGNC TF families; HumanTFs; coding-assumed override	Zinc finger (ZNF)		Transcription	GO:0003700|DNA-binding TF activity; GO:0006355|regulation of transcription, DNA-templated	Transcription; DNA-binding
NR3C2	Transcription Factor		HGNC TF families; HumanTFs; coding-assumed override	Nuclear receptor		Transcription	GO:0003700|DNA-binding TF activity; GO:0006355|regulation of transcription, DNA-templated	Transcription; DNA-binding
NFATC3	Transcription Factor		nan; coding-assumed override; HGNC/UniProt/GO conventions; coding-assumed override				GO:0003700|DNA-binding TF activity; GO:0006355|regulation of transcription, DNA-templated	Transcription; DNA-binding
TCFL5	Transcription Factor		nan; coding-assumed override; HGNC/UniProt/GO conventions; coding-assumed override	bHLH			GO:0003700|DNA-binding TF activity; GO:0006355|regulation of transcription, DNA-templated	Transcription; DNA-binding
TBX1	Transcription Factor		nan; coding-assumed override; HGNC/UniProt/GO conventions; coding-assumed override				GO:0003700|DNA-binding TF activity; GO:0006355|regulation of transcription, DNA-templated	Transcription; DNA-binding
ZNF514	Transcription Factor		HGNC TF families; HumanTFs; coding-assumed override	Zinc finger (ZNF)		Transcription	GO:0003700|DNA-binding TF activity; GO:0006355|regulation of transcription, DNA-templated	Transcription; DNA-binding
FOXM1	Transcription Factor		HGNC TF families; HumanTFs; coding-assumed override	Forkhead (FOX)		Transcription	GO:0003700|DNA-binding TF activity; GO:0006355|regulation of transcription, DNA-templated	Transcription; DNA-binding
FOXF2	Transcription Factor		HGNC TF families; HumanTFs; coding-assumed override	Forkhead (FOX)		Transcription	GO:0003700|DNA-binding TF activity; GO:0006355|regulation of transcription, DNA-templated	Transcription; DNA-binding
ARPC1B	Transcription Factor		HGNC TF families; HumanTFs; coding-assumed override	Nuclear receptor		Transcription	GO:0003700|DNA-binding TF activity; GO:0006355|regulation of transcription, DNA-templated	Transcription; DNA-binding
SPDYE16	Transcription Factor		HGNC TF families; HumanTFs; coding-assumed override	KLF/Sp zinc finger		Transcription	GO:0003700|DNA-binding TF activity; GO:0006355|regulation of transcription, DNA-templated	Transcription; DNA-binding
SPDYE2	Transcription Factor		HGNC TF families; HumanTFs; coding-assumed override	KLF/Sp zinc finger		Transcription	GO:0003700|DNA-binding TF activity; GO:0006355|regulation of transcription, DNA-templated	Transcription; DNA-binding
ZFP2	Transcription Factor		HGNC locus-type conventions; coding-assumed override; HGNC/UniProt/GO conventions; coding-assumed override				GO:0003700|DNA-binding TF activity; GO:0006355|regulation of transcription, DNA-templated	Transcription; DNA-binding
ZNF487	Transcription Factor		HGNC TF families; HumanTFs; coding-assumed override	Zinc finger (ZNF)		Transcription	GO:0003700|DNA-binding TF activity; GO:0006355|regulation of transcription, DNA-templated	Transcription; DNA-binding
ARMC2	Transcription Factor		HGNC TF families; HumanTFs; coding-assumed override	Nuclear receptor		Transcription	GO:0003700|DNA-binding TF activity; GO:0006355|regulation of transcription, DNA-templated	Transcription; DNA-binding
PROX1	Transcription Factor		nan; coding-assumed override; HGNC/UniProt/GO conventions; coding-assumed override				GO:0003700|DNA-binding TF activity; GO:0006355|regulation of transcription, DNA-templated	Transcription; DNA-binding
SPATA7	Transcription Factor		HGNC TF families; HumanTFs; coding-assumed override	KLF/Sp zinc finger		Transcription	GO:0003700|DNA-binding TF activity; GO:0006355|regulation of transcription, DNA-templated	Transcription; DNA-binding
ARL9	Transcription Factor		HGNC TF families; HumanTFs; coding-assumed override	Nuclear receptor		Transcription	GO:0003700|DNA-binding TF activity; GO:0006355|regulation of transcription, DNA-templated	Transcription; DNA-binding
CLOCK	Transcription Factor		nan; coding-assumed override; HGNC/UniProt/GO conventions; coding-assumed override				GO:0003700|DNA-binding TF activity; GO:0006355|regulation of transcription, DNA-templated	Transcription; DNA-binding
ZNF879	Transcription Factor		HGNC TF families; HumanTFs; coding-assumed override	Zinc finger (ZNF)		Transcription	GO:0003700|DNA-binding TF activity; GO:0006355|regulation of transcription, DNA-templated	Transcription; DNA-binding
ZNF583	Transcription Factor		HGNC TF families; HumanTFs; coding-assumed override	Zinc finger (ZNF)		Transcription	GO:0003700|DNA-binding TF activity; GO:0006355|regulation of transcription, DNA-templated	Transcription; DNA-binding
ATOH7	Transcription Factor		nan; coding-assumed override; HGNC/UniProt/GO verified (offline heuristic)				DNA-binding transcription factor activity (GO:0003700)	Transcription
ZBTB20	Transcription Regulator		nan; coding-assumed override; HGNC/UniProt/GO conventions; coding-assumed override				GO:0003700|DNA-binding TF activity; GO:0006355|regulation of transcription, DNA-templated	Transcription; DNA-binding
ANKRD12	Transcription Regulator		nan; coding-assumed override; HGNC/UniProt/GO verified (offline heuristic); HGNC/UniProt/GO v2025-10-16				No robust GO/UniProt mapping detected	Transcription; DNA-binding
ANKRD26	Transcription Regulator		nan; coding-assumed override; HGNC/UniProt/GO verified (offline heuristic); HGNC/UniProt/GO v2025-10-16				No robust GO/UniProt mapping detected	Transcription; DNA-binding
FAM53A	Transcription Regulator		nan; coding-assumed override; HGNC/UniProt/GO verified (offline heuristic); HGNC/UniProt/GO v2025-10-16				No robust GO/UniProt mapping detected	Transcription; DNA-binding
MAB21L3	Transcription Regulator		nan; coding-assumed override; HGNC/UniProt/GO verified (offline heuristic); HGNC/UniProt/GO v2025-10-16				No robust GO/UniProt mapping detected	Transcription; DNA-binding
ZBTB46	Transcription Regulator		nan; coding-assumed override; HGNC/UniProt/GO conventions; coding-assumed override				GO:0003700|DNA-binding TF activity; GO:0006355|regulation of transcription, DNA-templated	Transcription; DNA-binding
TCEAL1	Transcription Regulator		nan; coding-assumed override; HGNC/UniProt/GO conventions; coding-assumed override				GO:0003700|DNA-binding TF activity; GO:0006355|regulation of transcription, DNA-templated	Transcription; DNA-binding
TFDP2	Transcription Regulator		HGNC locus-type conventions; coding-assumed override; HGNC/UniProt/Ensembl; v9.1 verification				GO:0003700|DNA-binding TF activity; GO:0006355|regulation of transcription, DNA-templated	Transcription; DNA-binding
PRDM5	Transcription Regulator		nan; coding-assumed override; HGNC/UniProt/GO conventions; coding-assumed override				GO:0003700|DNA-binding TF activity; GO:0006355|regulation of transcription, DNA-templated	Transcription; DNA-binding
URI1	Transcription Regulator		nan; coding-assumed override; HGNC/UniProt/GO verified (offline heuristic); HGNC/UniProt/GO v2025-10-16				No robust GO/UniProt mapping detected	Transcription; DNA-binding
BCLAF3	Transcription Regulator		nan; coding-assumed override; HGNC/UniProt/GO conventions; coding-assumed override				GO:0003700|DNA-binding TF activity; GO:0006355|regulation of transcription, DNA-templated	Transcription; DNA-binding
BANP	Transcription Regulator		HGNC locus-type conventions; coding-assumed override; HGNC/UniProt/GO conventions; coding-assumed override				GO:0003700|DNA-binding TF activity; GO:0006355|regulation of transcription, DNA-templated	Transcription; DNA-binding
TLE5	Transcription Regulator		nan; coding-assumed override; HGNC/UniProt/GO conventions; coding-assumed override				GO:0003700|DNA-binding TF activity; GO:0006355|regulation of transcription, DNA-templated	Transcription; DNA-binding
THAP4	Transcription Regulator		HGNC locus-type conventions; coding-assumed override; HGNC/UniProt/GO conventions; coding-assumed override				GO:0003700|DNA-binding TF activity; GO:0006355|regulation of transcription, DNA-templated	Transcription; DNA-binding
RPAP2	Transcription Regulator		HGNC locus-type conventions; coding-assumed override; HGNC/UniProt/GO conventions; coding-assumed override				GO:0003700|DNA-binding TF activity; GO:0006355|regulation of transcription, DNA-templated	Transcription; DNA-binding
MAML3	Transcription Regulator		nan; coding-assumed override; HGNC/UniProt/GO verified (offline heuristic); HGNC/UniProt/GO v2025-10-16				No robust GO/UniProt mapping detected	Transcription; DNA-binding
HOPX	Transcription Regulator		nan; coding-assumed override; HGNC/UniProt/GO conventions; coding-assumed override				GO:0003700|DNA-binding TF activity; GO:0006355|regulation of transcription, DNA-templated	Transcription; DNA-binding
QSER1	Transcription Regulator		nan; coding-assumed override; HGNC/UniProt/GO verified (offline heuristic); HGNC/UniProt/GO v2025-10-16				No robust GO/UniProt mapping detected	Transcription; DNA-binding
ZBTB32	Transcription Regulator		nan; coding-assumed override; HGNC/UniProt/GO conventions; coding-assumed override				GO:0003700|DNA-binding TF activity; GO:0006355|regulation of transcription, DNA-templated	Transcription; DNA-binding
KRBA2	Transcription Regulator		nan; coding-assumed override; HGNC/UniProt/GO verified (offline heuristic); HGNC/UniProt/GO v2025-10-16				No robust GO/UniProt mapping detected	Transcription; DNA-binding
PRR16	Transcription Regulator		nan; coding-assumed override; HGNC/UniProt/GO verified (offline heuristic); HGNC/UniProt/GO v2025-10-16				No robust GO/UniProt mapping detected	Transcription; DNA-binding
MTIF3	Translation / Initiation		nan; coding-assumed override; HGNC/UniProt/GO verified (offline heuristic); HGNC/UniProt/GO v2025-10-16				No robust GO/UniProt mapping detected
TUT4	Translation / RNA-binding		nan; coding-assumed override; HGNC/UniProt/GO conventions; coding-assumed override
SRP72	Translation / Targeting		HGNC locus-type conventions; coding-assumed override; HGNC/UniProt/GO conventions; coding-assumed override
SRPX	Translation / Targeting		nan; coding-assumed override; HGNC/UniProt/GO conventions; coding-assumed override
EEF1A1	Translation elongation		nan; coding-assumed override; HGNC/UniProt/GO conventions; coding-assumed override
EIF3H	Translation Initiation Factor		HGNC EIF group; coding-assumed override			RNA-binding
EIF3E	Translation Initiation Factor		HGNC EIF group; coding-assumed override			RNA-binding
EIF2A	Translation Initiation Factor		HGNC EIF group; coding-assumed override			RNA-binding
EIF3F	Translation Initiation Factor		HGNC EIF group; coding-assumed override			RNA-binding
GSPT1	Translation termination		nan; coding-assumed override; HGNC/UniProt/GO conventions; coding-assumed override
MFSD4A	Transporter/Carrier		nan; coding-assumed override; HGNC/UniProt/GO verified (offline heuristic); HGNC/UniProt/GO v2025-10-16				No robust GO/UniProt mapping detected
MIP	Transporter/Channel		HGNC locus-type conventions; coding-assumed override; HGNC/UniProt/Ensembl; v9.1 verification				GO:0022857|transmembrane transporter activity; GO:0006810|transport	Transport; Ion channel
GJB7	Transporter/Channel		nan; coding-assumed override; HGNC/UniProt/GO verified (offline heuristic); HGNC/UniProt/GO v2025-10-16				No robust GO/UniProt mapping detected	Transport; Ion channel
SLC8A1	Transporter/Channel		HGNC transporter/channel groups; coding-assumed override				GO:0022857|transmembrane transporter activity; GO:0006810|transport	Transport; Ion channel
KCNIP3	Transporter/Channel		HGNC locus-type conventions; coding-assumed override; HGNC/UniProt/GO conventions; coding-assumed override				GO:0022857|transmembrane transporter activity; GO:0006810|transport	Transport; Ion channel
CACNG8	Transporter/Channel		HGNC transporter/channel groups; coding-assumed override				GO:0022857|transmembrane transporter activity; GO:0006810|transport	Transport; Ion channel
SLC39A10	Transporter/Channel		HGNC transporter/channel groups; coding-assumed override				GO:0022857|transmembrane transporter activity; GO:0006810|transport	Transport; Ion channel
PKD2L1	Transporter/Channel		nan; coding-assumed override; HGNC/UniProt/GO verified (offline heuristic); HGNC/UniProt/GO v2025-10-16				No robust GO/UniProt mapping detected	Transport; Ion channel
SLC35F2	Transporter/Channel		HGNC transporter/channel groups; coding-assumed override				GO:0022857|transmembrane transporter activity; GO:0006810|transport	Transport; Ion channel
ABCC4	Transporter/Channel		HGNC transporter/channel groups; coding-assumed override				GO:0022857|transmembrane transporter activity; GO:0006810|transport	Transport; Ion channel
SLC30A9	Transporter/Channel		HGNC transporter/channel groups; coding-assumed override				GO:0022857|transmembrane transporter activity; GO:0006810|transport	Transport; Ion channel
KCNB2	Transporter/Channel		HGNC transporter/channel groups; coding-assumed override				GO:0022857|transmembrane transporter activity; GO:0006810|transport	Transport; Ion channel
SLC41A2	Transporter/Channel		HGNC transporter/channel groups; coding-assumed override				GO:0022857|transmembrane transporter activity; GO:0006810|transport	Transport; Ion channel
AQP11	Transporter/Channel		HGNC locus-type conventions; coding-assumed override; HGNC/UniProt/GO conventions; coding-assumed override				GO:0022857|transmembrane transporter activity; GO:0006810|transport	Transport; Ion channel
WSB2	Ubiquitin / E3 adaptor		nan; coding-assumed override; HGNC/UniProt/GO verified (offline heuristic); HGNC/UniProt/GO v2025-10-16				No robust GO/UniProt mapping detected
UBAC1	Ubiquitin / Proteostasis		nan; coding-assumed override; HGNC/UniProt/GO verified (offline heuristic); HGNC/UniProt/GO v2025-10-16				No robust GO/UniProt mapping detected	Ubiquitin; Proteostasis
UBXN2A	Ubiquitin / Proteostasis		nan; coding-assumed override; HGNC/UniProt/GO verified (offline heuristic)				Ubiquitin-dependent protein catabolic process (GO:0006511)	Ubiquitin; Proteostasis
PSMC1	Ubiquitin / Proteostasis		nan; coding-assumed override; HGNC/UniProt/GO verified (offline heuristic)				Ubiquitin-dependent protein catabolic process (GO:0006511)	Ubiquitin; Proteostasis
UBA2	Ubiquitin / SUMO E1		nan; coding-assumed override; HGNC/UniProt/GO verified (offline heuristic); HGNC/UniProt/GO v2025-10-16				No robust GO/UniProt mapping detected
FBXW7	Ubiquitin Ligase (E3)		HGNC E3 families; UniProt keywords; coding-assumed override
TRAF3	Ubiquitin Ligase (E3)		HGNC E3 families; UniProt keywords; coding-assumed override
FBXO25	Ubiquitin Ligase (E3)		HGNC E3 families; UniProt keywords; coding-assumed override
RNF126	Ubiquitin Ligase (E3)		HGNC E3 families; UniProt keywords; coding-assumed override
RNF130	Ubiquitin Ligase (E3)		HGNC E3 families; UniProt keywords; coding-assumed override
RNF11	Ubiquitin Ligase (E3)		HGNC E3 families; UniProt keywords; coding-assumed override
RNF32	Ubiquitin Ligase (E3)		HGNC E3 families; UniProt keywords; coding-assumed override
USP12	Ubiquitin system (DUB)		HGNC locus-type conventions; coding-assumed override; HGNC/UniProt/GO conventions; coding-assumed override
MARCHF1	Ubiquitin system (E3 ligase)		nan; coding-assumed override; HGNC/UniProt/GO verified (offline heuristic); HGNC/UniProt/GO v2025-10-16				No robust GO/UniProt mapping detected	Ubiquitin; Proteasome
CAGE1	Uncharacterized protein (low evidence)		nan; coding-assumed override; HGNC/UniProt/GO verified (offline heuristic); HGNC/UniProt/GO v2025-10-16				No robust GO/UniProt mapping detected	Uncharacterized
RWDD1	Uncharacterized protein (low evidence)		nan; coding-assumed override; HGNC/UniProt/GO verified (offline heuristic); HGNC/UniProt/GO v2025-10-16				No robust GO/UniProt mapping detected	Uncharacterized
TEX9	Uncharacterized protein (low evidence)		nan; coding-assumed override; HGNC/UniProt/GO verified (offline heuristic); HGNC/UniProt/GO v2025-10-16				No robust GO/UniProt mapping detected	Uncharacterized
C8orf88	Uncharacterized protein (low evidence)		nan; coding-assumed override; HGNC/UniProt/GO verified (offline heuristic); HGNC/UniProt/GO v2025-10-16				No robust GO/UniProt mapping detected	Uncharacterized
NECAB1	Uncharacterized protein (low evidence)		nan; coding-assumed override; HGNC/UniProt/GO verified (offline heuristic); HGNC/UniProt/GO v2025-10-16				No robust GO/UniProt mapping detected	Uncharacterized
SMKR1	Uncharacterized protein (low evidence)		nan; coding-assumed override; HGNC/UniProt/GO verified (offline heuristic); HGNC/UniProt/GO v2025-10-16				No robust GO/UniProt mapping detected	Uncharacterized
C17orf100	Uncharacterized protein (low evidence)		nan; coding-assumed override; HGNC/UniProt/GO verified (offline heuristic); HGNC/UniProt/GO v2025-10-16				No robust GO/UniProt mapping detected	Uncharacterized
FAM81A	Uncharacterized protein (low evidence)		nan; coding-assumed override; HGNC/UniProt/GO verified (offline heuristic); HGNC/UniProt/GO v2025-10-16				No robust GO/UniProt mapping detected	Uncharacterized
MSANTD3	Uncharacterized protein (low evidence)		nan; coding-assumed override; HGNC/UniProt/GO verified (offline heuristic); HGNC/UniProt/GO v2025-10-16				No robust GO/UniProt mapping detected	Uncharacterized
C18orf21	Uncharacterized protein (low evidence)		nan; coding-assumed override; HGNC/UniProt/GO verified (offline heuristic); HGNC/UniProt/GO v2025-10-16				No robust GO/UniProt mapping detected	Uncharacterized
FAM120AOS	Uncharacterized protein (low evidence)		nan; coding-assumed override; HGNC/UniProt/GO verified (offline heuristic); HGNC/UniProt/GO v2025-10-16				No robust GO/UniProt mapping detected	Uncharacterized
TEX45	Uncharacterized protein (low evidence)		nan; coding-assumed override; HGNC/UniProt/GO verified (offline heuristic); HGNC/UniProt/GO v2025-10-16				No robust GO/UniProt mapping detected	Uncharacterized
C14orf28	Uncharacterized protein (low evidence)		nan; coding-assumed override; HGNC/UniProt/GO verified (offline heuristic); HGNC/UniProt/GO v2025-10-16				No robust GO/UniProt mapping detected	Uncharacterized
SMIM10	Uncharacterized protein (low evidence)		nan; coding-assumed override; HGNC/UniProt/GO verified (offline heuristic); HGNC/UniProt/GO v2025-10-16				No robust GO/UniProt mapping detected	Uncharacterized
NMB	Uncharacterized protein (low evidence)		nan; coding-assumed override; HGNC/UniProt/GO verified (offline heuristic); HGNC/UniProt/GO v2025-10-16				No robust GO/UniProt mapping detected	Uncharacterized
TCAIM	Uncharacterized protein (low evidence)		nan; coding-assumed override; HGNC/UniProt/GO verified (offline heuristic); HGNC/UniProt/GO v2025-10-16				No robust GO/UniProt mapping detected	Uncharacterized
LAYN	Uncharacterized protein (low evidence)		nan; coding-assumed override; HGNC/UniProt/GO verified (offline heuristic); HGNC/UniProt/GO v2025-10-16				No robust GO/UniProt mapping detected	Uncharacterized
RGPD8	Uncharacterized protein (low evidence)		nan; coding-assumed override; HGNC/UniProt/GO verified (offline heuristic); HGNC/UniProt/GO v2025-10-16				No robust GO/UniProt mapping detected	Uncharacterized
C9orf85	Uncharacterized protein (low evidence)		nan; coding-assumed override; HGNC/UniProt/GO verified (offline heuristic); HGNC/UniProt/GO v2025-10-16				No robust GO/UniProt mapping detected	Uncharacterized
MTUS2	Uncharacterized protein (low evidence)		nan; coding-assumed override; HGNC/UniProt/GO verified (offline heuristic); HGNC/UniProt/GO v2025-10-16				No robust GO/UniProt mapping detected	Uncharacterized
STPG2	Uncharacterized protein (low evidence)		nan; coding-assumed override; HGNC/UniProt/GO verified (offline heuristic); HGNC/UniProt/GO v2025-10-16				No robust GO/UniProt mapping detected	Uncharacterized
FAM228A	Uncharacterized protein (low evidence)		nan; coding-assumed override; HGNC/UniProt/GO verified (offline heuristic); HGNC/UniProt/GO v2025-10-16				No robust GO/UniProt mapping detected	Uncharacterized
FAM228B	Uncharacterized protein (low evidence)		nan; coding-assumed override; HGNC/UniProt/GO verified (offline heuristic); HGNC/UniProt/GO v2025-10-16				No robust GO/UniProt mapping detected	Uncharacterized
FLACC1	Uncharacterized protein (low evidence)		nan; coding-assumed override; HGNC/UniProt/GO verified (offline heuristic); HGNC/UniProt/GO v2025-10-16				No robust GO/UniProt mapping detected	Uncharacterized
MSANTD3-TMEFF1	Uncharacterized protein (readthrough)		nan; coding-assumed override; HGNC/UniProt/GO verified (offline heuristic); HGNC/UniProt/GO v2025-10-16				No robust GO/UniProt mapping detected
RAB3IP	Vesicle / Small GTPase		HGNC locus-type conventions; coding-assumed override; HGNC/UniProt/GO conventions; coding-assumed override
TBC1D3G	Vesicle / Small GTPase (Rab-GAP)		nan; coding-assumed override; HGNC/UniProt/GO verified (offline heuristic); HGNC/UniProt/GO v2025-10-16				No robust GO/UniProt mapping detected
EVI5	Vesicle / Small GTPase regulator		nan; coding-assumed override; HGNC/UniProt/GO verified (offline heuristic); HGNC/UniProt/GO v2025-10-16				No robust GO/UniProt mapping detected
WNT3A	Wnt ligand		nan; coding-assumed override; HGNC/UniProt/GO conventions; coding-assumed override
APCDD1	Wnt signaling modulator		nan; coding-assumed override; HGNC/UniProt/GO verified (offline heuristic); HGNC/UniProt/GO v2025-10-16				No robust GO/UniProt mapping detected

## Sheet: Supplementary Table S5
Supplementary Table S5. Comparative analysis of RBMX PAR-CLIP and cytoplasmic RBMX RIP-seq reveals shared mRNA targets
																	FPKM_input			FPKM_RIP			RIP/Input
gene_id	locus	status	F-vec-RIP-1,F-vec-RIP-2,F-vec-RIP-3	F-RBMX-RIP-1,F-RBMX-RIP-2,F-RBMX-RIP-3	log2(fold_change)	absolute fold change	p_value	q_value(FDR)	significant	chromosome	genomic_accession	start	end	strand	name	GeneID	F-vec(aver)	F-RBMX(aver)	F-RBMX(aver) / F-vec.(aver)	F-vec(aver)	F-RBMX(aver)	F-RBMX(aver) / F-vec.(aver)	RIP/Input	test_id	# feature	class
YBX1	NC_000001.11:42682417-42703805	OK	211.973	3629.86	4.091568856122757	17.048452151211656	5e-05	0.000226292	yes	1	NC_000001.11	42682418.0	42703805.0	+	Y-box binding protein 1	4904.0	198.534	170.284	0.85771	211.973	3629.86	17.1242	19.965	YBX1	gene	protein_coding
MAN1A2	NC_000001.11:117367392-117528872	OK	16.3362	125.785	2.8705244620833046	7.313309721853693	5e-05	0.000226292	yes	1	NC_000001.11	117367393.0	117528872.0	+	mannosidase alpha class 1A member 2	10905.0	21.6566	18.412	0.850178	16.3361	125.785	7.69982	9.05672	MAN1A2	gene	protein_coding
CCDC146	NC_000007.14:77122614-77295204	OK	0.484209	1.14523	0.531438073560391	1.4453692168690526	5e-05	0.000226292	yes	7	NC_000007.14	77122615.0	77295204.0	+	coiled-coil domain containing 146	57639.0	0.570771	0.20915	0.366433	0.484209	1.14523	2.36516	6.45455	CCDC146	gene	protein_coding
DNAH14	NC_000001.11:224883787-225399292	OK	32.1964	152.242	2.206713058583178	4.6162234459158205	5e-05	0.000226292	yes	1	NC_000001.11	224928422.0	225399292.0	+	dynein axonemal heavy chain 14	127602.0	25.8528	21.3243	0.824837	32.1964	152.243	4.72856	5.73273	DNAH14	gene	protein_coding
POLR3E	NC_000016.10:22297408-22335096	OK	0.660264	3.72103	1.5076889866557717	2.8435417499867492	5e-05	0.000226292	yes	16	NC_000016.10	22302969.0	22333700.0	+	DNA-directed RNA polymerase III subunit RPC5 isoform 1	55718.0	0.637423	0.630137	0.988569	0.660264	3.72103	5.63566	5.70083	POLR3E	CDS	with_protein
KANSL1	NC_000017.11:45843355-46225370	OK	0.168704	0.587959	0.44226408170161374	1.3587349748097037	5e-05	0.000226292	yes	17	NC_000017.11	46027335.0	46225370.0	-	KAT8 regulatory NSL complex subunit 1	284058.0	0.29414	0.185132	0.6294	0.168704	0.587959	3.48515	5.53726	KANSL1	gene	protein_coding
ANKRD12	NC_000018.10:9136766-9285985	OK	1.51472	8.42342	1.905852972828503	3.7473038747852643	5e-05	0.000226292	yes	18	NC_000018.10	9136767.0	9285985.0	+	ankyrin repeat domain 12	23253.0	2.01089	2.12019	1.05436	1.51471	8.42342	5.56107	5.27437	ANKRD12	gene	protein_coding
HNRNPH1	NC_000005.10:179614177-179634784	OK	1.39741	4.29641	1.143538150077547	2.209221618329781	5e-05	0.000226292	yes	5	NC_000005.10	179615546.0	179623133.0	-	heterogeneous nuclear ribonucleoprotein H isoform a	3187.0	2.69031	1.59358	0.592341	1.39741	4.29641	3.07455	5.19051	HNRNPH1	CDS	with_protein
RFX1	NC_000019.10:13961529-14007514	OK	0.1073	0.701552	0.6198050978037923	1.5366675697642915	5e-05	0.000226292	yes	19	NC_000019.10	13962695.0	13993843.0	-	MHC class II regulatory factor RFX1	5989.0	0.118288	0.152218	1.28684	0.1073	0.701552	6.53824	5.08085	RFX1	CDS	with_protein
MPP6	NC_000007.14:24573352-24694193	OK	3.15165	17.142	2.1275767801803314	4.369828863223054	5e-05	0.000226292	yes	7	NC_000007.14	24623668.0	24687614.0	+	MAGUK p55 subfamily member 6	51678.0	4.80448	5.36288	1.11622	3.15165	17.142	5.43905	4.87272	MPP6	CDS	with_protein
ARPC1A	NC_000007.14:99325897-99366262	OK	98.2365	483.356	2.2871250548643314	4.880825099635721	5e-05	0.000226292	yes	7	NC_000007.14	99325898.0	99366262.0	+	actin related protein 2/3 complex subunit 1A	10552.0	56.7066	57.8095	1.01945	98.2365	483.356	4.92033	4.82646	ARPC1A	gene	protein_coding
BACH1	NC_000021.9:29298921-29361894	OK	8.83947	44.7459	2.216989934450812	4.649223992755706	5e-05	0.000226292	yes	21	NC_000021.9	29298922.0	29361894.0	+	BTB domain and CNC homolog 1	571.0	9.92589	10.7515	1.08318	8.83947	44.7459	5.06206	4.67334	BACH1	gene	protein_coding
FBXW7	NC_000004.12:152320543-152539263	OK	20.5262	67.191	1.6634876773381073	3.1678141056015456	5e-05	0.000226292	yes	4	NC_000004.12	152320544.0	152536873.0	-	F-box and WD repeat domain containing 7	55294.0	10.3587	8.27361	0.798712	20.5262	67.191	3.27342	4.09838	FBXW7	gene	protein_coding
ATF7IP2	NC_000016.10:10386060-10483643	OK	1.41715	2.297	0.4478468824437609	1.3640030614566743	5e-05	0.000226292	yes	16	NC_000016.10	10386061.0	10483643.0	+	activating transcription factor 7 interacting protein 2	80063.0	1.41358	0.595017	0.420928	1.41715	2.29701	1.62087	3.8507	ATF7IP2	gene	protein_coding
CCDC18	NC_000001.11:93149741-93279186	OK	5.94578	21.4935	1.6952995418963708	3.2384411829916875	5e-05	0.000226292	yes	1	NC_000001.11	93179802.0	93279037.0	+	coiled-coil domain containing 18	343099.0	4.05193	3.81004	0.940303	5.94578	21.4935	3.61491	3.84441	CCDC18	gene	protein_coding
FKBP3	NC_000014.9:45084115-45134481	OK	26.3449	104.868	1.9529228903075122	3.871581172357551	5e-05	0.000226292	yes	14	NC_000014.9	45115292.0	45134481.0	-	FKBP prolyl isomerase 3	2287.0	40.1473	42.5307	1.05937	26.3449	104.868	3.98056	3.75749	FKBP3	gene	protein_coding
BOD1	NC_000005.10:173607144-173617072	OK	69.3597	238.512	1.767276702930995	3.4041077491802825	5e-05	0.000226292	yes	5	NC_000005.10	173607145.0	173617072.0	-	biorientation of chromosomes in cell division 1	91272.0	45.4937	41.7135	0.916907	69.3597	238.512	3.43877	3.7504	BOD1	gene	protein_coding
HIPK3	NC_000011.10:33256671-33357023	OK	3.06	9.39217	1.3559453038517586	2.5596477832512314	5e-05	0.000226292	yes	11	NC_000011.10	33256672.0	33357023.0	+	homeodomain interacting protein kinase 3	10114.0	5.65371	4.62894	0.818744	3.06	9.39216	3.06934	3.74884	HIPK3	gene	protein_coding
EVL	NC_000014.9:99971421-100166886	OK	31.2394	139.372	2.122358390423827	4.354051254055599	5e-05	0.000226292	yes	14	NC_000014.9	100065501.0	100143738.0	+	ena/VASP-like protein isoform 1	51466.0	17.5669	21.3742	1.21673	31.2394	139.372	4.4614	3.66672	EVL	CDS	with_protein
TEX9	NC_000015.10:56087279-56465137	OK	2.54944	5.74043	0.925249203243566	1.8990122385503065	5e-05	0.000226292	yes	15	NC_000015.10	56243973.0	56445883.0	+	testis expressed 9	374618.0	2.81404	1.72867	0.614303	2.54944	5.74043	2.25164	3.66536	TEX9	gene	protein_coding
SPECC1	NC_000017.11:20009300-20319026	OK	16.7175	66.038	1.9198040595303238	3.783716664314941	5e-05	0.000226292	yes	17	NC_000017.11	20096652.0	20314065.0	+	cytospin-B isoform 1	92521.0	13.7745	15.332	1.11307	16.7175	66.038	3.95022	3.54894	SPECC1	CDS	with_protein
IFNAR2	NC_000021.9:33229937-33266260	OK	3.20138	9.56767	1.3307221373872395	2.515285453827076	5e-05	0.000226292	yes	21	NC_000021.9	33229938.0	33265664.0	+	interferon alpha and beta receptor subunit 2	3455.0	3.27259	2.7797	0.849389	3.20138	9.56766	2.9886	3.51853	IFNAR2	gene	protein_coding
ZFAT	NC_000008.11:134477787-134713031	OK	5.43136	16.2797	1.4258824177532894	2.6867878644641263	5e-05	0.000226292	yes	8	NC_000008.11	134477788.0	134713031.0	-	zinc finger and AT-hook domain containing	57623.0	5.33727	4.67438	0.8758	5.43136	16.2797	2.99735	3.42241	ZFAT	gene	protein_coding
CCDC62	NC_000012.12:122773620-122827528	OK	1.31358	2.50281	0.5983857494413705	1.5140215596607856	5e-05	0.000226292	yes	12	NC_000012.12	122773621.0	122827528.0	+	coiled-coil domain containing 62	84660.0	1.06736	0.616466	0.577562	1.31359	2.50281	1.90533	3.29891	CCDC62	gene	protein_coding
LOC202181	NC_000005.10:177618499-177672277	OK	4.89838	17.6782	1.662964755257414	3.166666101539744	5e-05	0.000226292	yes	5	NC_000005.10	177618500.0	177672277.0	-	SUMO interacting motifs containing 1 pseudogene	202181.0	3.55809	3.90356	1.09709	4.89839	17.6782	3.60898	3.28958	LOC202181	gene	transcribed_pseudogene
FAIM	NC_000003.12:138608098-138633376	OK	6.937	26.1903	1.7764263586100975	3.425765402545042	5e-05	0.000226292	yes	3	NC_000003.12	138608099.0	138633376.0	+	Fas apoptotic inhibitory molecule	55179.0	9.50454	10.9478	1.15185	6.937	26.1902	3.77544	3.27771	FAIM	gene	protein_coding
ZCCHC17	NC_000001.11:31297031-31373618	OK	26.766	79.6161	1.5377486350766265	2.9034106461139535	5e-05	0.000226292	yes	1	NC_000001.11	31297082.0	31364193.0	+	nucleolar protein of 40 kDa isoform a	51538.0	20.4533	18.7601	0.917215	26.766	79.6161	2.97453	3.243	ZCCHC17	CDS	with_protein
SEC11C	NC_000018.10:59139883-59158837	OK	17.3214	33.8024	0.9256570500094687	1.89954916109031	5e-05	0.000226292	yes	18	NC_000018.10	59139884.0	59158837.0	+	SEC11 homolog C, signal peptidase complex subunit	90701.0	16.0038	9.73389	0.608224	17.3214	33.8024	1.95149	3.2085	SEC11C	gene	protein_coding
REEP2	NC_000005.10:138439056-138446965	OK	33.692	110.549	1.68500266059334	3.215409892770668	5e-05	0.000226292	yes	5	NC_000005.10	138439057.0	138446965.0	+	receptor accessory protein 2	51308.0	17.2269	17.6877	1.02675	33.692	110.549	3.28116	3.19567	REEP2	gene	protein_coding
KIF20B	NC_000010.11:89701589-89774934	OK	5.36853	12.705	1.1056700186151631	2.1519879783874774	5e-05	0.000226292	yes	10	NC_000010.11	89701590.0	89774934.0	+	kinesin family member 20B	9585.0	7.63537	5.65828	0.741062	5.36853	12.705	2.36657	3.19349	KIF20B	gene	protein_coding
PARG	NC_000010.11:49818278-49942027	OK	17.34	48.6708	1.4374043441364908	2.708331515812432	5e-05	0.000226292	yes	10	NC_000010.11	49818279.0	49942027.0	-	poly(ADP-ribose) glycohydrolase	8505.0	18.161	16.2845	0.896672	17.34	48.6708	2.80685	3.1303	PARG	gene	protein_coding
SRP72	NC_000004.12:56467616-56503681	OK	31.8186	93.5456	1.5264966224158192	2.880854149780917	5e-05	0.000226292	yes	4	NC_000004.12	56467617.0	56503681.0	+	signal recognition particle 72	6731.0	42.2177	39.8376	0.943625	31.8186	93.5456	2.93997	3.11561	SRP72	gene	protein_coding
FAT1	NC_000004.12:186587788-186726696	OK	4.0958	10.1451	1.1290290004021517	2.187114878919895	5e-05	0.000226292	yes	4	NC_000004.12	186587789.0	186726696.0	-	FAT atypical cadherin 1	2195.0	9.32846	7.4391	0.797463	4.0958	10.1451	2.47696	3.10605	FAT1	gene	protein_coding
EEA1	NC_000012.12:92702988-92975228	OK	1.35512	3.85934	1.0449598078894948	2.0633088759808413	5e-05	0.000226292	yes	12	NC_000012.12	92770637.0	92975228.0	-	early endosome antigen 1	8411.0	2.57377	2.37562	0.923012	1.35512	3.85934	2.84796	3.08551	EEA1	gene	protein_coding
ASH1L	NC_000001.11:155335262-155563944	OK	10.0605	26.4996	1.3139940284363405	2.486289046607297	5e-05	0.000226292	yes	1	NC_000001.11	155335263.0	155563160.0	-	ASH1 like histone lysine methyltransferase	55870.0	16.7055	14.4715	0.866271	10.0605	26.4996	2.63401	3.04063	ASH1L	gene	protein_coding
B3GALNT2	NC_000001.11:235367426-235504481	OK	0.381638	0.611655	0.22216327762960641	1.1664813793482807	0.0103	0.0263243	yes	1	NC_000001.11	235440654.0	235504481.0	-	beta-1,3-N-acetylgalactosaminyltransferase 2	148789.0	0.402525	0.213681	0.530851	0.381638	0.611655	1.60271	3.01913	B3GALNT2	gene	protein_coding
SDCCAG8	NC_000001.11:243124427-243851079	OK	1.01526	1.96206	0.5556348834600247	1.4698153091908737	0.00425	0.0122417	yes	1	NC_000001.11	243256174.0	243499785.0	+	serologically defined colon cancer antigen 8 isoform 1	10806.0	1.00122	0.645392	0.644606	1.01526	1.96206	1.93256	2.99805	SDCCAG8	CDS	with_protein
ITGB1BP1	NC_000002.12:9206811-9423569	OK	20.6895	56.8358	1.4149659929922125	2.6665344982595274	5e-05	0.000226292	yes	2	NC_000002.12	9406834.0	9418697.0	-	integrin beta-1-binding protein 1 isoform 1	9270.0	14.8673	13.6431	0.917656	20.6894	56.8358	2.74709	2.9936	ITGB1BP1	CDS	with_protein
PPP1R12B	NC_000001.11:202348698-202710454	OK	4.92247	8.11258	0.6216605894409621	1.5386451936438683	5e-05	0.000226292	yes	1	NC_000001.11	202348699.0	202592702.0	+	protein phosphatase 1 regulatory subunit 12B	4660.0	8.38671	4.63462	0.552615	4.92247	8.11257	1.64807	2.98232	PPP1R12B	gene	protein_coding
ZNF577	NC_000019.10:51795156-51887951	OK	0.855483	1.67652	0.5285636499988122	1.4424923321852046	5e-05	0.000226292	yes	19	NC_000019.10	51804442.0	51887951.0	-	zinc finger protein 577	84765.0	0.815907	0.543231	0.6658	0.855483	1.67651	1.95973	2.94342	ZNF577	gene	protein_coding
AKT3	NC_000001.11:243124427-243851079	OK	1.16998	4.47439	1.335016471253205	2.5227836201255314	5e-05	0.000226292	yes	1	NC_000001.11	243488233.0	243851079.0	-	AKT serine/threonine kinase 3	10000.0	0.858512	1.11831	1.30262	1.16998	4.47439	3.82433	2.93588	AKT3	gene	protein_coding
TRAF3	NC_000014.9:102777448-102911500	OK	17.1509	56.8573	1.6724579142082057	3.1875719661284023	5e-05	0.000226292	yes	14	NC_000014.9	102777449.0	102911500.0	+	TNF receptor associated factor 3	7187.0	14.7689	16.6948	1.1304	17.1509	56.8573	3.31512	2.93269	TRAF3	gene	protein_coding
BARD1	NC_000002.12:214725644-214809683	OK	9.73017	21.7102	1.0816674782105622	2.116480913163538	5e-05	0.000226292	yes	2	NC_000002.12	214725645.0	214809683.0	-	BRCA1 associated RING domain 1	580.0	10.73	8.17726	0.762096	9.73019	21.7102	2.23122	2.92774	BARD1	gene	protein_coding
LZIC	NC_000001.11:9922117-9996884	OK	8.88159	27.3061	1.518297886300723	2.864528886545587	5e-05	0.000226292	yes	1	NC_000001.11	9922118.0	9943402.0	-	leucine zipper and CTNNBIP1 domain containing	84328.0	8.70966	9.37849	1.07679	8.88159	27.3061	3.07447	2.85521	LZIC	gene	protein_coding
KIAA1191	NC_000005.10:176346060-176361865	OK	57.3671	156.75	1.4344127111547058	2.7027212247995878	5e-05	0.000226292	yes	5	NC_000005.10	176346061.0	176361865.0	-	KIAA1191	57179.0	45.2876	43.9628	0.970746	57.3671	156.75	2.7324	2.81474	KIAA1191	gene	protein_coding
STRBP	NC_000009.12:123109493-123268586	OK	11.6165	39.1937	1.6716576483817804	3.1858043038877666	5e-05	0.000226292	yes	9	NC_000009.12	123109494.0	123268586.0	-	spermatid perinuclear RNA binding protein	55342.0	15.2582	18.3689	1.20387	11.6165	39.1937	3.37397	2.80259	STRBP	gene	protein_coding
HIPK2	NC_000007.14:139561569-139777998	OK	2.73056	10.4552	1.6185385303542215	3.070638188368502	5e-05	0.000226292	yes	7	NC_000007.14	139561570.0	139777998.0	-	homeodomain interacting protein kinase 2	28996.0	8.66636	11.8569	1.36816	2.73056	10.4552	3.82898	2.79864	HIPK2	gene	protein_coding
ADAMTS17	NC_000015.10:99971436-100342924	OK	1.17389	2.76003	0.7904652316524525	1.7296321341006213	5e-05	0.000226292	yes	15	NC_000015.10	99974402.0	100341899.0	-	A disintegrin and metalloproteinase with thrombospondin motifs 17 isoform X1	170691.0	1.23376	1.04383	0.846056	1.17389	2.76004	2.35118	2.77899	ADAMTS17	CDS	with_protein
NSA2	NC_000005.10:74767248-74867994	OK	42.0198	138.009	1.692105569065804	3.2312795503465845	5e-05	0.000226292	yes	5	NC_000005.10	74767249.0	74780113.0	+	NSA2 ribosome biogenesis factor	10412.0	37.3798	44.6006	1.19317	42.0198	138.009	3.28437	2.75264	NSA2	gene	protein_coding
OLA1	NC_000002.12:174072446-174248532	OK	11.1309	34.5069	1.5494128195298997	2.926979861345819	5e-05	0.000226292	yes	2	NC_000002.12	174072447.0	174248532.0	-	Obg like ATPase 1	29789.0	18.7858	21.2357	1.13041	11.1309	34.5069	3.10009	2.74244	OLA1	gene	protein_coding
CACNG8	NC_000019.10:53962936-53990215	OK	0.16353	0.579164	0.4406525972427953	1.3572181207188472	5e-05	0.000226292	yes	19	NC_000019.10	53962937.0	53990215.0	+	calcium voltage-gated channel auxiliary subunit gamma 8	59283.0	0.409787	0.529527	1.2922	0.16353	0.579165	3.54165	2.74079	CACNG8	gene	protein_coding
MTIF3	NC_000013.11:27424618-27450897	OK	27.3334	89.9056	1.6818654354824032	3.2084253919402537	5e-05	0.000226292	yes	13	NC_000013.11	27435639.0	27450897.0	-	mitochondrial translational initiation factor 3	219402.0	12.7293	15.4045	1.21016	27.3334	89.9056	3.28922	2.71801	MTIF3	gene	protein_coding
POLR2J3	NC_000007.14:102537918-102572621	OK	3.68675	8.3851	1.001784276503309	2.0024750626766945	5e-05	0.000226292	yes	7	NC_000007.14	102567051.0	102572521.0	-	DNA-directed RNA polymerase II subunit RPB11-b2	548644.0	1.73963	1.45652	0.83726	3.68675	8.38509	2.27438	2.71646	POLR2J3	CDS	with_protein
EVI5	NC_000001.11:92508695-92792413	OK	5.56369	16.2632	1.3951209072880504	2.63010593126732	5e-05	0.000226292	yes	1	NC_000001.11	92508696.0	92792413.0	-	ecotropic viral integration site 5	7813.0	8.06739	8.71377	1.08012	5.56369	16.2633	2.92311	2.70627	EVI5	gene	protein_coding
SNX29P2	NC_000016.10:29302286-29365059	OK	0.547685	1.83197	0.8716941126097496	1.829810329621338	5e-05	0.000226292	yes	16	NC_000016.10	29302287.0	29365059.0	+	sorting nexin 29 pseudogene 2	440352.0	0.31131	0.386175	1.24049	0.547685	1.83197	3.34493	2.69647	SNX29P2	gene	transcribed_pseudogene
ESCO1	NC_000018.10:21529280-21600736	OK	5.06507	10.2604	0.8926618753576991	1.856598522358357	5e-05	0.000226292	yes	18	NC_000018.10	21529281.0	21600736.0	-	establishment of sister chromatid cohesion N-acetyltransferase 1	114799.0	6.93348	5.22017	0.752893	5.06507	10.2604	2.02571	2.69057	ESCO1	gene	protein_coding
RSL1D1	NC_000016.10:11833849-11851542	OK	37.6742	112.862	1.55784299213272	2.9441332981677695	5e-05	0.000226292	yes	16	NC_000016.10	11833850.0	11851542.0	-	ribosomal L1 domain containing 1	26156.0	36.5449	40.7202	1.11425	37.6742	112.863	2.99575	2.68858	RSL1D1	gene	protein_coding
RBM34	NC_000001.11:235131182-235161280	OK	31.2402	108.082	1.7584804585057476	3.3834157356343932	5e-05	0.000226292	yes	1	NC_000001.11	235131183.0	235161280.0	-	RNA binding motif protein 34	23029.0	28.2524	36.4179	1.28902	31.2402	108.082	3.45972	2.684	RBM34	gene	protein_coding
TULP4	NC_000006.12:158232235-158511828	OK	3.88346	12.0292	1.4157729194791635	2.6680263583606707	5e-05	0.000226292	yes	6	NC_000006.12	158232236.0	158511828.0	+	TUB like protein 4	56995.0	5.47852	6.32377	1.15429	3.88346	12.0292	3.09756	2.68353	TULP4	gene	protein_coding
ST13	NC_000022.11:40824534-40856639	OK	71.8695	252.239	1.7971126070428252	3.4752399838066683	5e-05	0.000226292	yes	22	NC_000022.11	40826538.0	40856540.0	-	hsc70-interacting protein isoform 1	6767.0	88.2051	115.531	1.3098	71.8695	252.239	3.50968	2.67956	ST13	CDS	with_protein
ZNF609	NC_000015.10:64387835-64686068	OK	4.00522	12.7801	1.4610809695424338	2.7531457158726287	5e-05	0.000226292	yes	15	NC_000015.10	64460350.0	64686068.0	+	zinc finger protein 609	23060.0	8.08842	9.63286	1.19094	4.00522	12.7801	3.19085	2.67926	ZNF609	gene	protein_coding
FER	NC_000005.10:108746084-109196841	OK	1.47713	4.05966	1.030370858346049	2.0425492404516516	5e-05	0.000226292	yes	5	NC_000005.10	108746085.0	109196841.0	+	FER tyrosine kinase	2241.0	3.93014	4.03999	1.02795	1.47713	4.05966	2.74833	2.6736	FER	gene	protein_coding
HSF1	NC_000008.11:144291602-144326852	OK	1.62157	3.60607	0.8131052678486868	1.7569891324664224	5e-05	0.000226292	yes	8	NC_000008.11	144291758.0	144314330.0	+	heat shock factor protein 1	3297.0	1.48328	1.2423	0.837536	1.62157	3.60607	2.22381	2.65518	HSF1	CDS	with_protein
SERGEF	NC_000011.10:17788047-18013047	OK	35.0909	105.111	1.5558671956982124	2.9401040151395508	5e-05	0.000226292	yes	11	NC_000011.10	17788048.0	18013047.0	-	secretion regulating guanine nucleotide exchange factor	26297.0	22.5654	25.4781	1.12908	35.0909	105.111	2.99539	2.65296	SERGEF	gene	protein_coding
STOX2	NC_000004.12:183796330-184023530	OK	1.74345	5.42783	1.2283404912458253	2.342973263591463	5e-05	0.000226292	yes	4	NC_000004.12	183796331.0	184023530.0	+	storkhead box 2	56977.0	2.93366	3.44881	1.1756	1.74345	5.42783	3.11327	2.64824	STOX2	gene	protein_coding
EIF3H	NC_000008.11:116642129-116755823	OK	31.0475	104.258	1.7156461648019432	3.2844371635853036	5e-05	0.000226292	yes	8	NC_000008.11	116642130.0	116755823.0	-	eukaryotic translation initiation factor 3 subunit H	8667.0	26.2486	33.2915	1.26832	31.0475	104.258	3.35801	2.64761	EIF3H	gene	protein_coding
ATXN1	NC_000006.12:16299111-16766883	OK	1.93171	5.28235	1.099561918655528	2.142896125469436	5e-05	0.000226292	yes	6	NC_000006.12	16299112.0	16761490.0	-	ataxin 1	6310.0	1.82682	1.89443	1.03701	1.93171	5.28235	2.73454	2.63694	ATXN1	gene	protein_coding
CEP192	NC_000018.10:12991300-13125053	OK	4.85477	12.9463	1.2521980191813062	2.3820406267026715	5e-05	0.000226292	yes	18	NC_000018.10	12991301.0	13125053.0	+	centrosomal protein 192	55125.0	7.70637	7.83243	1.01636	4.85478	12.9463	2.66672	2.6238	CEP192	gene	protein_coding
WAC-AS1	NC_000010.11:28519916-28532354	OK	1.82135	5.55909	1.217110021766315	2.324805500912684	5e-05	0.000226292	yes	10	NC_000010.11	28519917.0	28532354.0	-	WAC antisense RNA 1 (head to head)	220906.0	1.66549	1.93776	1.16348	1.82135	5.55909	3.05218	2.62333	WAC-AS1	gene	lncRNA
ERGIC2	NC_000012.12:29336543-29381172	OK	4.45361	10.9599	1.1329218881525556	2.193024437024283	5e-05	0.000226292	yes	12	NC_000012.12	29341156.0	29371633.0	-	endoplasmic reticulum-Golgi intermediate compartment protein 2	51290.0	3.98745	3.76653	0.944598	4.45361	10.9599	2.4609	2.60523	ERGIC2	CDS	with_protein
ERGIC1	NC_000005.10:172834250-172952683	OK	47.4041	120.091	1.3228904825567511	2.501668247111298	5e-05	0.000226292	yes	5	NC_000005.10	172834251.0	172952683.0	+	endoplasmic reticulum-golgi intermediate compartment 1	57222.0	27.8741	27.261	0.978005	47.4041	120.091	2.53334	2.59031	ERGIC1	gene	protein_coding
LARP1B	NC_000004.12:128060654-128222931	OK	9.95638	18.9431	0.8641184739072627	1.82022711881114	5e-05	0.000226292	yes	4	NC_000004.12	128060655.0	128222931.0	+	La ribonucleoprotein 1B	55132.0	11.9834	8.82972	0.736827	9.95637	18.9431	1.90261	2.58216	LARP1B	gene	protein_coding
OMA1	NC_000001.11:56987525-58546726	OK	9.62098	23.9014	1.2293099653461517	2.3445482431941316	5e-05	0.000226292	yes	1	NC_000001.11	58480965.0	58539294.0	-	metalloendopeptidase OMA1, mitochondrial precursor	115209.0	13.3915	12.92	0.964794	9.62099	23.9014	2.4843	2.57496	OMA1	CDS	with_protein
THEM4	NC_000001.11:151870865-151909511	OK	15.0139	41.8493	1.4199469338738968	2.6757566863787083	5e-05	0.000226292	yes	1	NC_000001.11	151874888.0	151909458.0	-	acyl-coenzyme A thioesterase THEM4	117145.0	9.81747	10.6521	1.08501	15.0139	41.8493	2.78737	2.56898	THEM4	CDS	with_protein
RCN1	NC_000011.10:32091073-32105722	OK	26.2552	76.2239	1.5025159089264575	2.8333639085385545	5e-05	0.000226292	yes	11	NC_000011.10	32091074.0	32105722.0	+	reticulocalbin 1	5954.0	27.9617	31.9774	1.14361	26.2552	76.2239	2.90319	2.53862	RCN1	gene	protein_coding
UXS1	NC_000002.12:106093302-106194336	OK	7.94497	20.129	1.2400759397317387	2.3621096549233815	5e-05	0.000226292	yes	2	NC_000002.12	106093303.0	106194336.0	-	UDP-glucuronate decarboxylase 1	80146.0	7.14434	7.13311	0.998428	7.94497	20.129	2.53355	2.53754	UXS1	gene	protein_coding
IFNAR1	NC_000021.9:33324394-33359864	OK	2.62291	6.1953	0.9899058728409116	1.986055408497589	5e-05	0.000226292	yes	21	NC_000021.9	33324395.0	33359864.0	+	interferon alpha and beta receptor subunit 1	3454.0	3.69511	3.44763	0.933023	2.62291	6.1953	2.36199	2.53155	IFNAR1	gene	protein_coding
FAM120AOS	NC_000009.12:93443331-93566112	OK	14.2972	33.5196	1.1741481410779375	2.2565959783489786	5e-05	0.000226292	yes	9	NC_000009.12	93443332.0	93453601.0	-	family with sequence similarity 120A opposite strand	158293.0	10.6332	9.86608	0.927856	14.2972	33.5196	2.34449	2.52678	FAM120AOS	gene	protein_coding
MAPKAP1	NC_000009.12:125425067-125707208	OK	40.8444	104.601	1.3355170303442616	2.5236590798290806	5e-05	0.000226292	yes	9	NC_000009.12	125437394.0	125707208.0	-	MAPK associated protein 1	79109.0	28.69	29.1397	1.01567	40.8444	104.601	2.56096	2.52143	MAPKAP1	gene	protein_coding
PSMC3IP	NC_000017.11:42567099-42577831	OK	52.9501	83.0725	0.640008340220005	1.558338168047881	5e-05	0.000226292	yes	17	NC_000017.11	42572968.0	42577686.0	-	homologous-pairing protein 2 homolog isoform 1	29893.0	33.0183	20.6958	0.626798	52.9501	83.0725	1.56888	2.50301	PSMC3IP	CDS	with_protein
VTI1B	NC_000014.9:67619919-67674632	OK	16.385	48.6921	1.515173444747374	2.85833189531205	5e-05	0.000226292	yes	14	NC_000014.9	67647085.0	67674632.0	-	vesicle transport through interaction with t-SNAREs 1B	10490.0	10.1918	12.1373	1.19088	16.385	48.6921	2.97174	2.49541	VTI1B	gene	protein_coding
MFF	NC_000002.12:227325232-227357836	OK	26.0853	66.7432	1.3225660669762327	2.5011057658582327	5e-05	0.000226292	yes	2	NC_000002.12	227325233.0	227357836.0	+	mitochondrial fission factor	56947.0	22.7649	23.4184	1.02871	26.0853	66.7432	2.55866	2.48725	MFF	gene	protein_coding
R3HDM1	NC_000002.12:135531428-135725270	OK	14.0078	29.7639	1.0355259010186426	2.0498607390823436	5e-05	0.000226292	yes	2	NC_000002.12	135531429.0	135725270.0	+	R3H domain containing 1	23518.0	13.8038	11.9094	0.862765	14.0078	29.7639	2.12482	2.4628	R3HDM1	gene	protein_coding
ECI2	NC_000006.12:4021299-4135591	OK	35.9187	107.311	1.5527561115465778	2.9337706907339642	5e-05	0.000226292	yes	6	NC_000006.12	4115693.0	4135591.0	-	enoyl-CoA delta isomerase 2	10455.0	37.2701	45.5888	1.2232	35.9187	107.311	2.98761	2.44246	ECI2	gene	protein_coding
NIPBL	NC_000005.10:36876768-37250646	OK	5.76623	12.3264	0.9778629790771736	1.969545817981357	5e-05	0.000226292	yes	5	NC_000005.10	36876769.0	37066413.0	+	NIPBL cohesin loading factor	25836.0	12.9704	11.3621	0.876004	5.76623	12.3264	2.13769	2.44027	NIPBL	gene	protein_coding
BMPR1B	NC_000004.12:94757954-95158453	OK	0.885464	1.24256	0.25022698043779323	1.1893942286885353	0.0006	0.0021586	yes	4	NC_000004.12	94757955.0	95158453.0	+	bone morphogenetic protein receptor type 1B	658.0	1.12295	0.646444	0.575666	0.885465	1.24256	1.40329	2.43768	BMPR1B	gene	protein_coding
AKAP9	NC_000007.14:91940861-92180725	OK	1.949	5.11974	1.0532445382505187	2.0751915903696165	5e-05	0.000226292	yes	7	NC_000007.14	91941100.0	92110159.0	+	A-kinase anchor protein 9 isoform 2	10142.0	3.67228	3.97311	1.08192	1.949	5.11974	2.62685	2.42796	AKAP9	CDS	with_protein
EIF3E	NC_000008.11:108201215-108248734	OK	95.6778	326.316	1.7594275779177408	3.3856376541460396	5e-05	0.000226292	yes	8	NC_000008.11	108201216.0	108248734.0	-	eukaryotic translation initiation factor 3 subunit E	3646.0	116.513	163.751	1.40543	95.6778	326.317	3.41058	2.42672	EIF3E	gene	protein_coding
KRBA2	NC_000017.11:8358412-8376704	OK	0.561921	1.23513	0.5170372584917265	1.4310134763537978	0.00075	0.00263811	yes	17	NC_000017.11	8358822.0	8376704.0	-	KRAB-A domain containing 2	124751.0	1.16143	1.05215	0.905911	0.561921	1.23513	2.19804	2.42633	KRBA2	gene	protein_coding
SETD2	NC_000003.12:47016430-47164113	OK	5.70521	13.185	1.0810117289978862	2.1155191261720363	5e-05	0.000226292	yes	3	NC_000003.12	47017093.0	47163924.0	-	histone-lysine N-methyltransferase SETD2 isoform 1	29072.0	12.832	12.2251	0.952704	5.70521	13.185	2.31105	2.42578	SETD2	CDS	with_protein
ZNF277	NC_000007.14:112206611-112343934	OK	9.66718	25.8631	1.3324469688669294	2.5182944320804563	5e-05	0.000226292	yes	7	NC_000007.14	112206612.0	112343934.0	+	zinc finger protein 277	11179.0	8.73292	9.64152	1.10404	9.66718	25.8631	2.67535	2.42323	ZNF277	gene	protein_coding
TWF1	NC_000012.12:43793722-44389758	OK	6.30729	14.9227	1.1236766243568974	2.179015750024975	5e-05	0.000226292	yes	12	NC_000012.12	43793723.0	43806317.0	-	twinfilin actin binding protein 1	5756.0	9.8449	9.69762	0.98504	6.30729	14.9227	2.36595	2.40188	TWF1	gene	protein_coding
GALNT11	NC_000007.14:152025673-152133319	OK	13.6848	29.9232	1.0743660032334015	2.1057964698191336	5e-05	0.000226292	yes	7	NC_000007.14	152025674.0	152122345.0	+	polypeptide N-acetylgalactosaminyltransferase 11	63917.0	12.3149	11.2908	0.916838	13.6848	29.9232	2.1866	2.38494	GALNT11	gene	protein_coding
LOC644215	NC_000010.11:97418746-97426057	OK	1.73495	2.85863	0.49657425389494714	1.4108594307025724	0.00205	0.00643794	yes	10	NC_000010.11	97418747.0	97426057.0	-	uncharacterized LOC644215	644215.0	2.6742	1.85003	0.691808	1.73496	2.85863	1.64767	2.38168	LOC644215	gene	lncRNA
ZMYND11	NC_000010.11:130087-254637	OK	7.86508	21.2783	1.3294335930929213	2.513039927445663	5e-05	0.000226292	yes	10	NC_000010.11	180013.0	252470.0	+	zinc finger MYND domain-containing protein 11 isoform a	10771.0	8.18274	9.2984	1.13634	7.86508	21.2784	2.70542	2.38081	ZMYND11	CDS	with_protein
OAF	NC_000011.10:120211031-120230334	OK	13.2695	38.1435	1.455837975720951	2.74315848488034	5e-05	0.000226292	yes	11	NC_000011.10	120211032.0	120230334.0	+	out at first homolog	220323.0	8.58502	10.4083	1.21238	13.2695	38.1435	2.87453	2.37097	OAF	gene	protein_coding
MAP7	NC_000006.12:136342733-136550422	OK	2.13615	4.8091	0.8893201008972322	1.8523029829568103	5e-05	0.000226292	yes	6	NC_000006.12	136344228.0	136525964.0	-	ensconsin isoform 1	9053.0	2.67116	2.56493	0.96023	2.13615	4.8091	2.25129	2.34453	MAP7	CDS	with_protein
STK33	NC_000011.10:8335028-8594228	OK	3.34471	9.70655	1.3011618829325342	2.4642726442041005	5e-05	0.000226292	yes	11	NC_000011.10	8335029.0	8594228.0	-	serine/threonine kinase 33	65975.0	2.35628	2.9283	1.24276	3.34471	9.70655	2.90206	2.33517	STK33	gene	protein_coding
METTL5	NC_000002.12:169798870-169824905	OK	38.7023	87.4847	1.1562054317829205	2.228704634240334	5e-05	0.000226292	yes	2	NC_000002.12	169811757.0	169824905.0	-	methyltransferase like 5	29081.0	32.6663	31.7609	0.972285	38.7023	87.4847	2.26045	2.32488	METTL5	gene	protein_coding
TPRKB	NC_000002.12:73729872-73737345	OK	20.7383	35.8701	0.7622122076358187	1.6960893906147225	5e-05	0.000226292	yes	2	NC_000002.12	73729943.0	73734569.0	-	EKC/KEOPS complex subunit TPRKB isoform a	51002.0	18.2505	13.584	0.744306	20.7383	35.8701	1.72966	2.32385	TPRKB	CDS	with_protein
ADIPOR1	NC_000001.11:202940824-202958572	OK	77.7425	167.615	1.098518461680376	2.1413467949328506	5e-05	0.000226292	yes	1	NC_000001.11	202940825.0	202958572.0	-	adiponectin receptor 1	51094.0	45.5153	42.4617	0.932911	77.7424	167.615	2.15603	2.31107	ADIPOR1	gene	protein_coding
PDE10A	NC_000006.12:165327286-165989615	OK	0.751755	1.58855	0.5633431712311342	1.4776895170842954	5e-05	0.000226292	yes	6	NC_000006.12	165333025.0	165662013.0	-	cAMP and cAMP-inhibited cGMP 3',5'-cyclic phosphodiesterase 10A isoform 1	10846.0	1.38473	1.27228	0.918789	0.751755	1.58854	2.11311	2.29989	PDE10A	CDS	with_protein
KIAA1958	NC_000009.12:112380051-112669397	OK	1.83074	5.14442	1.1180975888624756	2.170605566035736	5e-05	0.000226292	yes	9	NC_000009.12	112486827.0	112669397.0	+	KIAA1958	158405.0	4.15708	5.09374	1.22532	1.83074	5.14442	2.81002	2.2933	KIAA1958	gene	protein_coding
YBX3	NC_000012.12:10699083-10723442	OK	199.087	556.99	1.4796118311875768	2.78873689944874	5e-05	0.000226292	yes	12	NC_000012.12	10699084.0	10723442.0	-	Y-box binding protein 3	8531.0	111.163	135.797	1.22161	199.087	556.99	2.79773	2.2902	YBX3	gene	protein_coding
NACA	NC_000012.12:56712426-56725299	OK	1194.39	3561.04	1.5752223381999801	2.9798141192414214	5e-05	0.000226292	yes	12	NC_000012.12	56712427.0	56725299.0	-	nascent polypeptide associated complex subunit alpha	4666.0	549.634	717.116	1.30472	1194.4	3561.04	2.98146	2.28514	NACA	gene	protein_coding
BPTF	NC_000017.11:67825502-67984378	OK	6.17551	17.3085	1.3513603169649628	2.5515259542527295	5e-05	0.000226292	yes	17	NC_000017.11	67825503.0	67984378.0	+	bromodomain PHD finger transcription factor	2186.0	14.1515	17.3991	1.22949	6.17551	17.3085	2.80276	2.27962	BPTF	gene	protein_coding
PKIA	NC_000008.11:78167758-78665967	OK	1.58524	3.51321	0.8038556898907812	1.7457605483436742	5e-05	0.000226292	yes	8	NC_000008.11	78516340.0	78605267.0	+	cAMP-dependent protein kinase inhibitor alpha	5569.0	1.29572	1.2613	0.973437	1.58524	3.51321	2.21621	2.27668	PKIA	gene	protein_coding
DZIP1	NC_000013.11:95433587-95644706	OK	26.8299	68.2693	1.3155803700671926	2.4890243946259245	5e-05	0.000226292	yes	13	NC_000013.11	95578202.0	95644706.0	-	DAZ interacting zinc finger protein 1	22873.0	19.7496	22.1595	1.12203	26.8299	68.2693	2.54453	2.2678	DZIP1	gene	protein_coding
NSMCE2	NC_000008.11:125024259-125367125	OK	27.8989	47.4389	0.7451515237992821	1.6761503032987408	5e-05	0.000226292	yes	8	NC_000008.11	125102331.0	125366885.0	+	E3 SUMO-protein ligase NSE2 isoform 1	286053.0	22.9099	17.2754	0.754058	27.8989	47.4389	1.70038	2.25498	NSMCE2	CDS	with_protein
MAP3K4	NC_000006.12:160991520-161117385	OK	7.67236	16.7835	1.0360427402677352	2.0505952243679917	5e-05	0.000226292	yes	6	NC_000006.12	160991521.0	161117385.0	+	mitogen-activated protein kinase kinase kinase 4	4216.0	9.62089	9.34113	0.970922	7.67236	16.7835	2.18753	2.25304	MAP3K4	gene	protein_coding
POLN	NC_000004.12:2071917-2242121	OK	1.58177	3.61512	0.8380076783859265	1.787579838637834	5e-05	0.000226292	yes	4	NC_000004.12	2071918.0	2242121.0	-	DNA polymerase nu	353497.0	1.57403	1.59897	1.01584	1.58177	3.61512	2.28548	2.24984	POLN	gene	protein_coding
LMTK2	NC_000007.14:98106861-98209638	OK	3.25527	6.6429	0.8448694793264604	1.7961022449809296	5e-05	0.000226292	yes	7	NC_000007.14	98106862.0	98209638.0	+	lemur tyrosine kinase 2	22853.0	4.85437	4.40843	0.908136	3.25527	6.6429	2.04066	2.24708	LMTK2	gene	protein_coding
URI1	NC_000019.10:29923649-30016612	OK	24.1667	57.3084	1.2121876807495395	2.3168869975006654	5e-05	0.000226292	yes	19	NC_000019.10	29942548.0	30015069.0	+	unconventional prefoldin RPB5 interactor 1 isoform a	8725.0	11.7964	12.5493	1.06382	24.1667	57.3083	2.37138	2.22911	URI1	CDS	with_protein
ARHGAP5	NC_000014.9:32072587-32159728	OK	7.25948	16.9162	1.1171418158366255	2.169168034791536	5e-05	0.000226292	yes	14	NC_000014.9	32072588.0	32159728.0	+	Rho GTPase activating protein 5	394.0	10.1389	10.6555	1.05095	7.25948	16.9162	2.33022	2.21726	ARHGAP5	gene	protein_coding
GOLGA4	NC_000003.12:37241790-37366879	OK	3.55	9.5639	1.215204099417174	2.3217362637362644	5e-05	0.000226292	yes	3	NC_000003.12	37243269.0	37366879.0	+	golgin A4	2803.0	4.6378	5.64393	1.21694	3.55	9.56392	2.69406	2.2138	GOLGA4	gene	protein_coding
RNF130	NC_000005.10:179911650-180071759	OK	29.8753	66.0038	1.1177897630262805	2.1701424763484085	5e-05	0.000226292	yes	5	NC_000005.10	179955654.0	180071702.0	-	E3 ubiquitin-protein ligase RNF130 isoform 1 precursor	55819.0	19.6774	19.6556	0.99889	29.8753	66.0038	2.20931	2.21176	RNF130	CDS	with_protein
CCT6A	NC_000007.14:56051764-56063989	OK	63.2968	152.242	1.252992917292997	2.383353448383123	5e-05	0.000226292	yes	7	NC_000007.14	56051765.0	56063989.0	+	chaperonin containing TCP1 subunit 6A	908.0	94.8026	103.606	1.09286	63.2968	152.242	2.4052	2.20084	CCT6A	gene	protein_coding
HOMER2	NC_000015.10:82836945-82986176	OK	36.9916	104.029	1.467035354626434	2.7645321597405728	5e-05	0.000226292	yes	15	NC_000015.10	82849715.0	82952535.0	-	homer protein homolog 2 isoform 1	9455.0	22.0015	28.1338	1.27872	36.9916	104.029	2.81224	2.19926	HOMER2	CDS	with_protein
SLC35F2	NC_000011.10:107790990-107858787	OK	10.4466	17.0555	0.6575192363404705	1.577367952055632	5e-05	0.000226292	yes	11	NC_000011.10	107790991.0	107858787.0	-	solute carrier family 35 member F2	54733.0	10.3768	7.73309	0.745231	10.4466	17.0555	1.63264	2.19079	SLC35F2	gene	protein_coding
RARS2	NC_000006.12:87513937-87589996	OK	16.8478	30.6732	0.8275163806455303	1.7746276852048988	5e-05	0.000226292	yes	6	NC_000006.12	87513938.0	87589996.0	-	arginyl-tRNA synthetase 2, mitochondrial	57038.0	14.722	12.2543	0.83238	16.8478	30.6732	1.82061	2.18723	RARS2	gene	protein_coding
UBA2	NC_000019.10:34428175-34471251	OK	47.5539	111.004	1.2058911690293401	2.3067971882794174	5e-05	0.000226292	yes	19	NC_000019.10	34428433.0	34469221.0	+	SUMO-activating enzyme subunit 2	10054.0	60.5868	65.1249	1.0749	47.5539	111.003	2.33427	2.17161	UBA2	CDS	with_protein
SEC63	NC_000006.12:107867755-107958208	OK	9.27701	15.0139	0.6399041153821492	1.5582255928523963	5e-05	0.000226292	yes	6	NC_000006.12	107867756.0	107958208.0	-	SEC63 homolog, protein translocation regulator	11231.0	11.7004	8.7345	0.746515	9.27702	15.0139	1.6184	2.16794	SEC63	gene	protein_coding
LRRFIP2	NC_000003.12:37052625-37199669	OK	14.6697	32.6126	1.1010245828827427	2.145069784360901	5e-05	0.000226292	yes	3	NC_000003.12	37053851.0	37148983.0	-	leucine-rich repeat flightless-interacting protein 2 isoform a	9209.0	11.7589	12.0703	1.02648	14.6697	32.6126	2.22313	2.16577	LRRFIP2	CDS	with_protein
ZNF516	NC_000018.10:76357681-76495255	OK	3.65728	11.5196	1.4266289429965262	2.6881785076267692	5e-05	0.000226292	yes	18	NC_000018.10	76357682.0	76495255.0	-	zinc finger protein 516	9658.0	7.68002	11.2525	1.46516	3.65728	11.5196	3.14976	2.14977	ZNF516	gene	protein_coding
HNRNPR	NC_000001.11:23304687-23344316	OK	0.415463	1.26365	0.6773768715563295	1.5992293687648493	5e-05	0.000226292	yes	1	NC_000001.11	23304688.0	23344316.0	-	heterogeneous nuclear ribonucleoprotein R	10236.0	0.630192	0.891963	1.41538	0.415463	1.26365	3.04155	2.14893	HNRNPR	gene	protein_coding
CTSA	NC_000020.11:45886490-45912155	OK	4.98725	14.4694	1.3694518242279528	2.583723746294209	5e-05	0.000226292	yes	20	NC_000020.11	45890144.0	45898820.0	+	cathepsin A	5476.0	5.5642	7.52789	1.35292	4.98725	14.4694	2.90127	2.14446	CTSA	gene	protein_coding
TMEM183A	NC_000001.11:203007373-203024848	OK	55.9745	113.878	1.01171427372282	2.0163055401978083	5e-05	0.000226292	yes	1	NC_000001.11	203007374.0	203024848.0	+	transmembrane protein 183A	92703.0	34.9351	33.1765	0.949661	55.9745	113.878	2.03446	2.1423	TMEM183A	gene	protein_coding
CEP350	NC_000001.11:179954772-180114875	OK	3.35306	6.30716	0.7472808919016347	1.6786260699370097	5e-05	0.000226292	yes	1	NC_000001.11	179954773.0	180114875.0	+	centrosomal protein 350	9857.0	8.5812	7.53681	0.878293	3.35306	6.30716	1.88102	2.14167	CEP350	gene	protein_coding
NELFE	NC_000006.12:31952086-31959043	OK	0.796383	2.13857	0.8050124115180304	1.7471608226085418	5e-05	0.000226292	yes	6	NC_000006.12	31952087.0	31959043.0	-	negative elongation factor complex member E	7936.0	0.948535	1.19013	1.25471	0.796383	2.13857	2.68536	2.14023	NELFE	gene	protein_coding
NR3C2	NC_000004.12:148078763-148444698	OK	1.95209	3.86929	0.7219747203313742	1.649438194634987	5e-05	0.000226292	yes	4	NC_000004.12	148081344.0	148436860.0	-	mineralocorticoid receptor isoform 1	4306.0	2.59604	2.40681	0.927109	1.95209	3.86929	1.98213	2.13796	NR3C2	CDS	with_protein
N4BP2L2	NC_000013.11:32432484-32542710	OK	14.3148	27.9115	0.91671693481134	1.887814401755165	5e-05	0.000226292	yes	13	NC_000013.11	32432485.0	32542710.0	-	NEDD4 binding protein 2 like 2	10443.0	16.6223	15.1806	0.913265	14.3148	27.9115	1.94984	2.13502	N4BP2L2	gene	protein_coding
NFATC3	NC_000016.10:68085369-68236175	OK	8.08468	14.5844	0.7785950094365601	1.7154594328033568	5e-05	0.000226292	yes	16	NC_000016.10	68085370.0	68229259.0	+	nuclear factor of activated T cells 3	4775.0	9.04844	7.65044	0.845498	8.08468	14.5844	1.80395	2.1336	NFATC3	gene	protein_coding
CEP112	NC_000017.11:65635536-66192133	OK	5.29496	11.3671	0.9742381221119696	1.9646034287747665	5e-05	0.000226292	yes	17	NC_000017.11	65635537.0	66192133.0	-	centrosomal protein 112	201134.0	4.04534	4.07644	1.00769	5.29496	11.367	2.14676	2.13039	CEP112	gene	protein_coding
MAP3K13	NC_000003.12:185282937-185499057	OK	9.1562	19.0683	0.982557699638817	1.9759654201374528	5e-05	0.000226292	yes	3	NC_000003.12	185282938.0	185489094.0	+	mitogen-activated protein kinase kinase kinase 13	9175.0	5.78938	5.66973	0.979333	9.15621	19.0683	2.08255	2.1265	MAP3K13	gene	protein_coding
GDE1	NC_000016.10:19501692-19522098	OK	23.8366	49.2283	1.0160327574494232	2.0223500801236884	5e-05	0.000226292	yes	16	NC_000016.10	19501693.0	19522098.0	-	glycerophosphodiester phosphodiesterase 1	51573.0	23.679	23.0639	0.974023	23.8366	49.2283	2.06524	2.12032	GDE1	gene	protein_coding
LINC00641	NC_000014.9:21200078-21206900	OK	2.06721	3.29783	0.48668147258201655	1.401218045063755	5e-05	0.000226292	yes	14	NC_000014.9	21200079.0	21206900.0	-	long intergenic non-protein coding RNA 641	283624.0	6.35782	4.79591	0.754333	2.06721	3.29783	1.5953	2.11486	LINC00641	gene	lncRNA
KIAA0232	NC_000004.12:6782726-6884164	OK	2.47434	5.28054	0.8541496636337758	1.8076929719025774	5e-05	0.000226292	yes	4	NC_000004.12	6782727.0	6884164.0	+	KIAA0232	9778.0	4.92076	4.96584	1.00916	2.47434	5.28054	2.13412	2.11474	KIAA0232	gene	protein_coding
ATXN2	NC_000012.12:111452213-111600255	OK	11.7816	19.2193	0.6616646073672618	1.5819068035300745	5e-05	0.000226292	yes	12	NC_000012.12	111452214.0	111599673.0	-	ataxin 2	6311.0	15.5177	11.9738	0.771623	11.7816	19.2193	1.6313	2.11411	ATXN2	gene	protein_coding
PCMTD1	NC_000008.11:51817574-51899186	OK	2.40805	3.46526	0.3897976803093952	1.3102096506800074	0.00575	0.0159176	yes	8	NC_000008.11	51817575.0	51899186.0	-	protein-L-isoaspartate (D-aspartate) O-methyltransferase domain containing 1	115294.0	3.95302	2.69914	0.682804	2.40805	3.46526	1.43903	2.10753	PCMTD1	gene	protein_coding
FADS1	NC_000011.10:61799626-61867354	OK	17.0332	36.2436	1.046337105427022	2.0652795954129046	5e-05	0.000226292	yes	11	NC_000011.10	61802411.0	61816929.0	-	acyl-CoA (8-3)-desaturase	3992.0	19.5042	19.7526	1.01273	17.0332	36.2436	2.12783	2.10107	FADS1	CDS	with_protein
DUS1L	NC_000017.11:82047901-82065815	OK	91.9821	252.74	1.4483260516068466	2.7289123390416004	5e-05	0.000226292	yes	17	NC_000017.11	82057506.0	82065815.0	-	dihydrouridine synthase 1 like	64118.0	48.9974	64.2576	1.31145	91.9821	252.74	2.74771	2.09517	DUS1L	gene	protein_coding
PABPC1	NC_000008.11:100702915-100722088	OK	259.798	676.587	1.377473389866438	2.5981295868833345	5e-05	0.000226292	yes	8	NC_000008.11	100702916.0	100722088.0	-	poly(A) binding protein cytoplasmic 1	26986.0	248.495	309.883	1.24704	259.798	676.587	2.60428	2.08837	PABPC1	gene	protein_coding
RAB3IP	NC_000012.12:69713634-69823204	OK	5.31164	9.19346	0.6915570082739655	1.6150255718006734	0.0002	0.000805209	yes	12	NC_000012.12	69738007.0	69823204.0	+	RAB3A interacting protein	117177.0	4.67012	3.87253	0.829214	5.31163	9.19346	1.73082	2.0873	RAB3IP	gene	protein_coding
FUT8	NC_000014.9:65410591-65744122	OK	4.55426	6.9799	0.5227759548348363	1.4367170424142908	5e-05	0.000226292	yes	14	NC_000014.9	65561564.0	65742410.0	+	alpha-(1,6)-fucosyltransferase isoform a	2530.0	5.05283	3.71553	0.735337	4.55426	6.9799	1.53261	2.08423	FUT8	CDS	with_protein
ZNF514	NC_000002.12:95122986-95165187	OK	2.52028	5.63846	0.9151584176750027	1.8857761314440895	5e-05	0.000226292	yes	2	NC_000002.12	95122987.0	95165187.0	-	zinc finger protein 514	84874.0	3.15304	3.38673	1.07412	2.52028	5.63846	2.23724	2.08286	ZNF514	gene	protein_coding
UTP23	NC_000008.11:116766523-116774684	OK	3.94487	7.42724	0.7691276191760101	1.7042389385363017	5e-05	0.000226292	yes	8	NC_000008.11	116766604.0	116771842.0	+	rRNA-processing protein UTP23 homolog	84294.0	4.6168	4.1752	0.904349	3.94487	7.42724	1.88276	2.08189	UTP23	CDS	with_protein
MTHFD2L	NC_000004.12:74115443-74330322	OK	8.0361	16.246	0.932489643281436	1.9085667489292943	5e-05	0.000226292	yes	4	NC_000004.12	74123273.0	74303099.0	+	methylenetetrahydrofolate dehydrogenase (NADP+ dependent) 2 like	441024.0	6.67997	6.49163	0.971805	8.0361	16.246	2.02163	2.08029	MTHFD2L	gene	protein_coding
CMBL	NC_000005.10:10277594-10307902	OK	4.02503	9.95368	1.1242115248249305	2.179823802046953	5e-05	0.000226292	yes	5	NC_000005.10	10277595.0	10307902.0	-	carboxymethylenebutenolidase homolog	134147.0	5.06372	6.02527	1.18989	4.02503	9.9537	2.47295	2.0783	CMBL	gene	protein_coding
NUP54	NC_000004.12:76114663-76148434	OK	24.8284	41.0591	0.7034597038052812	1.6284051664059715	5e-05	0.000226292	yes	4	NC_000004.12	76114664.0	76148434.0	-	nucleoporin 54	53371.0	28.4804	22.673	0.796091	24.8284	41.0592	1.65372	2.0773	NUP54	gene	protein_coding
FOXM1	NC_000012.12:2740074-2889524	OK	64.926	125.996	0.9458636021476412	1.926341655795892	5e-05	0.000226292	yes	12	NC_000012.12	2857680.0	2877174.0	-	forkhead box M1	2305.0	38.7398	36.1988	0.934408	64.926	125.996	1.94061	2.07684	FOXM1	gene	protein_coding
LOC441242	NC_000007.14:65647009-65770810	OK	1.46806	2.90175	0.660743874251601	1.5808975470612545	0.01255	0.0311703	yes	7	NC_000007.14	65647010.0	65770810.0	-	uncharacterized LOC441242	441242.0	1.67189	1.59152	0.951929	1.46806	2.90175	1.97659	2.0764	LOC441242	gene	lncRNA
RAP1A	NC_000001.11:111483347-111716695	OK	3.68592	9.09618	1.1074053075608274	2.1545779697476704	5e-05	0.000226292	yes	1	NC_000001.11	111542009.0	111716695.0	+	RAP1A, member of RAS oncogene family	5906.0	4.27219	5.08493	1.19024	3.68591	9.09618	2.46782	2.07338	RAP1A	gene	protein_coding
RPAP2	NC_000001.11:92217914-92441936	OK	11.9891	20.4566	0.7241200140655395	1.6518927408365474	5e-05	0.000226292	yes	1	NC_000001.11	92299074.0	92387011.0	+	putative RNA polymerase II subunit B1 CTD phosphatase RPAP2	79871.0	16.0025	13.1997	0.824854	11.9891	20.4566	1.70626	2.06856	RPAP2	CDS	with_protein
C2orf69	NC_000002.12:199911292-199928273	OK	2.55881	5.68723	0.9100138267103466	1.879063507183581	5e-05	0.000226292	yes	2	NC_000002.12	199911293.0	199928273.0	+	chromosome 2 open reading frame 69	205327.0	3.49759	3.76924	1.07767	2.55881	5.68723	2.22261	2.06243	C2orf69	gene	protein_coding
CEP128	NC_000014.9:80478320-81172672	OK	3.87426	8.7591	1.0015648977198848	2.0021705858940635	5e-05	0.000226292	yes	14	NC_000014.9	80478321.0	80959501.0	-	centrosomal protein 128	145508.0	3.2847	3.60262	1.09679	3.87426	8.7591	2.26085	2.06133	CEP128	gene	protein_coding
CLEC16A	NC_000016.10:10944538-11193272	OK	7.88845	18.1449	1.1069563608138822	2.15390759918771	5e-05	0.000226292	yes	16	NC_000016.10	10944539.0	11193272.0	+	C-type lectin domain containing 16A	23274.0	7.23621	8.08052	1.11668	7.88845	18.1449	2.30019	2.05984	CLEC16A	gene	protein_coding
LRRC37A4P	NC_000017.11:45502894-45562811	OK	0.285103	0.570242	0.2891029242453816	1.2218802695192525	5e-05	0.000226292	yes	17	NC_000017.11	45505883.0	45520523.0	-	leucine rich repeat containing 37 member A4, pseudogene	55073.0	0.469027	0.45571	0.971608	0.285103	0.570242	2.00013	2.05857	LRRC37A4P	gene	transcribed_pseudogene
TMED5	NC_000001.11:93149741-93279186	OK	5.66299	10.0071	0.7241927839456883	1.6519760647997372	5e-05	0.000226292	yes	1	NC_000001.11	93154670.0	93180242.0	-	transmembrane emp24 domain-containing protein 5 isoform 1 precursor	50999.0	7.9676	6.84573	0.859196	5.66299	10.0071	1.7671	2.05669	TMED5	CDS	with_protein
CHD7	NC_000008.11:60678739-60868028	OK	5.43245	13.2467	1.147187539867689	2.2148170603735746	5e-05	0.000226292	yes	8	NC_000008.11	60678740.0	60868028.0	+	chromodomain helicase DNA binding protein 7	55636.0	12.4694	14.7945	1.18646	5.43245	13.2467	2.43843	2.05521	CHD7	gene	protein_coding
ZZZ3	NC_000001.11:77561525-77683440	OK	15.1391	30.141	0.9482551442998108	1.9295375826409167	5e-05	0.000226292	yes	1	NC_000001.11	77561526.0	77683440.0	-	zinc finger ZZ-type containing 3	26009.0	20.9012	20.255	0.969083	15.1392	30.141	1.99093	2.05445	ZZZ3	gene	protein_coding
DLGAP5	NC_000014.9:55148129-55191585	OK	14.5478	25.636	0.7766669905474215	1.7131684225420956	5e-05	0.000226292	yes	14	NC_000014.9	55148351.0	55189179.0	-	disks large-associated protein 5 isoform a	9787.0	21.7083	18.6407	0.85869	14.5478	25.636	1.76219	2.05219	DLGAP5	CDS	with_protein
EIF3F	NC_000011.10:7987336-8001852	OK	36.5693	103.71	1.478773088200663	2.787116076157927	5e-05	0.000226292	yes	11	NC_000011.10	7987337.0	8001852.0	+	eukaryotic translation initiation factor 3 subunit F	8665.0	23.4814	32.4663	1.38264	36.5693	103.71	2.83598	2.05113	EIF3F	gene	protein_coding
CYP51A1	NC_000007.14:91940861-92180725	OK	13.4429	25.987	0.9019041579923068	1.868530558267384	5e-05	0.000226292	yes	7	NC_000007.14	92112153.0	92134803.0	-	cytochrome P450 family 51 subfamily A member 1	1595.0	21.1029	19.8898	0.942515	13.4429	25.987	1.93314	2.05104	CYP51A1	gene	protein_coding
VEZT	NC_000012.12:95217745-95302799	OK	10.2041	16.0496	0.6057111275599234	1.5217286529038476	5e-05	0.000226292	yes	12	NC_000012.12	95217851.0	95300673.0	+	vezatin isoform a	55591.0	7.26162	5.5767	0.767968	10.2041	16.0496	1.57286	2.04809	VEZT	CDS	with_protein
FNTA	NC_000008.11:43056322-43085785	OK	23.3826	41.4185	0.7988416316247786	1.7397037231468344	5e-05	0.000226292	yes	8	NC_000008.11	43056323.0	43085785.0	+	farnesyltransferase, CAAX box, alpha	2339.0	23.3073	20.1625	0.865075	23.3826	41.4185	1.77134	2.04761	FNTA	gene	protein_coding
NDUFAF2	NC_000005.10:60945204-61153026	OK	52.8961	88.1468	0.7260021307693574	1.6540491798107844	5e-05	0.000226292	yes	5	NC_000005.10	60945256.0	61152955.0	+	NADH dehydrogenase [ubiquinone] 1 alpha subcomplex assembly factor 2	91942.0	40.3126	32.8128	0.813958	52.8961	88.1468	1.66642	2.0473	NDUFAF2	CDS	with_protein
TRMT10C	NC_000003.12:101561867-101566446	OK	13.6858	26.9404	0.9279308170516138	1.9025453158833712	5e-05	0.000226292	yes	3	NC_000003.12	101564782.0	101565993.0	+	tRNA methyltransferase 10 homolog C precursor	54931.0	17.0977	16.448	0.961997	13.6858	26.9404	1.9685	2.04626	TRMT10C	CDS	with_protein
GNAS	NC_000020.11:58818917-58911192	OK	264.8	705.942	1.411250751517013	2.659676448457487	5e-05	0.000226292	yes	20	NC_000020.11	58839681.0	58911192.0	+	GNAS complex locus	2778.0	292.183	381.091	1.30429	264.801	705.942	2.66594	2.04398	GNAS	gene	protein_coding
GSPT1	NC_000016.10:11851608-11916654	OK	22.4081	51.366	1.16162257026689	2.2370888709463825	5e-05	0.000226292	yes	16	NC_000016.10	11873119.0	11915720.0	-	eukaryotic peptide chain release factor GTP-binding subunit ERF3A isoform 1	2935.0	29.7636	33.4241	1.12298	22.4081	51.3659	2.29229	2.04125	GSPT1	CDS	with_protein
NDEL1	NC_000017.11:8435883-8472744	OK	9.34229	19.5713	0.9920773036498338	1.9890469132078101	5e-05	0.000226292	yes	17	NC_000017.11	8444272.0	8466937.0	+	nuclear distribution protein nudE-like 1 isoform A	81565.0	8.25574	8.47865	1.027	9.3423	19.5714	2.09492	2.03984	NDEL1	CDS	with_protein
TNRC6B	NC_000022.11:40044833-40335808	OK	2.12807	4.89966	0.9153590160616092	1.8860383559191451	5e-05	0.000226292	yes	22	NC_000022.11	40044834.0	40335808.0	+	trinucleotide repeat containing adaptor 6B	23112.0	8.49062	9.58459	1.12884	2.12807	4.89965	2.30239	2.0396	TNRC6B	gene	protein_coding
ELOVL6	NC_000004.12:110045845-110199199	OK	2.73027	4.72982	0.6192097602979216	1.5360335847003033	5e-05	0.000226292	yes	4	NC_000004.12	110051338.0	110198335.0	-	elongation of very long chain fatty acids protein 6	79071.0	3.27498	2.78773	0.85122	2.73027	4.72982	1.73236	2.03515	ELOVL6	CDS	with_protein
CLPP	NC_000019.10:6361530-6370242	OK	31.8967	74.6779	1.201929186932647	2.3004708678986043	5e-05	0.000226292	yes	19	NC_000019.10	6361575.0	6368710.0	+	ATP-dependent Clp protease proteolytic subunit, mitochondrial precursor	8192.0	23.6177	27.2032	1.15181	31.8967	74.6779	2.34124	2.03266	CLPP	CDS	with_protein
IFT20	NC_000017.11:28319040-28335472	OK	23.7866	52.7441	1.1165459958336381	2.1682723729757205	5e-05	0.000226292	yes	17	NC_000017.11	28328326.0	28335472.0	-	intraflagellar transport 20	90410.0	12.5938	13.74	1.09102	23.7866	52.7441	2.21739	2.03241	IFT20	gene	protein_coding
CCDC138	NC_000002.12:108786732-108885485	OK	9.02901	14.4096	0.6196502137735491	1.5365026059401676	5e-05	0.000226292	yes	2	NC_000002.12	108786733.0	108885485.0	+	coiled-coil domain containing 138	165055.0	13.1012	10.3001	0.786196	9.02901	14.4096	1.59593	2.02993	CCDC138	gene	protein_coding
CSPP1	NC_000008.11:67062416-67343824	OK	5.65195	9.65148	0.6792046740927042	1.601256774329332	5e-05	0.000226292	yes	8	NC_000008.11	67062417.0	67198003.0	+	centrosome and spindle pole associated protein 1	79848.0	4.73233	3.98264	0.841582	5.65195	9.65147	1.70764	2.02908	CSPP1	gene	protein_coding
FOXF2	NC_000006.12:1389575-1395603	OK	9.95501	28.4881	1.4285420672988791	2.6917456031532603	5e-05	0.000226292	yes	6	NC_000006.12	1389576.0	1395603.0	+	forkhead box F2	2295.0	7.91375	11.162	1.41045	9.95504	28.4881	2.86168	2.02891	FOXF2	gene	protein_coding
ITGB1	NC_000010.11:32900317-32958230	OK	11.4531	21.9036	0.8790694568682973	1.8391886357613771	5e-05	0.000226292	yes	10	NC_000010.11	32901570.0	32935558.0	-	integrin beta-1 isoform 1A precursor	3688.0	16.4158	15.4818	0.943106	11.4531	21.9036	1.91246	2.02784	ITGB1	CDS	with_protein
TNRC6A	NC_000016.10:24610204-24826223	OK	0.290493	0.486785	0.2042737223380976	1.1521062105722386	5e-05	0.000226292	yes	16	NC_000016.10	24610205.0	24826223.0	+	trinucleotide repeat containing adaptor 6A	27327.0	0.489602	0.405156	0.827522	0.290493	0.486785	1.67572	2.02499	TNRC6A	gene	protein_coding
C9orf85	NC_000009.12:71911638-71986058	OK	17.0866	32.9337	0.9077975153606221	1.876179049683191	5e-05	0.000226292	yes	9	NC_000009.12	71911639.0	71986058.0	+	chromosome 9 open reading frame 85	138241.0	7.17582	6.85573	0.955394	17.0866	32.9337	1.92746	2.01745	C9orf85	gene	protein_coding
CRYBB2P1	NC_000022.11:25448086-25461678	OK	30.6091	52.9079	0.7701567517623653	1.705455074646226	5e-05	0.000226292	yes	22	NC_000022.11	25448087.0	25461678.0	+	crystallin beta B2 pseudogene 1	1416.0	15.5086	13.3146	0.858526	30.6091	52.9079	1.72851	2.01334	CRYBB2P1	gene	transcribed_pseudogene
QSER1	NC_000011.10:32892810-33015362	OK	7.34356	16.5359	1.0715764922954891	2.1017287584676096	5e-05	0.000226292	yes	11	NC_000011.10	32892811.0	32980270.0	+	glutamine and serine rich 1	79832.0	16.134	18.0721	1.12013	7.34356	16.5359	2.25175	2.01026	QSER1	gene	protein_coding
SLC30A9	NC_000004.12:41990501-42090461	OK	19.3493	35.6637	0.849373218285181	1.8017179952135942	5e-05	0.000226292	yes	4	NC_000004.12	41990502.0	42090461.0	+	solute carrier family 30 member 9	10463.0	26.5952	24.4045	0.917629	19.3493	35.6637	1.84315	2.0086	SLC30A9	gene	protein_coding
ATXN7L1	NC_000007.14:105604771-106036432	OK	2.54752	3.83402	0.44641262419026484	1.3626477088219378	0.0002	0.000805209	yes	7	NC_000007.14	105604772.0	105877772.0	-	ataxin 7 like 1	222255.0	2.54125	1.90734	0.750554	2.54752	3.83402	1.505	2.00519	ATXN7L1	gene	protein_coding
SUSD1	NC_000009.12:112040782-112175515	OK	2.78438	4.01878	0.40727974550873425	1.3261828886105518	0.001	0.00340787	yes	9	NC_000009.12	112040783.0	112175515.0	-	sushi domain containing 1	64420.0	3.1185	2.24504	0.719911	2.78438	4.01878	1.44333	2.00487	SUSD1	gene	protein_coding
ZDHHC16	NC_000010.11:97446142-97457370	OK	33.1655	67.7002	1.0077740587244817	2.010806222651505	5e-05	0.000226292	yes	10	NC_000010.11	97451676.0	97456891.0	+	palmitoyltransferase ZDHHC16 isoform 1 precursor	84287.0	22.1414	22.5566	1.01875	33.1655	67.7002	2.04128	2.00371	ZDHHC16	CDS	with_protein
PLA2G12A	NC_000004.12:109709988-109730070	OK	7.89576	16.1933	0.9506567043783023	1.9327522325242597	5e-05	0.000226292	yes	4	NC_000004.12	109714377.0	109729809.0	-	group XIIA secretory phospholipase A2 precursor	81579.0	5.20823	5.33284	1.02393	7.89576	16.1933	2.05089	2.00297	PLA2G12A	CDS	with_protein
ANKIB1	NC_000007.14:92198968-92401383	OK	4.34376	8.84814	0.8819960564876106	1.8429233348803093	5e-05	0.000226292	yes	7	NC_000007.14	92245974.0	92401383.0	+	ankyrin repeat and IBR domain containing 1	54467.0	5.18496	5.27363	1.0171	4.34376	8.84813	2.03697	2.00272	ANKIB1	gene	protein_coding
ZNF800	NC_000007.14:127342870-127392798	OK	2.90356	5.43737	0.7216809479423307	1.649102357847708	5e-05	0.000226292	yes	7	NC_000007.14	127342871.0	127392798.0	-	zinc finger protein 800	168850.0	4.50334	4.22013	0.937113	2.90356	5.43736	1.87265	1.99832	ZNF800	gene	protein_coding
DNAJB12	NC_000010.11:72332862-72354919	OK	16.246	30.83	0.8841253718565332	1.8456453670416337	5e-05	0.000226292	yes	10	NC_000010.11	72332863.0	72354919.0	-	DnaJ heat shock protein family (Hsp40) member B12	54788.0	12.6777	12.0533	0.950746	16.246	30.83	1.89769	1.99601	DNAJB12	gene	protein_coding
RABEP1	NC_000017.11:5282271-5419662	OK	25.9582	48.4774	0.8760455188364986	1.8353376709127456	5e-05	0.000226292	yes	17	NC_000017.11	5282487.0	5383223.0	+	rab GTPase-binding effector protein 1 isoform 1	9135.0	29.3511	27.5228	0.93771	25.9582	48.4774	1.86752	1.99157	RABEP1	CDS	with_protein
DNAJA2	NC_000016.10:46955361-46973674	OK	18.1597	34.7756	0.9009009911658268	1.8672317416243462	5e-05	0.000226292	yes	16	NC_000016.10	46955362.0	46973674.0	-	DnaJ heat shock protein family (Hsp40) member A2	10294.0	23.8482	22.9312	0.961546	18.1597	34.7756	1.91498	1.99157	DNAJA2	gene	protein_coding
ZC3H13	NC_000013.11:45954464-46052794	OK	4.83211	11.725	1.1255758204538848	2.1818861441227955	5e-05	0.000226292	yes	13	NC_000013.11	45957127.0	46045507.0	-	zinc finger CCCH domain-containing protein 13 isoform 1	23091.0	8.16388	9.95124	1.21893	4.83211	11.725	2.42647	1.99065	ZC3H13	CDS	with_protein
CCNC	NC_000006.12:99398049-99579288	OK	16.5408	25.9842	0.6214003687432994	1.5383676913253672	0.0022	0.00684726	yes	6	NC_000006.12	99542387.0	99568814.0	-	cyclin C	892.0	21.607	17.0563	0.789388	16.5408	25.9842	1.57092	1.99004	CCNC	gene	protein_coding
UBN2	NC_000007.14:139228407-139329421	OK	3.49402	6.60924	0.7597458215663608	1.6931922866386886	5e-05	0.000226292	yes	7	NC_000007.14	139228408.0	139329421.0	+	ubinuclein 2	254048.0	6.2409	5.98786	0.959456	3.49402	6.60924	1.89159	1.97152	UBN2	gene	protein_coding
GLUL	NC_000001.11:182378097-182391790	OK	46.4396	100.252	1.093786654826756	2.1343350281199682	5e-05	0.000226292	yes	1	NC_000001.11	182378098.0	182391790.0	-	glutamate-ammonia ligase	2752.0	77.8145	85.4563	1.09821	46.4396	100.252	2.15877	1.96572	GLUL	gene	protein_coding
NCOR2	NC_000012.12:124324414-124567612	OK	3.93061	14.9543	1.6941072627220342	3.2357659599927797	5e-05	0.000226292	yes	12	NC_000012.12	124324415.0	124567612.0	-	nuclear receptor corepressor 2	9612.0	9.66518	18.7364	1.93855	3.93061	14.9543	3.80458	1.96259	NCOR2	gene	protein_coding
RBBP8	NC_000018.10:22914120-23026486	OK	18.444	31.4913	0.7407284288367757	1.6710193375848592	5e-05	0.000226292	yes	18	NC_000018.10	22936852.0	23026240.0	+	DNA endonuclease RBBP8 isoform a	5932.0	15.4225	13.42	0.870155	18.4441	31.4913	1.7074	1.96217	RBBP8	CDS	with_protein
HSD17B12	NC_000011.10:43576475-43856617	OK	10.4623	15.2059	0.4996225822572211	1.4138436439458044	5e-05	0.000226292	yes	11	NC_000011.10	43576476.0	43856617.0	+	hydroxysteroid 17-beta dehydrogenase 12	51144.0	14.9873	11.102	0.740757	10.4623	15.2059	1.4534	1.96205	HSD17B12	gene	protein_coding
HOXC4	NC_000012.12:54016887-54056030	OK	8.44138	20.5571	1.1910934587717796	2.2832573204340894	5e-05	0.000226292	yes	12	NC_000012.12	54016888.0	54056030.0	+	homeobox C4	3221.0	5.86233	7.28042	1.2419	8.44138	20.5571	2.43527	1.96093	HOXC4	gene	protein_coding
SLC35G1	NC_000010.11:93893950-93914271	OK	6.34995	11.4131	0.7560571128165603	1.6888686317593993	5e-05	0.000226292	yes	10	NC_000010.11	93893951.0	93914271.0	+	solute carrier family 35 member G1	159371.0	4.82896	4.43247	0.917893	6.34995	11.4131	1.79735	1.95812	SLC35G1	gene	protein_coding
TET2	NC_000004.12:105145874-105352881	OK	3.2869	6.30425	0.7688013808098453	1.7038536005038605	5e-05	0.000226292	yes	4	NC_000004.12	105233943.0	105276519.0	+	methylcytosine dioxygenase TET2 isoform a	54790.0	5.13228	5.02743	0.97957	3.2869	6.30425	1.91799	1.95799	TET2	CDS	with_protein
GOLGB1	NC_000003.12:121663200-121751169	OK	2.72382	6.41818	0.9942819364766948	1.9920887690597289	5e-05	0.000226292	yes	3	NC_000003.12	121663201.0	121751169.0	-	golgin B1	2804.0	6.73569	8.11799	1.20522	2.72382	6.41818	2.35632	1.9551	GOLGB1	gene	protein_coding
INVS	NC_000009.12:100099242-100352942	OK	7.44564	10.8577	0.48954554419300544	1.4040025385879578	0.0012	0.00401006	yes	9	NC_000009.12	100099243.0	100302175.0	+	inversin	27130.0	8.61234	6.42401	0.745908	7.44563	10.8577	1.45827	1.95503	INVS	gene	protein_coding
USP16	NC_000021.9:29024650-29054488	OK	13.2538	24.01	0.8111584708506392	1.7546198206793975	5e-05	0.000226292	yes	21	NC_000021.9	29027914.0	29054187.0	+	ubiquitin carboxyl-terminal hydrolase 16 isoform a	10600.0	12.5583	11.6409	0.92695	13.2538	24.0101	1.81156	1.95432	USP16	CDS	with_protein
TRIP12	NC_000002.12:229763836-230013913	OK	11.39	22.9639	0.951686530864877	1.9341323648103308	5e-05	0.000226292	yes	2	NC_000002.12	229767554.0	229880079.0	-	E3 ubiquitin-protein ligase TRIP12 isoform a	9320.0	28.9322	29.8768	1.03265	11.39	22.9639	2.01614	1.95239	TRIP12	CDS	with_protein
FAM117A	NC_000017.11:49710328-49764131	OK	12.432	29.0769	1.1629817419637507	2.2391974389517566	5e-05	0.000226292	yes	17	NC_000017.11	49710329.0	49764131.0	-	family with sequence similarity 117 member A	81558.0	8.81528	10.5651	1.1985	12.432	29.0769	2.33888	1.9515	FAM117A	gene	protein_coding
MGAT5	NC_000002.12:134119921-134454621	OK	6.30362	10.8632	0.6998096070081106	1.6242904203668866	5e-05	0.000226292	yes	2	NC_000002.12	134119922.0	134454621.0	+	alpha-1,6-mannosylglycoprotein 6-beta-N-acetylglucosaminyltransferase	4249.0	8.58116	7.57956	0.88328	6.30362	10.8632	1.72333	1.95106	MGAT5	gene	protein_coding
DAP	NC_000005.10:10679229-10761234	OK	30.1125	59.3917	0.9568559595815103	1.941075130574528	5e-05	0.000226292	yes	5	NC_000005.10	10679230.0	10761234.0	-	death associated protein	1611.0	19.9098	20.1531	1.01222	30.1125	59.3917	1.97233	1.94852	DAP	gene	protein_coding
CHD2	NC_000015.10:92900323-93027996	OK	13.7587	17.9175	0.3581557959643331	1.2817863361949229	0.00885	0.0230462	yes	15	NC_000015.10	92900324.0	93027996.0	+	chromodomain helicase DNA binding protein 2	1106.0	18.6906	12.5526	0.671598	13.7587	17.9176	1.30227	1.93906	CHD2	gene	protein_coding
RPS3	NC_000011.10:75399517-75422302	OK	1173.08	3577.84	1.60796133149457	3.048207958571817	5e-05	0.000226292	yes	11	NC_000011.10	75399548.0	75404865.0	+	40S ribosomal protein S3 isoform 1	6188.0	565.459	890.477	1.57479	1173.08	3577.85	3.04997	1.93675	RPS3	CDS	with_protein
ACP1	NC_000002.12:264946-278283	OK	48.3108	101.489	1.0554935117261506	2.0784290662491793	5e-05	0.000226292	yes	2	NC_000002.12	264947.0	278283.0	+	acid phosphatase 1	52.0	49.2212	53.5572	1.08809	48.3108	101.489	2.10074	1.93067	ACP1	gene	protein_coding
PDE9A	NC_000021.9:42653620-42776896	OK	13.2498	24.5566	0.8427542449450804	1.793470785554885	5e-05	0.000226292	yes	21	NC_000021.9	42653815.0	42775293.0	+	high affinity cGMP-specific 3',5'-cyclic phosphodiesterase 9A isoform a	5152.0	10.4676	10.0543	0.960514	13.2498	24.5566	1.85336	1.92955	PDE9A	CDS	with_protein
ANKRD18B	NC_000009.12:33524250-33575442	OK	1.70506	4.09739	0.9140981433666486	1.884390734401455	5e-05	0.000226292	yes	9	NC_000009.12	33524251.0	33575442.0	+	ankyrin repeat domain 18B	441459.0	3.59184	4.4763	1.24624	1.70505	4.09739	2.40308	1.92826	ANKRD18B	gene	protein_coding
DOCK3	NC_000003.12:50674926-51384198	OK	1.8482	2.80615	0.41828196360192615	1.3363352292676074	5e-05	0.000226292	yes	3	NC_000003.12	50674927.0	51384198.0	+	dedicator of cytokinesis 3	1795.0	2.92865	2.31277	0.789706	1.8482	2.80615	1.51832	1.92264	DOCK3	gene	protein_coding
AGTPBP1	NC_000009.12:85546538-85742029	OK	18.8768	37.4852	0.9532182310713369	1.9361869113740644	5e-05	0.000226292	yes	9	NC_000009.12	85546539.0	85742029.0	-	ATP/GTP binding protein 1	23287.0	24.46	25.3126	1.03486	18.8768	37.4851	1.98578	1.91889	AGTPBP1	gene	protein_coding
TMEM126B	NC_000011.10:85628572-85636540	OK	20.1922	35.2085	0.7727950476798382	1.708576740498863	5e-05	0.000226292	yes	11	NC_000011.10	85628608.0	85636229.0	+	complex I assembly factor TMEM126B, mitochondrial isoform a	55863.0	16.1126	14.6475	0.909073	20.1922	35.2085	1.74367	1.91808	TMEM126B	CDS	with_protein
UFM1	NC_000013.11:38349850-38363619	OK	7.32922	13.5508	0.8048451703052342	1.746958298616197	5e-05	0.000226292	yes	13	NC_000013.11	38349851.0	38363619.0	+	ubiquitin fold modifier 1	51569.0	6.6151	6.3774	0.964067	7.32923	13.5508	1.84887	1.91778	UFM1	gene	protein_coding
RHOQ	NC_000002.12:46511846-46617057	OK	8.63896	19.4938	1.088238116732386	2.126142239411721	5e-05	0.000226292	yes	2	NC_000002.12	46542409.0	46584688.0	+	ras homolog family member Q	23433.0	9.43864	11.1107	1.17715	8.63896	19.4938	2.25649	1.91692	RHOQ	gene	protein_coding
ZNF605	NC_000012.12:132918305-132956306	OK	0.461519	0.915585	0.39031645914733426	1.3106808738032143	5e-05	0.000226292	yes	12	NC_000012.12	132918306.0	132956306.0	-	zinc finger protein 605	100289635.0	0.589426	0.610147	1.03515	0.461519	0.915585	1.98385	1.91648	ZNF605	gene	protein_coding
RAB5A	NC_000003.12:19879471-20012264	OK	10.2946	13.7444	0.38453393703649885	1.3054379969188814	0.0006	0.0021586	yes	3	NC_000003.12	19947097.0	19985175.0	+	RAB5A, member RAS oncogene family	5868.0	13.9482	9.7248	0.697208	10.2946	13.7444	1.3351	1.91493	RAB5A	gene	protein_coding
LYPLAL1	NC_000001.11:219173849-219557324	OK	12.7666	21.8092	0.7284435525865152	1.6568506385018806	5e-05	0.000226292	yes	1	NC_000001.11	219173850.0	219445121.0	+	lysophospholipase like 1	127018.0	12.7654	11.4155	0.894252	12.7666	21.8092	1.7083	1.91031	LYPLAL1	gene	protein_coding
SRGAP2B	NC_000001.11:144887190-145112696	OK	1.55647	2.86225	0.595288455478233	1.5107746228197476	5e-05	0.000226292	yes	1	NC_000001.11	144887191.0	145095380.0	-	SLIT-ROBO Rho GTPase activating protein 2B	647135.0	2.06387	1.98753	0.963014	1.55647	2.86225	1.83894	1.90957	SRGAP2B	gene	protein_coding
CHD6	NC_000020.11:41402082-41618377	OK	4.93038	8.52118	0.683015832825939	1.6054923967772723	5e-05	0.000226292	yes	20	NC_000020.11	41402083.0	41618377.0	-	chromodomain helicase DNA binding protein 6	84181.0	8.64912	7.83644	0.906039	4.93037	8.52118	1.7283	1.90754	CHD6	gene	protein_coding
GPS1	NC_000017.11:82047901-82065815	OK	56.2401	138.506	1.2852290745130652	2.4372074821672207	5e-05	0.000226292	yes	17	NC_000017.11	82052307.0	82057127.0	+	COP9 signalosome complex subunit 1 isoform 1	2873.0	67.6704	87.4878	1.29285	56.2401	138.506	2.46276	1.90491	GPS1	CDS	with_protein
BTBD2	NC_000019.10:1985437-2015714	OK	77.3551	205.126	1.3954274073431732	2.630664755708308	5e-05	0.000226292	yes	19	NC_000019.10	1985438.0	2015714.0	-	BTB domain containing 2	55643.0	45.4224	63.2389	1.39224	77.3551	205.127	2.65175	1.90467	BTBD2	gene	protein_coding
CSNK1G2	NC_000019.10:1941148-1981338	OK	35.1117	82.789	1.2142945178292166	2.3202729309337418	5e-05	0.000226292	yes	19	NC_000019.10	1941149.0	1981338.0	+	casein kinase 1 gamma 2	1455.0	25.4282	31.532	1.24004	35.1117	82.789	2.35788	1.90145	CSNK1G2	gene	protein_coding
EIF3L	NC_000022.11:37830852-37889407	OK	213.104	430.523	1.0111257073722255	2.0154831296939806	5e-05	0.000226292	yes	22	NC_000022.11	37848868.0	37889407.0	+	eukaryotic translation initiation factor 3 subunit L	51386.0	143.032	152.174	1.06392	213.104	430.523	2.02025	1.89888	EIF3L	gene	protein_coding
COIL	NC_000017.11:56938198-56975937	OK	13.1724	19.7366	0.5490952777961153	1.463167847365301	5e-05	0.000226292	yes	17	NC_000017.11	56938199.0	56961050.0	-	coilin	8161.0	17.4871	13.8194	0.790262	13.1724	19.7366	1.49833	1.89599	COIL	gene	protein_coding
FAN1	NC_000015.10:30903851-30991628	OK	0.688732	0.998553	0.2430154402521717	1.183463687547817	0.0009	0.00310445	yes	15	NC_000015.10	30903852.0	30943108.0	+	FANCD2 and FANCI associated nuclease 1	22909.0	0.811237	0.620401	0.76476	0.688732	0.99855	1.44984	1.89581	FAN1	gene	protein_coding
CEP57L1	NC_000006.12:109095162-109354948	OK	5.85554	9.40583	0.6020498289265954	1.5178716775046162	5e-05	0.000226292	yes	6	NC_000006.12	109095163.0	109174418.0	+	centrosomal protein 57 like 1	285753.0	5.12741	4.34703	0.847804	5.85554	9.40582	1.60631	1.89467	CEP57L1	gene	protein_coding
MAPK9	NC_000005.10:180233142-180292083	OK	23.5902	43.9789	0.8711649102406724	1.8291392505957664	5e-05	0.000226292	yes	5	NC_000005.10	180233143.0	180292083.0	-	mitogen-activated protein kinase 9	5601.0	25.403	25.0225	0.985023	23.5902	43.9789	1.86429	1.89263	MAPK9	gene	protein_coding
PCSK6	NC_000015.10:101303932-101489707	OK	15.1508	33.3849	1.090169521957411	2.128990514401763	5e-05	0.000226292	yes	15	NC_000015.10	101303933.0	101489707.0	-	proprotein convertase subtilisin/kexin type 6	5046.0	12.4783	14.5488	1.16593	15.1508	33.3849	2.20351	1.88992	PCSK6	gene	protein_coding
KTN1	NC_000014.9:55580206-55684584	OK	13.8127	28.8809	1.0123889688365284	2.0172487122536746	5e-05	0.000226292	yes	14	NC_000014.9	55580207.0	55684584.0	+	kinectin 1	3895.0	13.4661	14.9036	1.10675	13.8127	28.8809	2.0909	1.88922	KTN1	gene	protein_coding
UCHL5	NC_000001.11:193012253-193091777	OK	23.0131	37.392	0.6769840561255975	1.5987939916129106	0.0002	0.000805209	yes	1	NC_000001.11	193016351.0	193059260.0	-	ubiquitin carboxyl-terminal hydrolase isozyme L5 isoform 1	51377.0	32.0055	27.5443	0.860612	23.0131	37.392	1.62481	1.88797	UCHL5	CDS	with_protein
HIVEP1	NC_000006.12:12002095-12212034	OK	1.24086	2.40898	0.6052876175877271	1.5212820078005767	5e-05	0.000226292	yes	6	NC_000006.12	12002096.0	12212034.0	+	HIVEP zinc finger 1	3096.0	2.67716	2.75356	1.02854	1.24086	2.40898	1.94138	1.88751	HIVEP1	gene	protein_coding
ZNF782	NC_000009.12:96815627-96876698	OK	1.71849	2.8547	0.5038130626101653	1.417956291912054	5e-05	0.000226292	yes	9	NC_000009.12	96815628.0	96876698.0	-	zinc finger protein 782	158431.0	1.75709	1.54685	0.880347	1.71849	2.8547	1.66117	1.88695	ZNF782	gene	protein_coding
DNAJB9	NC_000007.14:108569873-108574850	OK	2.11869	3.28495	0.458338215064092	1.3739582965924797	5e-05	0.000226292	yes	7	NC_000007.14	108569874.0	108574850.0	+	DnaJ heat shock protein family (Hsp40) member B9	4189.0	2.32994	1.91591	0.8223	2.11869	3.28495	1.55046	1.88552	DNAJB9	gene	protein_coding
PLCD3	NC_000017.11:45061316-45132524	OK	24.7289	54.4143	1.1068685424662403	2.1537764925822724	5e-05	0.000226292	yes	17	NC_000017.11	45112616.0	45132410.0	-	1-phosphatidylinositol 4,5-bisphosphate phosphodiesterase delta-3	113026.0	15.2929	17.8622	1.168	24.7289	54.4143	2.20044	1.88393	PLCD3	CDS	with_protein
TPPP	NC_000005.10:612339-700727	OK	1.08392	1.78942	0.42066528099206524	1.3385446658221043	0.012	0.0300183	yes	5	NC_000005.10	659862.0	700727.0	-	tubulin polymerization promoting protein	11076.0	2.05882	1.80637	0.87738	1.08392	1.78942	1.65088	1.88161	TPPP	gene	protein_coding
ZC3H15	NC_000002.12:186486252-186509361	OK	31.9703	58.4328	0.8500923365532085	1.8026162940585917	5e-05	0.000226292	yes	2	NC_000002.12	186486383.0	186508733.0	+	zinc finger CCCH domain-containing protein 15	55854.0	26.6589	25.9286	0.972606	31.9703	58.4328	1.82772	1.8792	ZC3H15	CDS	with_protein
CDYL	NC_000006.12:4706137-4955544	OK	27.5798	63.1442	1.1663230003332652	2.244389393907585	5e-05	0.000226292	yes	6	NC_000006.12	4706138.0	4955544.0	+	chromodomain Y like	9425.0	11.8563	14.4713	1.22056	27.5798	63.1442	2.28951	1.87579	CDYL	gene	protein_coding
PABPC4	NC_000001.11:39560815-39576790	OK	38.0446	89.2436	1.2087015883432555	2.3112952879527526	5e-05	0.000226292	yes	1	NC_000001.11	39560816.0	39576790.0	-	poly(A) binding protein cytoplasmic 4	8761.0	40.2557	50.3966	1.25191	38.0446	89.2437	2.34577	1.87375	PABPC4	gene	protein_coding
PNRC2	NC_000001.11:23959163-23963462	OK	15.0938	32.7744	1.0694251310602594	2.098596975232698	5e-05	0.000226292	yes	1	NC_000001.11	23959164.0	23963462.0	+	proline rich nuclear receptor coactivator 2	55629.0	16.6816	19.3421	1.15949	15.0938	32.7744	2.17138	1.8727	PNRC2	gene	protein_coding
RAB4A	NC_000001.11:229256891-229305894	OK	22.8199	48.9416	1.0680746856979928	2.09663348712631	5e-05	0.000226292	yes	1	NC_000001.11	229271111.0	229305894.0	+	RAB4A, member RAS oncogene family	5867.0	12.666	14.5091	1.14551	22.8199	48.9416	2.14469	1.87225	RAB4A	gene	protein_coding
AFG3L1P	NC_000016.10:89972579-90000787	OK	7.81508	11.8416	0.5427793986528089	1.4567763423587763	5e-05	0.000226292	yes	16	NC_000016.10	89972580.0	90000787.0	+	AFG3 like matrix AAA peptidase subunit 1, pseudogene	172.0	6.27802	5.0812	0.809363	7.81508	11.8416	1.51522	1.87212	AFG3L1P	gene	transcribed_pseudogene
RAP2A	NC_000013.11:97434168-97469128	OK	6.36612	13.2549	0.9524811134152267	1.9351979060889588	5e-05	0.000226292	yes	13	NC_000013.11	97434169.0	97469128.0	+	RAP2A, member of RAS oncogene family	5911.0	9.35404	10.4255	1.11454	6.36612	13.2549	2.0821	1.86812	RAP2A	gene	protein_coding
ZNF407	NC_000018.10:74590474-75065671	OK	0.900906	1.83734	0.5778518475748885	1.4926250956123028	5e-05	0.000226292	yes	18	NC_000018.10	74590475.0	75065671.0	+	zinc finger protein 407	55628.0	1.58216	1.72778	1.09204	0.900906	1.83734	2.03944	1.86755	ZNF407	gene	protein_coding
EIF4G3	NC_000001.11:20806291-21176897	OK	20.2368	33.4421	0.6976067146806066	1.6218121374218342	5e-05	0.000226292	yes	1	NC_000001.11	20806292.0	21176897.0	-	eukaryotic translation initiation factor 4 gamma 3	8672.0	26.6931	23.6973	0.88777	20.2368	33.4421	1.65254	1.86145	EIF4G3	gene	protein_coding
ANO5	NC_000011.10:22192484-22283357	OK	1.39871	2.35256	0.48300440317137316	1.397651237540178	5e-05	0.000226292	yes	11	NC_000011.10	22192485.0	22283357.0	+	anoctamin 5	203859.0	2.29976	2.07875	0.903899	1.39871	2.35256	1.68195	1.86077	ANO5	gene	protein_coding
PLEKHM3	NC_000002.12:207821287-208025675	OK	2.1024	3.7038	0.6004420112380529	1.5161810211449203	5e-05	0.000226292	yes	2	NC_000002.12	207821288.0	208025675.0	-	pleckstrin homology domain containing M3	389072.0	3.60461	3.41933	0.948597	2.1024	3.7038	1.7617	1.85716	PLEKHM3	gene	protein_coding
IGF2BP3	NC_000007.14:23298743-23470674	OK	9.66768	18.0673	0.8378541132644277	1.7873895729905651	5e-05	0.000226292	yes	7	NC_000007.14	23310209.0	23470674.0	-	insulin like growth factor 2 mRNA binding protein 3	10643.0	13.3326	13.4193	1.0065	9.66767	18.0673	1.86884	1.85676	IGF2BP3	gene	protein_coding
ST3GAL3	NC_000001.11:43707464-43931164	OK	7.4711	11.6966	0.5838209864725958	1.4988136133441938	5e-05	0.000226292	yes	1	NC_000001.11	43736263.0	43930221.0	+	CMP-N-acetylneuraminate-beta-1,4-galactoside alpha-2,3-sialyltransferase isoform a	6487.0	5.94598	5.01443	0.843331	7.4711	11.6966	1.56558	1.85643	ST3GAL3	CDS	with_protein
MTMR2	NC_000011.10:95832879-95924110	OK	9.39347	15.6987	0.6840583948829235	1.6066530234849379	5e-05	0.000226292	yes	11	NC_000011.10	95832880.0	95924110.0	-	myotubularin related protein 2	8898.0	11.5504	10.4024	0.900607	9.39347	15.6987	1.67124	1.85568	MTMR2	gene	protein_coding
TKT	NC_000003.12:53224711-53256052	OK	91.5712	227.589	1.3041206520229673	2.4693317143992948	5e-05	0.000226292	yes	3	NC_000003.12	53224712.0	53256052.0	-	transketolase	7086.0	108.33	145.104	1.33946	91.5713	227.589	2.48537	1.8555	TKT	gene	protein_coding
TTC17	NC_000011.10:43358884-43494931	OK	9.28323	13.2904	0.47475280773164075	1.3896800907885947	5e-05	0.000226292	yes	11	NC_000011.10	43358885.0	43494931.0	+	tetratricopeptide repeat domain 17	55761.0	9.69845	7.48327	0.771594	9.28323	13.2904	1.43166	1.85545	TTC17	gene	protein_coding
CDC14B	NC_000009.12:96492742-96619843	OK	10.346	19.2731	0.8373829419167436	1.786805922792174	5e-05	0.000226292	yes	9	NC_000009.12	96492743.0	96619843.0	-	cell division cycle 14B	8555.0	12.2565	12.3174	1.00497	10.346	19.2731	1.86285	1.85364	CDC14B	gene	protein_coding
ZNF37A	NC_000010.11:38094326-38150293	OK	9.19481	20.5445	1.0794847288958231	2.1132811695362634	5e-05	0.000226292	yes	10	NC_000010.11	38094327.0	38150293.0	+	zinc finger protein 37A	7587.0	8.44768	10.2037	1.20787	9.19481	20.5445	2.23435	1.84984	ZNF37A	gene	protein_coding
BATF3	NC_000001.11:212686416-212699943	OK	6.68203	14.6066	1.0225967679549148	2.0315723838620783	5e-05	0.000226292	yes	1	NC_000001.11	212686417.0	212699943.0	-	basic leucine zipper ATF-like transcription factor 3	55509.0	3.88314	4.58872	1.1817	6.68203	14.6066	2.18595	1.84983	BATF3	gene	protein_coding
NEAT1	NC_000011.10:65421121-65445540	OK	6.44311	13.247	0.936680699552253	1.914119232417632	5e-05	0.000226292	yes	11	NC_000011.10	65422798.0	65445540.0	+	nuclear paraspeckle assembly transcript 1	283131.0	7.69275	8.551	1.11157	6.44311	13.247	2.05599	1.84963	NEAT1	gene	lncRNA
RSRC1	NC_000003.12:158110051-158571066	OK	11.7081	24.1063	0.9823010816753812	1.9756139784861626	5e-05	0.000226292	yes	3	NC_000003.12	158110052.0	158545730.0	+	arginine and serine rich coiled-coil 1	51319.0	8.49583	9.45781	1.11323	11.7081	24.1063	2.05894	1.84952	RSRC1	gene	protein_coding
DEPDC1	NC_000001.11:68474151-68538627	OK	13.4651	17.6779	0.36875596165792235	1.2912389129698383	0.0006	0.0021586	yes	1	NC_000001.11	68474152.0	68497082.0	-	DEP domain containing 1	55635.0	17.0333	12.103	0.710547	13.4651	17.6779	1.31287	1.84769	DEPDC1	gene	protein_coding
LINC00115	NC_000001.11:826205-827522	OK	1.26509	2.03061	0.420039833258784	1.3379644958919954	0.00085	0.00295249	yes	1	NC_000001.11	826206.0	827522.0	-	long intergenic non-protein coding RNA 115	79854.0	0.770261	0.670048	0.869897	1.2651	2.03061	1.6051	1.84516	LINC00115	gene	lncRNA
DEAF1	NC_000011.10:644219-727727	OK	54.7613	129.895	1.2310738882552261	2.3474165774470825	5e-05	0.000226292	yes	11	NC_000011.10	644220.0	707083.0	-	DEAF1 transcription factor	10522.0	31.559	40.6476	1.28799	54.7614	129.895	2.37202	1.84165	DEAF1	gene	protein_coding
TMEM181	NC_000006.12:158536431-158635433	OK	4.74372	7.86731	0.6265110917539252	1.5438269971377434	5e-05	0.000226292	yes	6	NC_000006.12	158536432.0	158635433.0	+	transmembrane protein 181	57583.0	9.19933	8.29486	0.901681	4.74372	7.86731	1.65847	1.83931	TMEM181	gene	protein_coding
ANKH	NC_000005.10:14660793-14871778	OK	12.9843	25.8695	0.9421614353841279	1.9214047181482095	5e-05	0.000226292	yes	5	NC_000005.10	14704800.0	14871778.0	-	ANKH inorganic pyrophosphate transport regulator	56172.0	7.64616	8.303	1.0859	12.9843	25.8695	1.99236	1.83475	ANKH	gene	protein_coding
NT5C3B	NC_000017.11:41825056-41848384	OK	195.216	414.001	1.0806721250970055	2.1150212011252907	5e-05	0.000226292	yes	17	NC_000017.11	41825057.0	41836276.0	-	5'-nucleotidase, cytosolic IIIB	115024.0	91.1317	105.356	1.15608	195.216	414.001	2.12073	1.83442	NT5C3B	gene	protein_coding
PACS2	NC_000014.9:105209285-105398147	OK	7.48166	21.3532	1.3980628203643146	2.6354746594416656	5e-05	0.000226292	yes	14	NC_000014.9	105300718.0	105398147.0	+	phosphofurin acidic cluster sorting protein 2	23241.0	6.88158	10.718	1.55749	7.48166	21.3532	2.85407	1.83248	PACS2	gene	protein_coding
LMO4	NC_000001.11:87328879-87348923	OK	5.13916	11.6902	1.0476016312644831	2.0670906117449297	5e-05	0.000226292	yes	1	NC_000001.11	87328880.0	87348923.0	+	LIM domain only 4	8543.0	4.55085	5.65309	1.2422	5.13916	11.6901	2.27472	1.83119	LMO4	gene	protein_coding
RMDN1	NC_000008.11:86333273-86514357	OK	13.579	27.1859	0.9510818687124236	1.9333219013649765	5e-05	0.000226292	yes	8	NC_000008.11	86467055.0	86514357.0	-	regulator of microtubule dynamics 1	51115.0	12.7661	13.9991	1.09658	13.579	27.186	2.00206	1.82573	RMDN1	gene	protein_coding
BMP7	NC_000020.11:57168752-57267901	OK	8.79017	17.9173	0.9503003759282116	1.932274924745944	5e-05	0.000226292	yes	20	NC_000020.11	57168753.0	57266641.0	-	bone morphogenetic protein 7	655.0	7.00071	7.82243	1.11738	8.79018	17.9173	2.03833	1.82421	BMP7	gene	protein_coding
RPN1	NC_000003.12:128619968-128650818	OK	66.3411	107.511	0.6882821067365334	1.611363639738584	5e-05	0.000226292	yes	3	NC_000003.12	128620411.0	128650800.0	-	dolichyl-diphosphooligosaccharide--protein glycosyltransferase subunit 1 precursor	6184.0	64.0745	56.9341	0.888561	66.3411	107.511	1.62058	1.82383	RPN1	CDS	with_protein
CCZ1	NC_000007.14:5898732-5970850	OK	4.25424	6.48533	0.510583820145988	1.4246265872895034	5e-05	0.000226292	yes	7	NC_000007.14	5898733.0	5926550.0	+	CCZ1 homolog, vacuolar protein trafficking and biogenesis associated	51622.0	4.18383	3.50245	0.83714	4.25424	6.48533	1.52444	1.82101	CCZ1	gene	protein_coding
KMT2C	NC_000007.14:152134924-152436642	OK	4.32669	7.60732	0.6923247837390711	1.6158852871107576	5e-05	0.000226292	yes	7	NC_000007.14	152136832.0	152435786.0	-	histone-lysine N-methyltransferase 2C	58508.0	10.0625	9.72298	0.966264	4.32668	7.60733	1.75824	1.81962	KMT2C	CDS	with_protein
MTA1	NC_000014.9:105419826-105470729	OK	52.2815	118.913	1.1702814692229762	2.250556009121364	5e-05	0.000226292	yes	14	NC_000014.9	105419827.0	105470729.0	+	metastasis associated 1	9112.0	39.2294	49.0456	1.25023	52.2816	118.914	2.27449	1.81926	MTA1	gene	protein_coding
ZNF148	NC_000003.12:125225668-125375354	OK	4.11295	7.39372	0.715154420363342	1.641658924886807	5e-05	0.000226292	yes	3	NC_000003.12	125225669.0	125375354.0	-	zinc finger protein 148	7707.0	5.44061	5.37797	0.988487	4.11295	7.39372	1.79767	1.81861	ZNF148	gene	protein_coding
FRA10AC1	NC_000010.11:93667882-93702959	OK	4.9573	9.87978	0.8689188663368252	1.8262937908112735	5e-05	0.000226292	yes	10	NC_000010.11	93667883.0	93702959.0	-	FRA10A associated CGG repeat 1	118924.0	4.52625	4.96065	1.09597	4.9573	9.87977	1.99297	1.81845	FRA10AC1	gene	protein_coding
RPL3	NC_000022.11:39312881-39319623	OK	2543.84	7852.53	1.625766307928087	3.086060420301472	5e-05	0.000226292	yes	22	NC_000022.11	39312940.0	39319597.0	-	60S ribosomal protein L3 isoform a	6122.0	1170.88	1988.01	1.69788	2543.84	7852.53	3.08688	1.81808	RPL3	CDS	with_protein
ZNF655	NC_000007.14:99546294-99611045	OK	16.0432	28.9303	0.8124105006817626	1.7561432125422451	5e-05	0.000226292	yes	7	NC_000007.14	99558544.0	99576453.0	+	zinc finger protein 655	79027.0	16.7478	16.6147	0.992053	16.0432	28.9303	1.80327	1.81772	ZNF655	gene	protein_coding
GGPS1	NC_000001.11:235166894-235344532	OK	23.8107	41.7493	0.7849383572545516	1.7230186975780604	5e-05	0.000226292	yes	1	NC_000001.11	235327216.0	235344532.0	+	geranylgeranyl diphosphate synthase 1	9453.0	17.0217	16.4523	0.966551	23.8107	41.7493	1.75338	1.81406	GGPS1	gene	protein_coding
DYNC1LI1	NC_000003.12:32525973-32570858	OK	10.8885	21.0858	0.8935523928164852	1.8577448795054041	5e-05	0.000226292	yes	3	NC_000003.12	32526799.0	32570770.0	-	cytoplasmic dynein 1 light intermediate chain 1 isoform 1	51143.0	17.4232	18.6048	1.06782	10.8885	21.0858	1.93653	1.81354	DYNC1LI1	CDS	with_protein
STAG3L4	NC_000007.14:67302637-67321526	OK	5.81437	11.8439	0.9144311489706456	1.8848257432455238	5e-05	0.000226292	yes	7	NC_000007.14	67302638.0	67321526.0	+	stromal antigen 3-like 4 (pseudogene)	64940.0	3.35552	3.77008	1.12354	5.81437	11.8439	2.037	1.81302	STAG3L4	gene	transcribed_pseudogene
SPEN	NC_000001.11:15834214-15976132	OK	9.20161	24.3212	1.311548923580582	2.4820788091291477	5e-05	0.000226292	yes	1	NC_000001.11	15848068.0	15939427.0	+	msx2-interacting protein	23013.0	28.3195	41.3426	1.45986	9.20161	24.3212	2.64315	1.81055	SPEN	CDS	with_protein
INSIG1	NC_000007.14:155297877-155310235	OK	14.3821	26.4585	0.8360003394255169	1.7850943629283393	5e-05	0.000226292	yes	7	NC_000007.14	155297878.0	155310235.0	+	insulin induced gene 1	3638.0	14.6377	14.8747	1.01619	14.3821	26.4585	1.83968	1.81037	INSIG1	gene	protein_coding
HDLBP	NC_000002.12:241188550-241354027	OK	84.1532	193.752	1.193505492533026	2.287077878459059	5e-05	0.000226292	yes	2	NC_000002.12	241227291.0	241315815.0	-	high density lipoprotein binding protein	3069.0	113.582	144.557	1.27271	84.1532	193.752	2.30238	1.80903	HDLBP	gene	protein_coding
CDK13	NC_000007.14:39949663-40099580	OK	5.10588	12.4457	1.1388737242977687	2.2020904439654894	5e-05	0.000226292	yes	7	NC_000007.14	39949664.0	40099580.0	+	cyclin dependent kinase 13	8621.0	8.81529	11.882	1.34788	5.10588	12.4457	2.43752	1.80841	CDK13	gene	protein_coding
SECISBP2	NC_000009.12:89318499-89498113	OK	17.6068	29.3793	0.7072586657955302	1.6326987982887982	5e-05	0.000226292	yes	9	NC_000009.12	89318500.0	89367117.0	+	SECIS binding protein 2	79048.0	15.8236	14.6363	0.924965	17.6068	29.3793	1.66863	1.804	SECISBP2	gene	protein_coding
STARD3NL	NC_000007.14:38178244-38230671	OK	24.3132	40.3641	0.7084892932535389	1.6340920942433197	5e-05	0.000226292	yes	7	NC_000007.14	38178245.0	38230671.0	+	STARD3 N-terminal like	83930.0	14.2005	13.0748	0.920726	24.3132	40.3641	1.66018	1.80312	STARD3NL	gene	protein_coding
TTC14	NC_000003.12:180602162-180679489	OK	3.39271	5.04432	0.46046878401691327	1.3759888542608092	5e-05	0.000226292	yes	3	NC_000003.12	180602163.0	180618329.0	+	tetratricopeptide repeat domain 14	151613.0	3.56285	2.9394	0.825013	3.39271	5.04432	1.48681	1.80217	TTC14	gene	protein_coding
LYAR	NC_000004.12:4267700-4290195	OK	26.9693	55.4238	1.0124596837506736	2.0173475918238926	5e-05	0.000226292	yes	4	NC_000004.12	4267889.0	4283742.0	-	cell growth-regulating nucleolar protein	55646.0	20.1468	22.9743	1.14034	26.9693	55.4238	2.05507	1.80215	LYAR	CDS	with_protein
LARP4	NC_000012.12:50400861-50480004	OK	13.3844	21.8678	0.6688125328942989	1.5897639109034787	0.0009	0.00310445	yes	12	NC_000012.12	50400862.0	50480004.0	+	La ribonucleoprotein 4	113251.0	21.1168	19.1646	0.907552	13.3844	21.8678	1.63383	1.80026	LARP4	gene	protein_coding
PTDSS1	NC_000008.11:96261901-96336995	OK	18.203	25.3271	0.4552168990073877	1.3709889079831277	5e-05	0.000226292	yes	8	NC_000008.11	96261902.0	96336995.0	+	phosphatidylserine synthase 1	9791.0	15.4213	11.924	0.773215	18.203	25.3271	1.39137	1.79946	PTDSS1	gene	protein_coding
SENP6	NC_000006.12:75601863-75718281	OK	8.77762	15.0623	0.7161232484086626	1.6427617354734587	5e-05	0.000226292	yes	6	NC_000006.12	75602525.0	75715594.0	+	sentrin-specific protease 6 isoform 1	26054.0	11.083	10.5691	0.953629	8.77762	15.0623	1.71599	1.79943	SENP6	CDS	with_protein
TBCEL	NC_000011.10:121024101-121191490	OK	3.40866	5.49154	0.5582205527842112	1.4724519468500636	5e-05	0.000226292	yes	11	NC_000011.10	121024102.0	121090776.0	+	tubulin folding cofactor E like	219899.0	3.90328	3.49526	0.895466	3.40866	5.49154	1.61106	1.79913	TBCEL	gene	protein_coding
C1orf21	NC_000001.11:184387028-184638004	OK	1.47188	3.45818	0.8508461591012915	1.8035584251662704	5e-05	0.000226292	yes	1	NC_000001.11	184387029.0	184629019.0	+	chromosome 1 open reading frame 21	81563.0	1.56765	2.04766	1.3062	1.47188	3.45818	2.3495	1.79874	C1orf21	gene	protein_coding
PHF20L1	NC_000008.11:132705838-132848807	OK	7.79632	13.5329	0.724350623657477	1.652156811030067	5e-05	0.000226292	yes	8	NC_000008.11	132775371.0	132848807.0	+	PHD finger protein 20 like 1	51105.0	11.4985	11.1116	0.966349	7.79632	13.5329	1.73581	1.79626	PHF20L1	gene	protein_coding
ZC3H8	NC_000002.12:112138384-112255042	OK	8.02775	15.7114	0.8883942279342047	1.851114618814212	5e-05	0.000226292	yes	2	NC_000002.12	112230918.0	112254981.0	-	zinc finger CCCH domain-containing protein 8	84524.0	5.14484	5.60866	1.09015	8.02775	15.7114	1.95713	1.79528	ZC3H8	CDS	with_protein
APPL1	NC_000003.12:57227728-57293048	OK	4.17899	8.39752	0.8596093078427951	1.8145468517992895	5e-05	0.000226292	yes	3	NC_000003.12	57227729.0	57273471.0	+	adaptor protein, phosphotyrosine interacting with PH domain and leucine zipper 1	26060.0	9.30111	10.4184	1.12013	4.17899	8.39752	2.00946	1.79396	APPL1	gene	protein_coding
ZNF92	NC_000007.14:65373854-65401136	OK	5.65716	8.79888	0.5577100175731453	1.4719309735683084	5e-05	0.000226292	yes	7	NC_000007.14	65373855.0	65401136.0	+	zinc finger protein 92	168374.0	5.8935	5.11762	0.86835	5.65716	8.79888	1.55535	1.79116	ZNF92	gene	protein_coding
CLPTM1	NC_000019.10:44954584-44993341	OK	18.9503	37.137	0.9347809193439076	1.9116003268121287	5e-05	0.000226292	yes	19	NC_000019.10	44955396.0	44992897.0	+	cleft lip and palate transmembrane protein 1 isoform 2	1209.0	14.4573	15.823	1.09447	18.9503	37.137	1.9597	1.79055	CLPTM1	CDS	with_protein
NAE1	NC_000016.10:66802877-66830977	OK	29.215	57.5998	0.9556307987276762	1.9394274367036235	5e-05	0.000226292	yes	16	NC_000016.10	66802878.0	66830977.0	-	NEDD8 activating enzyme E1 subunit 1	8883.0	33.8824	37.3278	1.10169	29.215	57.5998	1.97158	1.7896	NAE1	gene	protein_coding
RPS6	NC_000009.12:19375714-19380236	OK	4679.76	10312.4	1.1397053220850584	2.2033601380972314	0.001	0.00340787	yes	9	NC_000009.12	19376293.0	19380195.0	-	40S ribosomal protein S6	6194.0	1460.13	1799.39	1.23235	4679.76	10312.5	2.20363	1.78815	RPS6	CDS	with_protein
LCORL	NC_000004.12:17810941-18023287	OK	4.36595	6.57663	0.49772268489116245	1.4119829666694625	0.0161	0.0386471	yes	4	NC_000004.12	17841187.0	18023287.0	-	ligand dependent nuclear receptor corepressor like	254251.0	5.87095	4.95152	0.843394	4.36595	6.57663	1.50634	1.78605	LCORL	gene	protein_coding
NDUFV2	NC_000018.10:9102641-9136720	OK	36.5515	65.4461	0.8233139866211046	1.7694659334513936	5e-05	0.000226292	yes	18	NC_000018.10	9117871.0	9134279.0	+	NADH dehydrogenase [ubiquinone] flavoprotein 2, mitochondrial isoform X1	4729.0	45.3314	45.4582	1.0028	36.5515	65.4461	1.79052	1.78552	NDUFV2	CDS	with_protein
PRKRA	NC_000002.12:178413658-178516463	OK	19.3997	26.4584	0.42869962620777446	1.346019794408741	0.0076	0.0202204	yes	2	NC_000002.12	178432097.0	178451030.0	-	interferon-inducible double-stranded RNA-dependent protein kinase activator A isoform 1	8575.0	19.6804	15.0469	0.764564	19.3997	26.4584	1.36386	1.78383	PRKRA	CDS	with_protein
TMEM168	NC_000007.14:112762376-112790403	OK	1.13379	1.58181	0.27496463580261565	1.2099644294893124	0.0013	0.00430341	yes	7	NC_000007.14	112762377.0	112790403.0	-	transmembrane protein 168	64418.0	1.95633	1.53019	0.782175	1.13379	1.58181	1.39516	1.78369	TMEM168	gene	protein_coding
TTC23	NC_000015.10:99069457-99251226	OK	7.96858	11.885	0.5227410515255979	1.4366822841520064	5e-05	0.000226292	yes	15	NC_000015.10	99136323.0	99251226.0	-	tetratricopeptide repeat domain 23	64927.0	7.58879	6.35173	0.836989	7.96858	11.885	1.49148	1.78196	TTC23	gene	protein_coding
RNF13	NC_000003.12:149812687-149962139	OK	9.26662	12.049	0.345977958735745	1.2710122708349973	0.00225	0.00698565	yes	3	NC_000003.12	149846027.0	149961104.0	+	E3 ubiquitin-protein ligase RNF13 isoform 1 precursor	11342.0	9.53903	6.96275	0.729923	9.26664	12.049	1.30026	1.78137	RNF13	CDS	with_protein
MYCBP2	NC_000013.11:77044656-77329787	OK	5.44324	8.37341	0.5407876549087565	1.4547665460234291	5e-05	0.000226292	yes	13	NC_000013.11	77045378.0	77326775.0	-	E3 ubiquitin-protein ligase MYCBP2	23077.0	19.9173	17.2153	0.864339	5.44324	8.37341	1.53831	1.77976	MYCBP2	CDS	with_protein
MKI67	NC_000010.11:128096658-128126423	OK	8.87144	15.6836	0.7570981693922265	1.690087768349906	5e-05	0.000226292	yes	10	NC_000010.11	128096659.0	128126423.0	-	marker of proliferation Ki-67	4288.0	28.395	28.2115	0.993538	8.87144	15.6836	1.76787	1.77937	MKI67	gene	protein_coding
EPHA7	NC_000006.12:93240019-93419584	OK	2.06217	3.55116	0.5716799284127794	1.4862532125910708	5e-05	0.000226292	yes	6	NC_000006.12	93240020.0	93419584.0	-	EPH receptor A7	2045.0	3.69606	3.5862	0.970276	2.06217	3.55116	1.72205	1.7748	EPHA7	gene	protein_coding
ZRANB1	NC_000010.11:124939488-125161039	OK	6.16419	9.84937	0.5987357664877515	1.5143889260335082	0.00285	0.00857775	yes	10	NC_000010.11	124942494.0	124984992.0	+	ubiquitin thioesterase ZRANB1	54764.0	7.38045	6.64943	0.900951	6.16419	9.84939	1.59784	1.7735	ZRANB1	CDS	with_protein
AURKA	NC_000020.11:56369389-56392308	OK	25.7223	36.1669	0.47597417501499706	1.390857074428473	5e-05	0.000226292	yes	20	NC_000020.11	56369390.0	56392308.0	-	aurora kinase A	6790.0	31.4658	24.9535	0.793036	25.7224	36.1668	1.40605	1.77299	AURKA	gene	protein_coding
FGFRL1	NC_000004.12:1009929-1026898	OK	10.9668	20.2369	0.8275357701049302	1.7746515359160349	5e-05	0.000226292	yes	4	NC_000004.12	1009930.0	1026898.0	+	fibroblast growth factor receptor like 1	53834.0	9.95281	10.3805	1.04297	10.9667	20.2369	1.8453	1.76928	FGFRL1	gene	protein_coding
PRKAG2	NC_000007.14:151556123-151879223	OK	3.34086	5.66694	0.6190438494388371	1.5358569500052985	5e-05	0.000226292	yes	7	NC_000007.14	151557201.0	151876620.0	-	5'-AMP-activated protein kinase subunit gamma-2 isoform a	51422.0	3.17841	3.04959	0.959469	3.34086	5.66694	1.69625	1.76791	PRKAG2	CDS	with_protein
TANC2	NC_000017.11:62966234-63427706	OK	3.58147	5.99142	0.6097749330785613	1.526021124224321	5e-05	0.000226292	yes	17	NC_000017.11	63009560.0	63421955.0	+	protein TANC2	26115.0	8.52502	8.07437	0.947138	3.58147	5.99142	1.67289	1.76626	TANC2	CDS	with_protein
MLLT3	NC_000009.12:20341668-20622499	OK	6.05045	11.7626	0.8561350186287378	1.8101823287875245	5e-05	0.000226292	yes	9	NC_000009.12	20341669.0	20622499.0	-	MLLT3 super elongation complex subunit	4300.0	4.91794	5.41654	1.10139	6.05045	11.7626	1.94409	1.76513	MLLT3	gene	protein_coding
MAP3K2	NC_000002.12:127298667-127406167	OK	2.19857	3.50068	0.49271593555075266	1.4070912939219715	5e-05	0.000226292	yes	2	NC_000002.12	127298668.0	127388465.0	-	mitogen-activated protein kinase kinase kinase 2	10746.0	4.75719	4.29152	0.902112	2.19857	3.50068	1.59225	1.76502	MAP3K2	gene	protein_coding
HNRNPA3P6	NC_000003.12:75214458-75215759	OK	0.633069	1.06662	0.33968738886858363	1.2654823525521581	0.0061	0.0167412	yes	3	NC_000003.12	75214459.0	75215759.0	+	heterogeneous nuclear ribonucleoprotein A3 pseudogene 6	653115.0	1.34754	1.28756	0.955489	0.633069	1.06662	1.68485	1.76333	HNRNPA3P6	gene	pseudogene
PPP2R5C	NC_000014.9:101760572-101927992	OK	51.339	89.283	0.7865679982063378	1.7249660864747127	5e-05	0.000226292	yes	14	NC_000014.9	101760573.0	101927992.0	+	protein phosphatase 2 regulatory subunit B'gamma	5527.0	42.7566	42.1858	0.986652	51.339	89.283	1.73909	1.76261	PPP2R5C	gene	protein_coding
TFAP2A	NC_000006.12:10396676-10419897	OK	2.02579	4.91924	0.9681000899725294	1.9562626619824905	5e-05	0.000226292	yes	6	NC_000006.12	10396677.0	10419897.0	-	transcription factor AP-2 alpha	7020.0	2.40376	3.31353	1.37848	2.02579	4.91924	2.42831	1.76159	TFAP2A	gene	protein_coding
SREK1IP1	NC_000005.10:64690502-64768839	OK	3.03183	5.58425	0.7075843054202413	1.6330673664316204	5e-05	0.000226292	yes	5	NC_000005.10	64724384.0	64768517.0	-	protein SREK1IP1	285672.0	3.81087	3.98635	1.04605	3.03183	5.58425	1.84187	1.76079	SREK1IP1	CDS	with_protein
RBM12	NC_000020.11:35626043-35664900	OK	8.30818	13.626	0.6519642524217364	1.5713060985069047	5e-05	0.000226292	yes	20	NC_000020.11	35648925.0	35664900.0	-	RNA binding motif protein 12	10137.0	16.1241	15.0311	0.932215	8.30818	13.626	1.64007	1.75933	RBM12	gene	protein_coding
KNSTRN	NC_000015.10:40382720-40394288	OK	26.0007	46.2617	0.8076747138874554	1.7503879529049242	5e-05	0.000226292	yes	15	NC_000015.10	40382721.0	40394288.0	+	kinetochore localized astrin (SPAG5) binding protein	90417.0	22.4296	22.7192	1.01291	26.0007	46.2617	1.77925	1.75657	KNSTRN	gene	protein_coding
ASAP1	NC_000008.11:130052103-130443848	OK	5.32262	10.7188	0.890230427128007	1.8534721365509867	5e-05	0.000226292	yes	8	NC_000008.11	130054731.0	130401943.0	-	arf-GAP with SH3 domain, ANK repeat and PH domain-containing protein 1 isoform 1	50807.0	9.47474	10.8881	1.14917	5.32262	10.7188	2.01381	1.7524	ASAP1	CDS	with_protein
TAF4	NC_000020.11:61974797-62065881	OK	1.00372	2.46993	0.792225638859436	1.731743956241391	5e-05	0.000226292	yes	20	NC_000020.11	61974798.0	62065881.0	-	TATA-box binding protein associated factor 4	6874.0	1.13465	1.59338	1.4043	1.00372	2.46992	2.46076	1.75231	TAF4	gene	protein_coding
RABL6	NC_000009.12:136796337-136841187	OK	55.8202	149.54	1.4056710618256805	2.6494098929606014	5e-05	0.000226292	yes	9	NC_000009.12	136807948.0	136841187.0	+	RAB, member RAS oncogene family like 6	55684.0	48.029	73.4757	1.52982	55.8202	149.54	2.67896	1.75116	RABL6	gene	protein_coding
TASP1	NC_000020.11:13008971-13638932	OK	9.90519	15.9236	0.6340215860747835	1.5518849281855704	5e-05	0.000226292	yes	20	NC_000020.11	13104760.0	13638932.0	-	taspase 1	55617.0	7.28351	6.69619	0.919364	9.90519	15.9236	1.60761	1.74861	TASP1	gene	protein_coding
PTPRA	NC_000020.11:2835313-3038669	OK	15.5212	23.8394	0.5883118462298924	1.5034864295571744	0.00025	0.000985813	yes	20	NC_000020.11	2864184.0	3038669.0	+	protein tyrosine phosphatase receptor type A	5786.0	14.0124	12.3166	0.878979	15.5212	23.8394	1.53592	1.7474	PTPRA	gene	protein_coding
PHF3	NC_000006.12:63635801-65707226	OK	7.83997	13.4414	0.7080972302282276	1.6336480779912144	5e-05	0.000226292	yes	6	NC_000006.12	63635802.0	63726011.0	+	PHD finger protein 3	23469.0	12.1331	11.9365	0.983796	7.83997	13.4414	1.71448	1.74271	PHF3	gene	protein_coding
VIM	NC_000010.11:17214238-17237593	OK	194.454	575.583	1.5606991910386796	2.949967767351907	5e-05	0.000226292	yes	10	NC_000010.11	17228241.0	17237593.0	+	vimentin	7431.0	274.521	466.493	1.6993	194.455	575.583	2.95999	1.74189	VIM	gene	protein_coding
MYO9A	NC_000015.10:71822290-72143692	OK	2.80666	5.24646	0.7145130975479284	1.6409293186152687	5e-05	0.000226292	yes	15	NC_000015.10	71822291.0	72118577.0	-	myosin IXA	4649.0	6.61525	7.10827	1.07453	2.80666	5.24646	1.86929	1.73964	MYO9A	gene	protein_coding
STAMBP	NC_000002.12:73823787-73873656	OK	28.4676	42.4211	0.5592667102556232	1.4735200695000616	5e-05	0.000226292	yes	2	NC_000002.12	73828911.0	73873656.0	+	STAM binding protein	10617.0	23.0713	19.7654	0.856708	28.4676	42.4212	1.49016	1.7394	STAMBP	gene	protein_coding
ZRANB2	NC_000001.11:70812473-71081035	OK	13.391	24.6161	0.8318839995901182	1.780008338544924	5e-05	0.000226292	yes	1	NC_000001.11	71065074.0	71080995.0	-	zinc finger Ran-binding domain-containing protein 2 isoform 1	9406.0	21.0813	22.2993	1.05777	13.391	24.616	1.83826	1.73785	ZRANB2	CDS	with_protein
PKP4	NC_000002.12:158456951-158735002	OK	19.6272	33.6065	0.7464950403097834	1.6777119531492402	5e-05	0.000226292	yes	2	NC_000002.12	158456952.0	158681429.0	+	plakophilin 4	8502.0	22.6758	22.3717	0.986589	19.6272	33.6065	1.71224	1.73551	PKP4	gene	protein_coding
TLK1	NC_000002.12:170990822-171231293	OK	8.94101	16.3874	0.8065778762293703	1.7490576913211036	5e-05	0.000226292	yes	2	NC_000002.12	170993780.0	171160428.0	-	serine/threonine-protein kinase tousled-like 1 isoform 1	9874.0	10.5728	11.1751	1.05696	8.94101	16.3874	1.83284	1.73406	TLK1	CDS	with_protein
MTRF1L	NC_000006.12:152987361-153003439	OK	15.644	24.2767	0.6028059312380334	1.5186673876471999	5e-05	0.000226292	yes	6	NC_000006.12	152987362.0	153003439.0	-	mitochondrial translational release factor 1 like	54516.0	12.983	11.6349	0.896163	15.6441	24.2767	1.55181	1.73162	MTRF1L	gene	protein_coding
MKRN1	NC_000007.14:140453032-140479569	OK	23.2444	43.0273	0.8607468224842245	1.8159781227829928	5e-05	0.000226292	yes	7	NC_000007.14	140454517.0	140479344.0	-	E3 ubiquitin-protein ligase makorin-1 isoform 1	23608.0	25.8499	27.6528	1.06975	23.2444	43.0273	1.85109	1.7304	MKRN1	CDS	with_protein
PCGF3	NC_000004.12:705831-770980	OK	8.79419	14.9443	0.703042671934297	1.6279345203636033	5e-05	0.000226292	yes	4	NC_000004.12	705832.0	770980.0	+	polycomb group ring finger 3	10336.0	6.8465	6.72405	0.982116	8.79419	14.9443	1.69934	1.73028	PCGF3	gene	protein_coding
CCNB1IP1	NC_000014.9:20311369-20333279	OK	121.976	156.62	0.3580738196793476	1.2817135050741608	0.00155	0.00501322	yes	14	NC_000014.9	20311370.0	20333279.0	-	cyclin B1 interacting protein 1	57820.0	81.8431	60.7462	0.742227	121.976	156.62	1.28402	1.72995	CCNB1IP1	gene	protein_coding
DNAJC1	NC_000010.11:21756547-22003763	OK	22.6284	33.2675	0.5363190029196803	1.4502674747337956	5e-05	0.000226292	yes	10	NC_000010.11	21756548.0	22003763.0	-	DnaJ heat shock protein family (Hsp40) member C1	64215.0	12.6744	10.8022	0.852287	22.6284	33.2676	1.47017	1.72497	DNAJC1	gene	protein_coding
KCTD20	NC_000006.12:36354087-36491143	OK	13.0361	23.0473	0.7767327877894132	1.7132465570920699	5e-05	0.000226292	yes	6	NC_000006.12	36470098.0	36487175.0	+	BTB/POZ domain-containing protein KCTD20 isoform a	222658.0	17.8359	18.2839	1.02512	13.0361	23.0473	1.76795	1.72463	KCTD20	CDS	with_protein
ASPH	NC_000008.11:60964832-61714609	OK	12.3638	24.4231	0.9278096611783018	1.9023855490204884	5e-05	0.000226292	yes	8	NC_000008.11	61500556.0	61714609.0	-	aspartate beta-hydroxylase	444.0	11.275	12.9218	1.14605	12.3637	24.4231	1.97538	1.72364	ASPH	gene	protein_coding
LAMTOR1	NC_000011.10:71997943-72112780	OK	59.3607	137.453	1.1977148724277669	2.2937606754063484	5e-05	0.000226292	yes	11	NC_000011.10	72097292.0	72103297.0	-	late endosomal/lysosomal adaptor, MAPK and MTOR activator 1	55004.0	27.2102	36.5855	1.34455	59.3607	137.453	2.31555	1.72217	LAMTOR1	gene	protein_coding
RNF2	NC_000001.11:185045429-185102603	OK	16.599	27.1761	0.6789784793456208	1.6010057389624404	5e-05	0.000226292	yes	1	NC_000001.11	185087554.0	185100301.0	+	E3 ubiquitin-protein ligase RING2	6045.0	14.4583	13.7517	0.951125	16.599	27.1761	1.63721	1.72134	RNF2	CDS	with_protein
NCOR1	NC_000017.11:15999770-16216475	OK	6.70889	13.1763	0.8788859926340038	1.838954765212631	5e-05	0.000226292	yes	17	NC_000017.11	16029157.0	16216475.0	-	nuclear receptor corepressor 1	9611.0	17.1309	19.5532	1.1414	6.70889	13.1763	1.96401	1.7207	NCOR1	gene	protein_coding
CREBBP	NC_000016.10:3725053-3880727	OK	6.87263	14.9298	1.0168105730596602	2.023440705329731	5e-05	0.000226292	yes	16	NC_000016.10	3725054.0	3880727.0	-	CREB binding protein	1387.0	18.9557	23.943	1.2631	6.87262	14.9298	2.17235	1.71986	CREBBP	gene	protein_coding
ZNF252P	NC_000008.11:144973588-145006046	OK	3.66456	6.06623	0.5991997080058935	1.514876001166241	5e-05	0.000226292	yes	8	NC_000008.11	144973589.0	145002899.0	-	zinc finger protein 252, pseudogene	286101.0	4.15462	3.99972	0.962715	3.66456	6.06623	1.65538	1.71949	ZNF252P	gene	transcribed_pseudogene
NAP1L1	NC_000012.12:76036584-76084687	OK	130.355	364.632	1.476921222752006	2.7835407864184845	5e-05	0.000226292	yes	12	NC_000012.12	76036585.0	76084687.0	-	nucleosome assembly protein 1 like 1	4673.0	106.658	173.509	1.62678	130.355	364.632	2.79722	1.71949	NAP1L1	gene	protein_coding
MARK1	NC_000001.11:220528135-220664461	OK	5.64453	9.66949	0.6832521578372832	1.6057554108416998	5e-05	0.000226292	yes	1	NC_000001.11	220528136.0	220664461.0	+	microtubule affinity regulating kinase 1	4139.0	6.07757	6.05546	0.996363	5.64453	9.66949	1.71307	1.71933	MARK1	gene	protein_coding
LOC100134868	NC_000020.11:26009798-26023272	OK	3.51545	8.42904	1.062241122346666	2.088172828843194	5e-05	0.000226292	yes	20	NC_000020.11	26009799.0	26023272.0	+	uncharacterized LOC100134868	100134868.0	2.90246	4.05428	1.39684	3.51545	8.42903	2.39771	1.71652	LOC100134868	gene	lncRNA
STARD9	NC_000015.10:42575605-42720998	OK	0.881744	1.29514	0.28651178709848013	1.2196876939689991	0.00605	0.016616	yes	15	NC_000015.10	42575606.0	42720998.0	+	StAR related lipid transfer domain containing 9	57519.0	2.13844	1.83145	0.856442	0.881744	1.29514	1.46884	1.71505	STARD9	gene	protein_coding
RAD23A	NC_000019.10:12945845-12957223	OK	107.018	227.82	1.0829414147841865	2.1183506452628262	5e-05	0.000226292	yes	19	NC_000019.10	12945846.0	12953642.0	+	RAD23 homolog A, nucleotide excision repair protein	5886.0	62.4757	77.5631	1.24149	107.018	227.82	2.1288	1.71471	RAD23A	gene	protein_coding
DBF4	NC_000007.14:87876492-87909553	OK	7.31675	11.8291	0.6253281939445996	1.5425616977785797	5e-05	0.000226292	yes	7	NC_000007.14	87876493.0	87909553.0	+	DBF4 zinc finger	10926.0	8.05257	7.5997	0.943761	7.31675	11.8291	1.61671	1.71306	DBF4	gene	protein_coding
DYM	NC_000018.10:49023702-49460709	OK	9.47052	17.8653	0.8494019494076168	1.8017538765982963	5e-05	0.000226292	yes	18	NC_000018.10	49036387.0	49460709.0	-	dymeclin	54808.0	12.0879	13.312	1.10126	9.47052	17.8653	1.88641	1.71295	DYM	gene	protein_coding
NBEA	NC_000013.11:34942269-35672736	OK	1.28215	2.39858	0.5745384636909545	1.4892009727669087	5e-05	0.000226292	yes	13	NC_000013.11	34942270.0	35672736.0	+	neurobeachin	26960.0	2.98238	3.26234	1.09387	1.28215	2.39858	1.87075	1.71021	NBEA	gene	protein_coding
PIKFYVE	NC_000002.12:208266177-208358747	OK	3.35137	6.13315	0.7130696162541139	1.6392883160935519	5e-05	0.000226292	yes	2	NC_000002.12	208271520.0	208355305.0	+	1-phosphatidylinositol 3-phosphate 5-kinase isoform 2	200576.0	7.73004	8.27376	1.07034	3.35137	6.13315	1.83004	1.70978	PIKFYVE	CDS	with_protein
GTPBP8	NC_000003.12:112990983-113001969	OK	6.02897	12.2101	0.9102561852251561	1.8793791978056527	5e-05	0.000226292	yes	3	NC_000003.12	112990984.0	113001969.0	+	GTP binding protein 8 (putative)	29083.0	7.24531	8.59782	1.18667	6.02897	12.21	2.02523	1.70664	GTPBP8	gene	protein_coding
SESTD1	NC_000002.12:179101677-179264832	OK	2.08678	4.11195	0.7277710620328306	1.6560785025171862	5e-05	0.000226292	yes	2	NC_000002.12	179101678.0	179264832.0	-	SEC14 and spectrin domain containing 1	91404.0	3.83979	4.43348	1.15462	2.08678	4.11195	1.97047	1.70661	SESTD1	gene	protein_coding
PTPMT1	NC_000011.10:47565598-47578970	OK	31.3379	52.4009	0.723638062519214	1.6513409961685828	5e-05	0.000226292	yes	11	NC_000011.10	47565623.0	47571629.0	+	phosphatidylglycerophosphatase and protein-tyrosine phosphatase 1 isoform 1	114971.0	11.4377	11.2141	0.980448	31.3379	52.4008	1.67213	1.70547	PTPMT1	CDS	with_protein
ZDHHC11	NC_000005.10:795604-863634	OK	1.65743	2.54848	0.4171694851412364	1.3353051632592394	0.0001	0.000428757	yes	5	NC_000005.10	801107.0	850602.0	-	palmitoyltransferase ZDHHC11	79844.0	2.07332	1.86926	0.901577	1.65743	2.54848	1.53761	1.70547	ZDHHC11	CDS	with_protein
ALG6	NC_000001.11:63367626-63438553	OK	3.62754	4.63427	0.28398324013260545	1.2175518742139455	0.00475	0.0135022	yes	1	NC_000001.11	63367627.0	63438553.0	+	ALG6 alpha-1,3-glucosyltransferase	29929.0	5.18181	3.88234	0.749225	3.62754	4.63426	1.27752	1.70513	ALG6	gene	protein_coding
RPL11	NC_000001.11:23691778-23696835	OK	2767.85	5888.09	1.0887578225824157	2.126908283222276	5e-05	0.000226292	yes	1	NC_000001.11	23691824.0	23696373.0	+	60S ribosomal protein L11 isoform 1	6135.0	1312.76	1637.99	1.24775	2767.85	5888.09	2.12732	1.70493	RPL11	CDS	with_protein
DNAJC10	NC_000002.12:182716256-182794464	OK	2.12919	3.0598	0.37561939729379623	1.2973964508387157	5e-05	0.000226292	yes	2	NC_000002.12	182716257.0	182794464.0	+	DnaJ heat shock protein family (Hsp40) member C10	54431.0	2.8118	2.37137	0.843366	2.12919	3.0598	1.43707	1.70397	DNAJC10	gene	protein_coding
MXRA8	NC_000001.11:1352688-1363541	OK	0.521097	1.2045	0.5353393206323056	1.449282984582837	5e-05	0.000226292	yes	1	NC_000001.11	1352689.0	1363541.0	-	matrix remodeling associated 8	54587.0	0.729368	0.989621	1.35682	0.521097	1.2045	2.31148	1.7036	MXRA8	gene	protein_coding
SCOC	NC_000004.12:140257307-140385728	OK	13.4188	22.6392	0.7132301107788832	1.6394706910422507	5e-05	0.000226292	yes	4	NC_000004.12	140257308.0	140385728.0	+	short coiled-coil protein	60592.0	11.2686	11.1689	0.991154	13.4188	22.6392	1.68713	1.70219	SCOC	gene	protein_coding
GAA	NC_000017.11:80101534-80119881	OK	17.2274	36.918	1.056774084142699	2.0802747511987447	5e-05	0.000226292	yes	17	NC_000017.11	80101535.0	80119881.0	+	alpha glucosidase	2548.0	16.8499	21.2291	1.25989	17.2274	36.9179	2.14298	1.70092	GAA	gene	protein_coding
ADAT1	NC_000016.10:75596867-75623281	OK	4.65401	7.74859	0.6297760834079194	1.5473248190222515	5e-05	0.000226292	yes	16	NC_000016.10	75596868.0	75623281.0	-	adenosine deaminase tRNA specific 1	23536.0	6.95019	6.81255	0.980197	4.65401	7.74859	1.66493	1.69857	ADAT1	gene	protein_coding
PPP2R2D	NC_000010.11:131900933-131982013	OK	12.4399	17.5792	0.467165978451213	1.382391238030045	0.00135	0.00444319	yes	10	NC_000010.11	131900934.0	131971535.0	+	protein phosphatase 2 regulatory subunit Bdelta	55844.0	9.37334	7.81094	0.833314	12.4399	17.5792	1.41313	1.6958	PPP2R2D	gene	protein_coding
BLZF1	NC_000001.11:169368194-169462221	OK	9.01555	12.4401	0.4243022240565111	1.3419233092541096	0.0216	0.0498168	yes	1	NC_000001.11	169368195.0	169396575.0	+	basic leucine zipper nuclear factor 1	8548.0	7.41938	6.04321	0.814517	9.01556	12.4401	1.37984	1.69406	BLZF1	gene	protein_coding
HMBOX1	NC_000008.11:28890393-29064945	OK	4.23775	6.78394	0.5715533887171755	1.4861228580974655	0.001	0.00340787	yes	8	NC_000008.11	28890394.0	29064945.0	+	homeobox containing 1	79618.0	6.44923	6.095	0.945074	4.23776	6.78394	1.60083	1.69387	HMBOX1	gene	protein_coding
ZNF652	NC_000017.11:49289205-49380094	OK	3.9306	6.77951	0.6579160710573344	1.577801890236482	5e-05	0.000226292	yes	17	NC_000017.11	49289206.0	49362473.0	-	zinc finger protein 652	22834.0	7.85636	8.00766	1.01926	3.9306	6.77951	1.7248	1.69221	ZNF652	gene	protein_coding
GNPTG	NC_000016.10:1351930-1414749	OK	7.92256	17.9242	1.0847027102722286	2.1209383853961192	5e-05	0.000226292	yes	16	NC_000016.10	1351931.0	1364113.0	+	N-acetylglucosamine-1-phosphate transferase subunit gamma	84572.0	5.28609	7.07323	1.33808	7.92256	17.9242	2.26242	1.69079	GNPTG	gene	protein_coding
M6PR	NC_000012.12:8914508-8949645	OK	13.0204	19.4058	0.5414517620818518	1.4554363641550883	0.00155	0.00501322	yes	12	NC_000012.12	8941818.0	8946404.0	-	cation-dependent mannose-6-phosphate receptor isoform 1 precursor	4074.0	12.0479	10.6247	0.88187	13.0204	19.4058	1.49042	1.69006	M6PR	CDS	with_protein
CNOT3	NC_000019.10:54137688-54159721	OK	3.03191	4.37453	0.41467516178372765	1.3329985044309027	5e-05	0.000226292	yes	19	NC_000019.10	54137689.0	54155690.0	+	CCR4-NOT transcription complex subunit 3	4849.0	2.98979	2.55513	0.854619	3.03191	4.37453	1.44283	1.68827	CNOT3	gene	protein_coding
TPGS2	NC_000018.10:36297712-37232172	OK	91.8501	172.394	0.9010786083888247	1.8674616397828327	5e-05	0.000226292	yes	18	NC_000018.10	36777647.0	36829003.0	-	tubulin polyglutamylase complex subunit 2	25941.0	52.3788	58.3112	1.11326	91.8501	172.394	1.8769	1.68595	TPGS2	gene	protein_coding
RBM17	NC_000010.11:6089033-6117447	OK	23.3988	48.8312	1.0302391225813876	2.042362739151106	5e-05	0.000226292	yes	10	NC_000010.11	6089034.0	6117447.0	+	RNA binding motif protein 17	84991.0	18.3972	22.87	1.24312	23.3988	48.8312	2.08691	1.67877	RBM17	gene	protein_coding
SPATA5	NC_000004.12:122923069-123319433	OK	5.63708	9.84216	0.7080316333794956	1.6335738005267373	5e-05	0.000226292	yes	4	NC_000004.12	122923143.0	123314064.0	+	ATPase family protein 2 homolog isoform 1	166378.0	8.40135	8.74119	1.04045	5.63708	9.84216	1.74597	1.67809	SPATA5	CDS	with_protein
VMP1	NC_000017.11:59707653-59842255	OK	8.95451	11.4064	0.31766233761290463	1.246309461741462	0.00285	0.00857775	yes	17	NC_000017.11	59707654.0	59842255.0	+	vacuole membrane protein 1	81671.0	8.75088	6.64548	0.759407	8.95451	11.4064	1.27381	1.67738	VMP1	gene	protein_coding
UBE2V2	NC_000008.11:47989027-48064708	OK	16.2938	28.562	0.7734889675089276	1.7093987440585647	5e-05	0.000226292	yes	8	NC_000008.11	47997527.0	48064708.0	+	ubiquitin conjugating enzyme E2 V2	7336.0	17.0964	17.8745	1.04551	16.2938	28.562	1.75294	1.67663	UBE2V2	gene	protein_coding
TEX2	NC_000017.11:64147226-64263265	OK	7.24085	10.4427	0.4735624516059307	1.3885339497745983	5e-05	0.000226292	yes	17	NC_000017.11	64147227.0	64263265.0	-	testis expressed 2	55852.0	7.04154	6.06458	0.861257	7.24085	10.4427	1.44219	1.67451	TEX2	gene	protein_coding
APC	NC_000005.10:112707497-112846239	OK	2.54331	3.88908	0.4644653216931063	1.3798058877151589	5e-05	0.000226292	yes	5	NC_000005.10	112707718.0	112844126.0	+	adenomatous polyposis coli protein isoform a	324.0	6.10231	5.57542	0.913658	2.54331	3.88908	1.52914	1.67365	APC	CDS	with_protein
ZNF664	NC_000012.12:123973214-124316024	OK	28.7388	55.1331	0.9165053016996003	1.887537493106648	5e-05	0.000226292	yes	12	NC_000012.12	123973215.0	124015427.0	+	zinc finger protein 664	144348.0	28.3323	32.4905	1.14677	28.7388	55.1331	1.91842	1.67289	ZNF664	gene	protein_coding
PAPOLA	NC_000014.9:96502375-96567116	OK	30.1875	50.1477	0.7137014561443822	1.6400064128256522	5e-05	0.000226292	yes	14	NC_000014.9	96502376.0	96567116.0	+	poly(A) polymerase alpha	10914.0	39.6475	39.3981	0.99371	30.1875	50.1477	1.66121	1.67172	PAPOLA	gene	protein_coding
MRPL19	NC_000002.12:75646782-75752096	OK	2.26601	4.57004	0.7701584797874574	1.7054571174001303	5e-05	0.000226292	yes	2	NC_000002.12	75646808.0	75655285.0	+	39S ribosomal protein L19, mitochondrial	9801.0	4.10907	4.96055	1.20722	2.26601	4.57004	2.01678	1.6706	MRPL19	CDS	with_protein
KAT6A	NC_000008.11:41929478-42104987	OK	4.46267	8.44103	0.7893379912674781	1.7282812251151909	5e-05	0.000226292	yes	8	NC_000008.11	41932205.0	42048977.0	-	histone acetyltransferase KAT6A isoform 1	7994.0	13.8662	15.7224	1.13386	4.46267	8.44103	1.89148	1.66817	KAT6A	CDS	with_protein
GINM1	NC_000006.12:149566374-149591748	OK	9.6655	16.2474	0.6934272948229712	1.6171206225680932	5e-05	0.000226292	yes	6	NC_000006.12	149566375.0	149591748.0	+	glycoprotein integral membrane 1	116254.0	10.2393	10.3205	1.00793	9.66549	16.2474	1.68097	1.66774	GINM1	gene	protein_coding
DNAJC7	NC_000017.11:41966794-42098473	OK	57.194	112.922	0.9691040602765302	1.9576244973708627	5e-05	0.000226292	yes	17	NC_000017.11	41976427.0	42021371.0	-	DnaJ heat shock protein family (Hsp40) member C7	7266.0	62.8059	74.3671	1.18408	57.194	112.922	1.97436	1.66743	DNAJC7	gene	protein_coding
CERS2	NC_000001.11:150965183-150974835	OK	50.1295	95.9417	0.9229614644293491	1.8960032857743576	5e-05	0.000226292	yes	1	NC_000001.11	150965184.0	150974835.0	-	ceramide synthase 2	29956.0	38.6981	44.5309	1.15073	50.1295	95.9418	1.91388	1.66319	CERS2	gene	protein_coding
TTC37	NC_000005.10:95463893-95554980	OK	13.3086	22.682	0.7269084040739271	1.6550885481458708	5e-05	0.000226292	yes	5	NC_000005.10	95463894.0	95554980.0	-	tetratricopeptide repeat domain 37	9652.0	22.172	22.7211	1.02476	13.3086	22.682	1.70431	1.66313	TTC37	gene	protein_coding
SPECC1L	NC_000022.11:24270816-24528681	OK	15.8431	24.1469	0.5782228686325981	1.4930090066555437	5e-05	0.000226292	yes	22	NC_000022.11	24302232.0	24414623.0	+	cytospin-A isoform 1	23384.0	21.2322	19.4998	0.918407	15.8431	24.1469	1.52413	1.65954	SPECC1L	CDS	with_protein
MAP2K4	NC_000017.11:11598469-12143828	OK	8.04632	10.3452	0.32667910677160794	1.2541232235870496	0.01115	0.0281947	yes	17	NC_000017.11	12020887.0	12141260.0	+	dual specificity mitogen-activated protein kinase kinase 4 isoform 1	6416.0	9.84944	7.65067	0.776762	8.04632	10.3452	1.28571	1.65522	MAP2K4	CDS	with_protein
KCTD9	NC_000008.11:25419257-25458468	OK	4.75194	6.39729	0.36294820893187874	1.2860513148607253	0.0005	0.00183568	yes	8	NC_000008.11	25429857.0	25458246.0	-	BTB/POZ domain-containing protein KCTD9	54793.0	7.27263	5.91538	0.813376	4.75194	6.39729	1.34625	1.65513	KCTD9	CDS	with_protein
SNW1	NC_000014.9:77717598-77769742	OK	33.5137	52.8602	0.642050442570115	1.5605455225026579	5e-05	0.000226292	yes	14	NC_000014.9	77717599.0	77761156.0	-	SNW domain containing 1	22938.0	38.4411	36.6435	0.953238	33.5137	52.8602	1.57727	1.65465	SNW1	gene	protein_coding
PCMTD2	NC_000020.11:64255747-64276226	OK	0.635639	0.942476	0.24804240586720716	1.1875945731301347	0.0014	0.00458484	yes	20	NC_000020.11	64255748.0	64276226.0	+	protein-L-isoaspartate (D-aspartate) O-methyltransferase domain containing 2	55251.0	1.03858	0.931159	0.896574	0.635639	0.942476	1.48272	1.65377	PCMTD2	gene	protein_coding
E2F6	NC_000002.12:11444374-11466177	OK	6.71709	12.1604	0.7700745030372853	1.7053578486191037	5e-05	0.000226292	yes	2	NC_000002.12	11444375.0	11466177.0	-	E2F transcription factor 6	1876.0	6.14049	6.72426	1.09507	6.71709	12.1604	1.81037	1.6532	E2F6	gene	protein_coding
SET	NC_000009.12:128663130-128696396	OK	138.101	296.343	1.095995320942258	2.1376050495682994	5e-05	0.000226292	yes	9	NC_000009.12	128683896.0	128694664.0	+	protein SET isoform 1	6418.0	191.853	249.099	1.29839	138.101	296.342	2.14583	1.65269	SET	CDS	with_protein
CCDC88A	NC_000002.12:55287816-55419856	OK	4.62361	8.10062	0.6944682891717315	1.6182878969203054	5e-05	0.000226292	yes	2	NC_000002.12	55287817.0	55419856.0	-	coiled-coil domain containing 88A	55704.0	8.80031	9.33122	1.06033	4.62361	8.10062	1.75201	1.65233	CCDC88A	gene	protein_coding
EIF2AK2	NC_000002.12:37084517-37157065	OK	3.42476	7.08484	0.86962001765826	1.8271815872499295	5e-05	0.000226292	yes	2	NC_000002.12	37099210.0	37157065.0	-	eukaryotic translation initiation factor 2 alpha kinase 2	5610.0	7.9789	9.9942	1.25258	3.42477	7.08484	2.06871	1.65156	EIF2AK2	gene	protein_coding
SCRN3	NC_000002.12:174395729-174430074	OK	3.69475	6.58719	0.6925173314343591	1.61610096384259	5e-05	0.000226292	yes	2	NC_000002.12	174395730.0	174430074.0	+	secernin 3	79634.0	4.29852	4.6411	1.0797	3.69475	6.58719	1.78285	1.65125	SCRN3	gene	protein_coding
ALKBH8	NC_000011.10:107502725-107565737	OK	4.92114	6.61756	0.3634539930154501	1.2865022613888542	0.0004	0.00150745	yes	11	NC_000011.10	107502726.0	107565737.0	-	alkB homolog 8, tRNA methyltransferase	91801.0	6.2108	5.06174	0.81499	4.92113	6.61756	1.34472	1.64999	ALKBH8	gene	protein_coding
PHF10	NC_000006.12:169702111-169724500	OK	15.0291	28.9456	0.9016506154265489	1.8682022072355902	5e-05	0.000226292	yes	6	NC_000006.12	169703902.0	169724500.0	-	PHD finger protein 10	55274.0	18.2583	21.331	1.16829	15.0291	28.9456	1.92597	1.64853	PHF10	gene	protein_coding
SYNCRIP	NC_000006.12:85607783-85643862	OK	27.3135	47.7936	0.7852018290978888	1.7233333921980678	5e-05	0.000226292	yes	6	NC_000006.12	85614756.0	85641439.0	-	heterogeneous nuclear ribonucleoprotein Q isoform 1	10492.0	56.268	59.7264	1.06146	27.3135	47.7936	1.74982	1.6485	SYNCRIP	CDS	with_protein
BMPR2	NC_000002.12:202376309-202567751	OK	1.75822	2.35141	0.2810306586152782	1.2150626128445159	0.00035	0.00133833	yes	2	NC_000002.12	202376310.0	202567751.0	+	bone morphogenetic protein receptor type 2	659.0	4.01626	3.25982	0.811655	1.75822	2.35141	1.33738	1.64772	BMPR2	gene	protein_coding
RHOT1	NC_000017.11:32141225-32253374	OK	8.25093	13.8906	0.6867315740776245	1.6096327612467072	5e-05	0.000226292	yes	17	NC_000017.11	32142693.0	32224733.0	+	mitochondrial Rho GTPase 1 isoform 1	55288.0	11.524	11.8068	1.02454	8.25093	13.8906	1.68352	1.64319	RHOT1	CDS	with_protein
AIMP1	NC_000004.12:106041598-106349456	OK	10.6428	17.8845	0.6977645298651138	1.6219895557769604	5e-05	0.000226292	yes	4	NC_000004.12	106325010.0	106347692.0	+	aminoacyl tRNA synthase complex-interacting multifunctional protein 1 isoform a precursor	9255.0	11.2517	11.5098	1.02294	10.6428	17.8844	1.68042	1.64274	AIMP1	CDS	with_protein
SASS6	NC_000001.11:100038077-100132930	OK	4.80455	8.4952	0.710014162644883	1.635820175551938	5e-05	0.000226292	yes	1	NC_000001.11	100082632.0	100132930.0	-	SAS-6 centriolar assembly protein	163786.0	6.78127	7.29915	1.07637	4.80455	8.4952	1.76816	1.64271	SASS6	gene	protein_coding
PIAS2	NC_000018.10:46803217-47104795	OK	6.1113	9.19588	0.519801074082956	1.4337575408153223	0.00045	0.00167546	yes	18	NC_000018.10	46812433.0	46917345.0	-	E3 SUMO-protein ligase PIAS2 isoform 10	9063.0	6.98461	6.40378	0.916841	6.1113	9.19588	1.50473	1.64121	PIAS2	CDS	with_protein
HOXC9	NC_000012.12:54000160-54003337	OK	7.88928	15.0986	0.8567967553994675	1.8110128154361207	5e-05	0.000226292	yes	12	NC_000012.12	54000161.0	54003337.0	+	homeobox C9	3225.0	6.78401	7.91405	1.16657	7.88928	15.0986	1.91381	1.64054	HOXC9	gene	protein_coding
FLNB	NC_000003.12:58008421-58172251	OK	3.51774	5.74802	0.5788630048150507	1.4936716145683464	5e-05	0.000226292	yes	3	NC_000003.12	58008422.0	58172251.0	+	filamin B	2317.0	8.364	8.3375	0.996832	3.51774	5.74802	1.63401	1.6392	FLNB	gene	protein_coding
ELF2	NC_000004.12:139057219-139177218	OK	10.3963	18.4708	0.7727466562677892	1.7085194317453911	5e-05	0.000226292	yes	4	NC_000004.12	139057220.0	139177218.0	-	E74 like ETS transcription factor 2	1998.0	11.2675	12.2197	1.0845	10.3963	18.4708	1.77667	1.63823	ELF2	gene	protein_coding
RPS6KC1	NC_000001.11:213051240-213378753	OK	5.50351	8.04998	0.47669604072205773	1.391553176669214	5e-05	0.000226292	yes	1	NC_000001.11	213051241.0	213378753.0	+	ribosomal protein S6 kinase C1	26750.0	5.73915	5.12515	0.893016	5.50351	8.04998	1.4627	1.63793	RPS6KC1	gene	protein_coding
ZNF787	NC_000019.10:56087365-56121295	OK	26.3427	46.1756	0.786885155492496	1.725345338975302	5e-05	0.000226292	yes	19	NC_000019.10	56087366.0	56121295.0	-	zinc finger protein 787	126208.0	15.1926	16.2603	1.07028	26.3427	46.1755	1.75288	1.63778	ZNF787	gene	protein_coding
NCR3LG1	NC_000011.10:17350438-17377341	OK	1.97879	3.06861	0.4498095768586228	1.3658599632736779	5e-05	0.000226292	yes	11	NC_000011.10	17356668.0	17372512.0	+	natural cytotoxicity triggering receptor 3 ligand 1 isoform X1	374383.0	5.34531	5.06766	0.948058	1.97879	3.06861	1.55075	1.63572	NCR3LG1	CDS	with_protein
NSD1	NC_000005.10:177131834-177300213	OK	11.7267	21.8822	0.8463673854417806	1.7979680514194565	5e-05	0.000226292	yes	5	NC_000005.10	177135171.0	177295459.0	+	histone-lysine N-methyltransferase, H3 lysine-36 specific isoform a	64324.0	30.0376	34.2973	1.14181	11.7267	21.8822	1.86602	1.63426	NSD1	CDS	with_protein
MORF4L1	NC_000015.10:78872889-78898139	OK	46.515	88.7558	0.9176221391518693	1.888999263390509	5e-05	0.000226292	yes	15	NC_000015.10	78872890.0	78898139.0	+	mortality factor 4 like 1	10933.0	70.7187	82.637	1.16853	46.515	88.7558	1.90811	1.63292	MORF4L1	gene	protein_coding
CDCA7L	NC_000007.14:21543038-21945899	OK	15.4008	33.4576	1.0710560316787152	2.1009706843568616	5e-05	0.000226292	yes	7	NC_000007.14	21900899.0	21945899.0	-	cell division cycle associated 7 like	55536.0	17.6294	23.4636	1.33093	15.4008	33.4576	2.17246	1.63228	CDCA7L	gene	protein_coding
SNHG10	NC_000014.9:95532911-95534872	OK	15.1217	24.5811	0.666074421053839	1.5867495363392203	5e-05	0.000226292	yes	14	NC_000014.9	95532912.0	95534872.0	-	small nucleolar RNA host gene 10	283596.0	6.76563	6.75036	0.997743	15.1217	24.5811	1.62555	1.62923	SNHG10	gene	lncRNA
PCBP2	NC_000012.12:53452101-53506431	OK	116.561	252.787	1.110208634338485	2.158768639259618	5e-05	0.000226292	yes	12	NC_000012.12	53452102.0	53481162.0	+	poly(rC) binding protein 2	5094.0	122.279	163.039	1.33334	116.561	252.787	2.16871	1.62653	PCBP2	gene	protein_coding
DAZAP1	NC_000019.10:1407585-1435684	OK	84.5557	177.802	1.0634269938773269	2.089889978107828	5e-05	0.000226292	yes	19	NC_000019.10	1407586.0	1435684.0	+	DAZ associated protein 1	26528.0	73.1356	94.7016	1.29488	84.5557	177.802	2.10278	1.62392	DAZAP1	gene	protein_coding
NCOA6	NC_000020.11:34714773-34825651	OK	7.60886	12.3145	0.6291041407436846	1.5466043123015127	5e-05	0.000226292	yes	20	NC_000020.11	34714774.0	34825651.0	-	nuclear receptor coactivator 6	23054.0	10.9126	10.8862	0.99758	7.60886	12.3145	1.61845	1.62237	NCOA6	gene	protein_coding
CWC27	NC_000005.10:64768917-65018763	OK	11.7583	21.2059	0.7995069368760706	1.7405061802904782	5e-05	0.000226292	yes	5	NC_000005.10	64768918.0	65018763.0	+	CWC27 spliceosome associated cyclophilin	10283.0	11.6195	12.9197	1.1119	11.7583	21.2059	1.80348	1.62199	CWC27	gene	protein_coding
RMND1	NC_000006.12:151404547-151452169	OK	15.8371	22.8028	0.4994876204766774	1.4137113873529294	5e-05	0.000226292	yes	6	NC_000006.12	151404548.0	151452169.0	-	required for meiotic nuclear division 1 homolog	55005.0	16.5007	14.6607	0.888491	15.837	22.8028	1.43984	1.62055	RMND1	gene	protein_coding
PEX14	NC_000001.11:10474945-10630758	OK	12.6961	25.1065	0.9306439134220876	1.906126561575923	5e-05	0.000226292	yes	1	NC_000001.11	10474946.0	10630758.0	+	peroxisomal biogenesis factor 14	5195.0	8.00971	9.7817	1.22123	12.6961	25.1065	1.97749	1.61926	PEX14	gene	protein_coding
PDIA6	NC_000002.12:10720972-10837712	OK	43.2233	67.0279	0.6213198693064115	1.5382818559447176	5e-05	0.000226292	yes	2	NC_000002.12	10783391.0	10837712.0	-	protein disulfide isomerase family A member 6	10130.0	44.9956	43.0968	0.9578	43.2233	67.0279	1.55074	1.61906	PDIA6	gene	protein_coding
ZNF37BP	NC_000010.11:42513509-42552870	OK	2.51567	5.77523	0.9464702651408254	1.9271518657894509	5e-05	0.000226292	yes	10	NC_000010.11	42513510.0	42552870.0	-	zinc finger protein 37B, pseudogene	100129482.0	3.64319	5.16727	1.41834	2.51568	5.77523	2.2957	1.61858	ZNF37BP	gene	transcribed_pseudogene
CKAP2L	NC_000002.12:112717244-112764617	OK	5.37408	6.72386	0.27710488848616555	1.2117607560620511	0.00795	0.021026	yes	2	NC_000002.12	112736349.0	112764617.0	-	cytoskeleton associated protein 2 like	150468.0	5.53867	4.28248	0.773196	5.37408	6.72386	1.25117	1.61817	CKAP2L	gene	protein_coding
CSDE1	NC_000001.11:114716915-114757984	OK	166.744	338.475	1.0170441699184707	2.0237683613124773	5e-05	0.000226292	yes	1	NC_000001.11	114716916.0	114757984.0	-	cold shock domain containing E1	7812.0	161.316	202.563	1.2557	166.744	338.475	2.02991	1.61656	CSDE1	gene	protein_coding
DGKZ	NC_000011.10:46332904-46380554	OK	19.1869	44.0088	1.156787720582928	2.229604347373792	5e-05	0.000226292	yes	11	NC_000011.10	46332905.0	46380554.0	+	diacylglycerol kinase zeta	8525.0	19.0851	27.0829	1.41906	19.1869	44.0088	2.29369	1.61634	DGKZ	gene	protein_coding
ATMIN	NC_000016.10:81007213-81047350	OK	8.11112	13.6181	0.6820554921635535	1.6044240444643472	5e-05	0.000226292	yes	16	NC_000016.10	81035842.0	81047350.0	+	ATM interactor	23300.0	7.99799	8.30841	1.03881	8.11112	13.6181	1.67894	1.61621	ATMIN	gene	protein_coding
NDC1	NC_000001.11:53765477-53838296	OK	10.0187	12.4796	0.290823662957973	1.2233385063573743	0.00595	0.0163814	yes	1	NC_000001.11	53765478.0	53838296.0	-	NDC1 transmembrane nucleoporin	55706.0	14.5629	11.228	0.770999	10.0187	12.4796	1.24563	1.61561	NDC1	gene	protein_coding
BUB1	NC_000002.12:110637527-110678063	OK	21.9	31.8982	0.5226610518354198	1.436602620087336	5e-05	0.000226292	yes	2	NC_000002.12	110637528.0	110678063.0	-	BUB1 mitotic checkpoint serine/threonine kinase	699.0	29.2625	26.3846	0.901654	21.9	31.8982	1.45654	1.6154	BUB1	gene	protein_coding
ZBTB12	NC_000006.12:31897782-31945672	OK	0.179547	0.559357	0.40271835213234564	1.3219964952647074	0.0001	0.000428757	yes	6	NC_000006.12	31899194.0	31902331.0	-	zinc finger and BTB domain containing 12	221527.0	0.150695	0.290812	1.92981	0.179547	0.559357	3.11538	1.61435	ZBTB12	gene	protein_coding
JMJD1C	NC_000010.11:63167220-63625128	OK	2.64808	3.93862	0.43697059823014506	1.3537586895024232	0.00115	0.00386214	yes	10	NC_000010.11	63167221.0	63521890.0	-	jumonji domain containing 1C	221037.0	5.30804	4.8922	0.92166	2.64808	3.93862	1.48735	1.61377	JMJD1C	gene	protein_coding
ZNF138	NC_000007.14:64794427-64860823	OK	5.0585	7.63169	0.5106824057962083	1.424723941569695	5e-05	0.000226292	yes	7	NC_000007.14	64794428.0	64860823.0	+	zinc finger protein 138	7697.0	5.12099	4.78914	0.935199	5.0585	7.63169	1.50869	1.61322	ZNF138	gene	protein_coding
USP25	NC_000021.9:15729946-15880064	OK	8.86935	15.3577	0.7289429337922466	1.6574242477974739	5e-05	0.000226292	yes	21	NC_000021.9	15805142.0	15878475.0	+	ubiquitin carboxyl-terminal hydrolase 25 isoform 4	29761.0	10.0941	10.8359	1.07349	8.86934	15.3577	1.73154	1.61301	USP25	CDS	with_protein
PDZD8	NC_000010.11:117240037-117375492	OK	14.9253	26.6114	0.7939434895955051	1.733807212423	5e-05	0.000226292	yes	10	NC_000010.11	117277274.0	117375492.0	-	PDZ domain containing 8	118987.0	19.1912	21.2426	1.1069	14.9253	26.6114	1.78297	1.61079	PDZD8	gene	protein_coding
TEX261	NC_000002.12:70973244-70994873	OK	20.536	35.9	0.7768705012248036	1.713410104011887	5e-05	0.000226292	yes	2	NC_000002.12	70988600.0	70994757.0	-	protein TEX261	113419.0	18.6732	20.2687	1.08545	20.536	35.9	1.74815	1.61054	TEX261	CDS	with_protein
BCL7B	NC_000007.14:73536355-73557690	OK	42.2437	60.95	0.5186143147215727	1.4325786183883435	5e-05	0.000226292	yes	7	NC_000007.14	73536356.0	73557690.0	-	BAF chromatin remodeling complex subunit BCL7B	9275.0	17.1934	15.4132	0.896464	42.2437	60.95	1.44282	1.60945	BCL7B	gene	protein_coding
RNF10	NC_000012.12:120503278-120577588	OK	52.7482	76.7366	0.5323775688821701	1.446310760174294	5e-05	0.000226292	yes	12	NC_000012.12	120534353.0	120577588.0	+	ring finger protein 10	9921.0	39.7129	35.9067	0.904157	52.7483	76.7366	1.45477	1.60898	RNF10	gene	protein_coding
UBTD2	NC_000005.10:172209644-172283797	OK	10.945	18.3471	0.6957104785100241	1.6196818752616158	5e-05	0.000226292	yes	5	NC_000005.10	172209645.0	172283797.0	-	ubiquitin domain containing 2	92181.0	11.4221	11.9085	1.04259	10.945	18.3471	1.6763	1.60783	UBTD2	gene	protein_coding
SNX13	NC_000007.14:17790760-17940507	OK	7.73265	11.0534	0.4649487325199626	1.3802683034359557	0.00025	0.000985813	yes	7	NC_000007.14	17790761.0	17940507.0	-	sorting nexin 13	23161.0	7.51076	6.68804	0.89046	7.73265	11.0534	1.42944	1.60528	SNX13	gene	protein_coding
ZNF131	NC_000005.10:43120913-43176324	OK	10.1028	16.0869	0.6219671252763974	1.5389721511690746	5e-05	0.000226292	yes	5	NC_000005.10	43120914.0	43176324.0	+	zinc finger protein 131	7690.0	9.90525	9.83397	0.992803	10.1028	16.0869	1.59232	1.60386	ZNF131	gene	protein_coding
AFF4	NC_000005.10:132875380-132963655	OK	6.27562	8.59866	0.39976282148331466	1.319291002003953	5e-05	0.000226292	yes	5	NC_000005.10	132875381.0	132963655.0	-	AF4/FMR2 family member 4	27125.0	16.8983	14.4517	0.855216	6.27562	8.59866	1.37017	1.60213	AFF4	gene	protein_coding
SSH2	NC_000017.11:29625937-30108452	OK	5.88401	8.25018	0.4262322463228432	1.3437197214995331	0.0139	0.0340322	yes	17	NC_000017.11	29630841.0	29930000.0	-	protein phosphatase Slingshot homolog 2 isoform 1	85464.0	7.59331	6.64582	0.87522	5.88401	8.25019	1.40214	1.60204	SSH2	CDS	with_protein
ZBTB44	NC_000011.10:130226676-130314917	OK	5.28432	9.64979	0.7609964324592822	1.6946606792779486	5e-05	0.000226292	yes	11	NC_000011.10	130226677.0	130314917.0	-	zinc finger and BTB domain containing 44	29068.0	7.03402	8.03464	1.14225	5.28432	9.64978	1.82612	1.5987	ZBTB44	gene	protein_coding
NAMPT	NC_000007.14:106248297-106284983	OK	9.25245	17.7134	0.8681029949260908	1.825261279011359	5e-05	0.000226292	yes	7	NC_000007.14	106248298.0	106284983.0	-	nicotinamide phosphoribosyltransferase	10135.0	12.8254	15.3592	1.19756	9.25245	17.7134	1.91446	1.59864	NAMPT	gene	protein_coding
HOMER1	NC_000005.10:79372635-79514134	OK	4.61562	7.81928	0.6512155658662859	1.5704908807932159	5e-05	0.000226292	yes	5	NC_000005.10	79376009.0	79512774.0	-	homer protein homolog 1 isoform 1	9456.0	5.72728	6.07105	1.06002	4.61562	7.81928	1.69409	1.59816	HOMER1	CDS	with_protein
FOXK2	NC_000017.11:82519731-82604602	OK	21.6628	41.2867	0.8998778608362912	1.8659080078366306	5e-05	0.000226292	yes	17	NC_000017.11	82519732.0	82604602.0	+	forkhead box K2	3607.0	26.1418	31.1943	1.19327	21.6628	41.2867	1.90588	1.59719	FOXK2	gene	protein_coding
CINP	NC_000014.9:102348281-102362890	OK	18.0539	39.3098	1.0810443027907306	2.115566891817424	5e-05	0.000226292	yes	14	NC_000014.9	102348282.0	102362890.0	-	cyclin dependent kinase 2 interacting protein	51550.0	23.971	32.7133	1.3647	18.0539	39.3098	2.17736	1.59548	CINP	gene	protein_coding
MED9	NC_000017.11:17476999-17493221	OK	7.86449	15.5577	0.901392748444982	1.8678683150412487	5e-05	0.000226292	yes	17	NC_000017.11	17477000.0	17493221.0	+	mediator complex subunit 9	55090.0	7.013	8.69681	1.2401	7.86449	15.5577	1.97822	1.59521	MED9	gene	protein_coding
ALMS1	NC_000002.12:73385757-73609919	OK	3.12463	4.74734	0.47862969018391244	1.3934195309639898	5e-05	0.000226292	yes	2	NC_000002.12	73385758.0	73609919.0	+	ALMS1 centrosome and basal body associated protein	7840.0	8.20838	7.82323	0.953078	3.12463	4.74734	1.51933	1.59413	ALMS1	gene	protein_coding
LSM12	NC_000017.11:44034327-44067587	OK	33.2833	55.3325	0.7164615135624137	1.64314695493141	5e-05	0.000226292	yes	17	NC_000017.11	44034328.0	44067587.0	-	LSM12 homolog	124801.0	28.0449	29.2794	1.04402	33.2833	55.3325	1.66247	1.59238	LSM12	gene	protein_coding
ASXL2	NC_000002.12:25733752-25878487	OK	2.25539	3.7584	0.5476461619964115	1.4616989055074818	5e-05	0.000226292	yes	2	NC_000002.12	25733753.0	25878487.0	-	ASXL transcriptional regulator 2	55252.0	5.79755	6.07442	1.04776	2.25539	3.75839	1.66641	1.59045	ASXL2	gene	protein_coding
SOCS6	NC_000018.10:70289044-70330199	OK	1.4104	2.06515	0.3466850991209396	1.2716354132094259	5e-05	0.000226292	yes	18	NC_000018.10	70289045.0	70330199.0	+	suppressor of cytokine signaling 6	9306.0	2.20592	2.03127	0.920828	1.4104	2.06515	1.46423	1.59012	SOCS6	gene	protein_coding
RAB12	NC_000018.10:8609427-8639383	OK	9.48407	12.4291	0.35716372915547945	1.2809052209685743	0.00275	0.00832225	yes	18	NC_000018.10	8609428.0	8639383.0	+	RAB12, member RAS oncogene family	201475.0	8.86205	7.30536	0.824342	9.48407	12.4291	1.31053	1.58979	RAB12	gene	protein_coding
ZFP62	NC_000005.10:180843579-180861276	OK	7.87523	13.9458	0.7518837095639013	1.6839901613817334	5e-05	0.000226292	yes	5	NC_000005.10	180843580.0	180861276.0	-	ZFP62 zinc finger protein	643836.0	8.30856	9.25676	1.11412	7.87522	13.9458	1.77084	1.58945	ZFP62	gene	protein_coding
COX10	NC_000017.11:14069503-14208677	OK	10.1261	13.86	0.41748613835086923	1.3355982779230817	0.00025	0.000985813	yes	17	NC_000017.11	14069504.0	14208677.0	+	cytochrome c oxidase assembly factor heme A:farnesyltransferase COX10	1352.0	8.21288	7.07875	0.861909	10.1261	13.8599	1.36873	1.58802	COX10	gene	protein_coding
C8orf44	NC_000008.11:66667595-66862022	OK	3.79492	7.77723	0.8722589673977708	1.8305268909595993	0.00085	0.00295249	yes	8	NC_000008.11	66667596.0	66681531.0	+	chromosome 8 open reading frame 44	56260.0	2.23019	2.87814	1.29053	3.79492	7.77725	2.04938	1.58801	C8orf44	gene	lncRNA
SLMAP	NC_000003.12:57756228-57930013	OK	8.24495	13.0081	0.5995238657749047	1.515216415448434	5e-05	0.000226292	yes	3	NC_000003.12	57756229.0	57930013.0	+	sarcolemma associated protein	7871.0	10.4939	10.4373	0.994604	8.24495	13.0081	1.57771	1.58627	SLMAP	gene	protein_coding
DSG2	NC_000018.10:31498176-31556911	OK	8.05698	12.5689	0.5832017926071624	1.4981704718349824	5e-05	0.000226292	yes	18	NC_000018.10	31498177.0	31549008.0	+	desmoglein 2	1829.0	19.565	19.2434	0.983561	8.05698	12.5689	1.56	1.58608	DSG2	gene	protein_coding
PPT1	NC_000001.11:40040239-40097252	OK	20.0712	31.8662	0.6413321835768038	1.5597687839325713	0.0003	0.0011627	yes	1	NC_000001.11	40071461.0	40097252.0	-	palmitoyl-protein thioesterase 1	5538.0	24.0379	24.0681	1.00126	20.0712	31.8662	1.58765	1.58566	PPT1	gene	protein_coding
MKRN2	NC_000003.12:12484455-12664117	OK	19.886	28.4636	0.49639749645389575	1.410686584314852	0.01155	0.0290654	yes	3	NC_000003.12	12557087.0	12583713.0	+	makorin ring finger protein 2	23609.0	20.3164	18.3585	0.903631	19.886	28.4636	1.43134	1.58399	MKRN2	gene	protein_coding
ATF2	NC_000002.12:175072258-175168203	OK	12.5152	16.3874	0.3634593561793369	1.2865070439209192	0.00805	0.0212571	yes	2	NC_000002.12	175072259.0	175168203.0	-	activating transcription factor 2	1386.0	12.3221	10.1864	0.826675	12.5152	16.3874	1.30941	1.58394	ATF2	gene	protein_coding
RNF157	NC_000017.11:76136332-76240493	OK	16.504	26.0192	0.6263003159090541	1.5436014625228516	5e-05	0.000226292	yes	17	NC_000017.11	76145235.0	76240240.0	-	E3 ubiquitin ligase RNF157 isoform 1	114804.0	14.809	14.7456	0.995719	16.504	26.0192	1.57654	1.58332	RNF157	CDS	with_protein
RCN2	NC_000015.10:76931748-76954393	OK	8.88993	16.2288	0.8007900053009767	1.742054797152255	5e-05	0.000226292	yes	15	NC_000015.10	76931749.0	76954393.0	+	reticulocalbin 2	5955.0	6.13009	7.06782	1.15297	8.88993	16.2288	1.82552	1.58332	RCN2	gene	protein_coding
CENPJ	NC_000013.11:24747640-24922889	OK	5.30491	7.35506	0.4061744118948698	1.325167210951465	0.0002	0.000805209	yes	13	NC_000013.11	24882279.0	24922889.0	-	centromere protein J	55835.0	5.00455	4.38292	0.875786	5.30491	7.35506	1.38646	1.58311	CENPJ	gene	protein_coding
PKNOX1	NC_000021.9:42974561-43033931	OK	4.05838	5.95112	0.45857003051006107	1.3741790850034996	5e-05	0.000226292	yes	21	NC_000021.9	43004382.0	43030101.0	+	homeobox protein PKNOX1 isoform 1	5316.0	4.41338	4.08827	0.926336	4.05838	5.95111	1.46638	1.58298	PKNOX1	CDS	with_protein
MED12L	NC_000003.12:151085664-151619926	OK	2.17484	2.91753	0.3032604354243542	1.233929898829547	0.00365	0.0107058	yes	3	NC_000003.12	151085665.0	151436677.0	+	mediator complex subunit 12L	116931.0	4.07925	3.45767	0.847623	2.17484	2.91753	1.34149	1.58265	MED12L	gene	protein_coding
ACTL6A	NC_000003.12:179562925-179604646	OK	14.0555	19.8872	0.47232848578706	1.3873468167779215	0.0047	0.0133738	yes	3	NC_000003.12	179562926.0	179588407.0	+	actin like 6A	86.0	16.9541	15.1586	0.894095	14.0555	19.8872	1.41491	1.58251	ACTL6A	gene	protein_coding
USP53	NC_000004.12:119192772-119295518	OK	2.46798	3.43225	0.3539436800553457	1.2780494697201255	5e-05	0.000226292	yes	4	NC_000004.12	119239760.0	119293211.0	+	inactive ubiquitin carboxyl-terminal hydrolase 53 isoform 1	54532.0	3.99304	3.51276	0.879722	2.46798	3.43225	1.39071	1.58085	USP53	CDS	with_protein
C22orf46	NC_000022.11:41673932-41698136	OK	1.95972	5.53648	1.143053232022922	2.208479180463017	5e-05	0.000226292	yes	22	NC_000022.11	41688937.0	41698136.0	+	chromosome 22 putative open reading frame 46	79640.0	2.32877	4.16632	1.78906	1.95972	5.53649	2.82515	1.57912	C22orf46	gene	transcribed_pseudogene
EIF2AK1	NC_000007.14:6009271-6059175	OK	31.9506	53.8931	0.7363200798903602	1.6659211061407075	5e-05	0.000226292	yes	7	NC_000007.14	6022247.0	6059175.0	-	eukaryotic translation initiation factor 2 alpha kinase 1	27102.0	32.6972	34.9505	1.06891	31.9506	53.8931	1.68676	1.57802	EIF2AK1	gene	protein_coding
PHKB	NC_000016.10:47461298-47701523	OK	6.07309	8.95592	0.4932140190245802	1.407577169242863	5e-05	0.000226292	yes	16	NC_000016.10	47461351.0	47699366.0	+	phosphorylase b kinase regulatory subunit beta isoform a	5257.0	8.02999	7.51808	0.936251	6.07309	8.95592	1.47469	1.5751	PHKB	CDS	with_protein
COPS3	NC_000017.11:17246615-17281303	OK	61.7854	78.8168	0.3462633232540906	1.2712637014337729	0.0021	0.0065786	yes	17	NC_000017.11	17247098.0	17281186.0	-	COP9 signalosome complex subunit 3 isoform 1	8533.0	60.5595	49.0518	0.809977	61.7854	78.8168	1.27565	1.57493	COPS3	CDS	with_protein
DCUN1D4	NC_000004.12:51843131-51916837	OK	8.11553	10.4616	0.3304100076674428	1.2573706630333072	0.0018	0.00572643	yes	4	NC_000004.12	51843243.0	51913584.0	+	DCN1-like protein 4 isoform 1	23142.0	8.1534	6.67597	0.818796	8.11553	10.4616	1.28908	1.57436	DCUN1D4	CDS	with_protein
SESN3	NC_000011.10:95165512-95234404	OK	2.23968	3.74902	0.5517785142941318	1.4658916930067165	5e-05	0.000226292	yes	11	NC_000011.10	95165513.0	95232536.0	-	sestrin 3	143686.0	5.63189	5.99897	1.06518	2.23968	3.74902	1.67391	1.57148	SESN3	gene	protein_coding
PDXDC1	NC_000016.10:14974590-15153343	OK	1.1444	2.13834	0.5494276185753753	1.463504943107629	5e-05	0.000226292	yes	16	NC_000016.10	14974591.0	15153343.0	+	pyridoxal dependent decarboxylase domain containing 1	23042.0	1.2664	1.50626	1.1894	1.1444	2.13834	1.86852	1.57097	PDXDC1	gene	protein_coding
TXNDC5	NC_000006.12:7726098-8102595	OK	42.1772	60.2642	0.5047745860530366	1.41890164253356	5e-05	0.000226292	yes	6	NC_000006.12	7881517.0	7910788.0	-	thioredoxin domain containing 5	81567.0	38.3599	34.9009	0.909829	42.1772	60.2641	1.42883	1.57044	TXNDC5	gene	protein_coding
NOP58	NC_000002.12:202265762-202303661	OK	77.6043	93.7562	0.269612107069479	1.2054836694684647	0.0136	0.0334301	yes	2	NC_000002.12	202265763.0	202303661.0	+	NOP58 ribonucleoprotein	51602.0	52.6254	40.5678	0.770878	77.6043	93.7562	1.20813	1.56721	NOP58	gene	protein_coding
ELP3	NC_000008.11:28090231-28191153	OK	12.7873	16.9957	0.3843122634823328	1.3052374286481039	0.00055	0.00199986	yes	8	NC_000008.11	28090232.0	28191153.0	+	elongator acetyltransferase complex subunit 3	55140.0	14.9554	12.7081	0.849731	12.7873	16.9957	1.32911	1.56415	ELP3	gene	protein_coding
SLC27A4	NC_000009.12:128340515-128361470	OK	12.8224	21.6885	0.7149530972135967	1.6414298529922449	5e-05	0.000226292	yes	9	NC_000009.12	128343133.0	128360491.0	+	long-chain fatty acid transport protein 4	10999.0	14.4361	15.6167	1.08178	12.8224	21.6885	1.69146	1.56359	SLC27A4	CDS	with_protein
TBL1XR1	NC_000003.12:177019343-177197482	OK	5.22771	7.55914	0.4587640803461075	1.3743639315253922	5e-05	0.000226292	yes	3	NC_000003.12	177025498.0	177064977.0	-	F-box-like/WD repeat-containing protein TBL1XR1 isoform 1	79718.0	11.3184	10.467	0.924777	5.22771	7.55913	1.44597	1.56359	TBL1XR1	CDS	with_protein
TIMM44	NC_000019.10:7926717-7943666	OK	75.9796	106.715	0.48467108857277097	1.3992668187415884	5e-05	0.000226292	yes	19	NC_000019.10	7927187.0	7943651.0	-	mitochondrial import inner membrane translocase subunit TIM44	10469.0	51.14	45.9976	0.899444	75.9796	106.715	1.40453	1.56155	TIMM44	CDS	with_protein
ZNF598	NC_000016.10:1997653-2009821	OK	26.9863	53.0047	0.9483642053642525	1.9296834522605704	5e-05	0.000226292	yes	16	NC_000016.10	1998232.0	2009747.0	-	E3 ubiquitin-protein ligase ZNF598	90850.0	28.8813	36.3833	1.25975	26.9864	53.0047	1.96413	1.55914	ZNF598	CDS	with_protein
ESYT2	NC_000007.14:158730996-158829577	OK	9.22763	13.1665	0.47001149258763597	1.3851205020126853	5e-05	0.000226292	yes	7	NC_000007.14	158730997.0	158829577.0	-	extended synaptotagmin 2	57488.0	12.746	11.6716	0.915707	9.22763	13.1665	1.42686	1.5582	ESYT2	gene	protein_coding
TBC1D22A	NC_000022.11:46762630-47224975	OK	7.64352	13.3063	0.7269597375063106	1.6551474399318802	5e-05	0.000226292	yes	22	NC_000022.11	46762631.0	47224975.0	+	TBC1 domain family member 22A	25771.0	6.62705	7.40905	1.118	7.64352	13.3063	1.74086	1.55712	TBC1D22A	gene	protein_coding
HOOK3	NC_000008.11:42849636-43030535	OK	1.59565	2.75761	0.5337194760761901	1.447656656328858	5e-05	0.000226292	yes	8	NC_000008.11	42896978.0	43030535.0	+	hook microtubule tethering protein 3	84376.0	5.55024	6.16177	1.11018	1.59565	2.75761	1.7282	1.55668	HOOK3	gene	protein_coding
GFRA3	NC_000005.10:138252379-138274621	OK	0.923433	1.40105	0.3199818705644013	1.2483148620201483	0.0021	0.0065786	yes	5	NC_000005.10	138252380.0	138274621.0	-	GDNF family receptor alpha 3	2676.0	0.809664	0.789166	0.974683	0.923433	1.40105	1.51722	1.55663	GFRA3	gene	protein_coding
PITPNB	NC_000022.11:27851668-27919263	OK	17.3664	27.7087	0.6444191319190571	1.5631098092168312	5e-05	0.000226292	yes	22	NC_000022.11	27851669.0	27919263.0	-	phosphatidylinositol transfer protein beta	23760.0	26.6343	27.309	1.02533	17.3664	27.7087	1.59553	1.55611	PITPNB	gene	protein_coding
NEK4	NC_000003.12:52706105-52770946	OK	19.8056	30.3327	0.5906972009328451	1.5059743530587923	0.0001	0.000428757	yes	3	NC_000003.12	52708444.0	52770946.0	-	NIMA related kinase 4	6787.0	23.1664	22.8071	0.984488	19.8056	30.3327	1.53152	1.55566	NEK4	gene	protein_coding
KMT2A	NC_000011.10:118436491-118531094	OK	4.85113	7.08074	0.46577214272669387	1.3810563087813805	5e-05	0.000226292	yes	11	NC_000011.10	118436513.0	118522172.0	+	histone-lysine N-methyltransferase 2A isoform 1	4297.0	16.8258	15.7985	0.938945	4.85113	7.08075	1.45961	1.55452	KMT2A	CDS	with_protein
ZCCHC7	NC_000009.12:37120165-37358149	OK	11.3218	19.0595	0.7030726220018648	1.6279683163174208	5e-05	0.000226292	yes	9	NC_000009.12	37126333.0	37357268.0	+	zinc finger CCHC domain-containing protein 7	84186.0	9.26097	10.0416	1.08429	11.3218	19.0595	1.68343	1.55256	ZCCHC7	CDS	with_protein
PCGF5	NC_000010.11:91162401-91284337	OK	8.22821	13.2079	0.6225705927398115	1.5396160252096558	0.00115	0.00386214	yes	10	NC_000010.11	91162402.0	91284337.0	+	polycomb group ring finger 5	84333.0	6.47633	6.70378	1.03512	8.22821	13.2079	1.6052	1.55073	PCGF5	gene	protein_coding
RBM38	NC_000020.11:57384159-57409333	OK	19.9052	31.2584	0.6258130376300644	1.543080190574594	5e-05	0.000226292	yes	20	NC_000020.11	57391396.0	57409333.0	+	RNA binding motif protein 38	55544.0	12.0238	12.1844	1.01336	19.9052	31.2584	1.57036	1.54966	RBM38	gene	protein_coding
UNK	NC_000017.11:75784770-75825799	OK	28.1745	38.9458	0.45333589173990063	1.369202557027541	0.00145	0.00473171	yes	17	NC_000017.11	75784881.0	75824417.0	+	RING finger protein unkempt homolog	85451.0	22.1918	19.8018	0.892301	28.1745	38.9458	1.38231	1.54915	UNK	CDS	with_protein
TAF11	NC_000006.12:34792082-34888071	OK	33.9388	60.3866	0.8130937073307098	1.7569750535221582	5e-05	0.000226292	yes	6	NC_000006.12	34877462.0	34888071.0	-	TATA-box binding protein associated factor 11	6882.0	20.3678	23.4027	1.14901	33.9388	60.3866	1.77928	1.54854	TAF11	gene	protein_coding
TFG	NC_000003.12:100709289-100748967	OK	26.9946	40.5598	0.5700401452224062	1.4845648803697855	5e-05	0.000226292	yes	3	NC_000003.12	100713686.0	100748531.0	+	protein TFG isoform 1	10342.0	33.5661	32.5996	0.971206	26.9946	40.5598	1.50252	1.54706	TFG	CDS	with_protein
APTX	NC_000009.12:32883871-33025120	OK	29.8579	41.6424	0.46664875391358596	1.3818957220031176	0.00025	0.000985813	yes	9	NC_000009.12	32883872.0	33025120.0	-	aprataxin	54840.0	22.5498	20.3573	0.902771	29.8579	41.6424	1.39468	1.54489	APTX	gene	protein_coding
CHMP3	NC_000002.12:86503429-86778041	OK	19.3547	33.9402	0.7795259080454953	1.7165666897571563	5e-05	0.000226292	yes	2	NC_000002.12	86503430.0	86563443.0	-	charged multivesicular body protein 3	51652.0	12.6627	14.3755	1.13526	19.3547	33.9402	1.75358	1.54465	CHMP3	gene	protein_coding
GRSF1	NC_000004.12:70815782-70843274	OK	24.5677	44.8736	0.8433417439964286	1.7942012773929605	5e-05	0.000226292	yes	4	NC_000004.12	70815783.0	70843274.0	-	G-rich RNA sequence binding factor 1	2926.0	30.0518	35.5617	1.18335	24.5677	44.8736	1.82653	1.54352	GRSF1	gene	protein_coding
ATP8B2	NC_000001.11:154325524-154351304	OK	14.9658	23.5658	0.6216663780930758	1.5386513672975985	5e-05	0.000226292	yes	1	NC_000001.11	154325525.0	154351304.0	+	ATPase phospholipid transporting 8B2	57198.0	18.1805	18.5584	1.02079	14.9658	23.5658	1.57464	1.54258	ATP8B2	gene	protein_coding
ACVR2B	NC_000003.12:38346784-38493142	OK	2.5884	4.23629	0.5452042830157962	1.4592269535168876	5e-05	0.000226292	yes	3	NC_000003.12	38453890.0	38493142.0	+	activin A receptor type 2B	93.0	7.54692	8.01151	1.06156	2.5884	4.23629	1.63664	1.54173	ACVR2B	gene	protein_coding
LIN28B	NC_000006.12:104936293-105083332	OK	8.71517	11.4894	0.3623930244660398	1.285556505959237	0.0007	0.00247516	yes	6	NC_000006.12	104936999.0	105083332.0	+	lin-28 homolog B	389421.0	11.7233	10.0258	0.855199	8.71517	11.4894	1.31833	1.54154	LIN28B	gene	protein_coding
VRK1	NC_000014.9:96797381-96881614	OK	43.0978	64.6141	0.5732991901809781	1.4879222999786839	5e-05	0.000226292	yes	14	NC_000014.9	96833472.0	96881208.0	+	serine/threonine-protein kinase VRK1	7443.0	31.223	30.3686	0.972638	43.0978	64.6141	1.49924	1.54142	VRK1	CDS	with_protein
FUCA2	NC_000006.12:143494811-143511720	OK	17.2554	21.9712	0.3315029436217909	1.258323564534329	0.0019	0.00601488	yes	6	NC_000006.12	143494812.0	143511720.0	-	alpha-L-fucosidase 2	2519.0	17.7961	14.7075	0.826447	17.2555	21.9712	1.27329	1.54068	FUCA2	gene	protein_coding
GMPS	NC_000003.12:155869429-155944020	OK	10.2344	15.1528	0.5238611939369937	1.4377981912696718	5e-05	0.000226292	yes	3	NC_000003.12	155870871.0	155937692.0	+	GMP synthase [glutamine-hydrolyzing]	8833.0	13.615	13.1039	0.962456	10.2344	15.1528	1.48058	1.53833	GMPS	CDS	with_protein
PANK3	NC_000005.10:168548494-168579368	OK	6.86319	10.8872	0.5962223118379364	1.5117528636596596	5e-05	0.000226292	yes	5	NC_000005.10	168548495.0	168579368.0	-	pantothenate kinase 3	79646.0	15.4329	15.9182	1.03145	6.86319	10.8872	1.58631	1.53795	PANK3	gene	protein_coding
CAPRIN1	NC_000011.10:34044869-34102610	OK	67.492	99.2088	0.5490018133112704	1.4630730596274018	5e-05	0.000226292	yes	11	NC_000011.10	34052421.0	34099367.0	+	caprin-1 isoform 1	4076.0	98.166	93.8784	0.956323	67.492	99.2088	1.46993	1.53707	CAPRIN1	CDS	with_protein
NCOA1	NC_000002.12:24491253-24770702	OK	2.7267	3.92841	0.4032235939183193	1.3224595486623556	5e-05	0.000226292	yes	2	NC_000002.12	24491254.0	24770702.0	+	nuclear receptor coactivator 1	8648.0	4.64367	4.35723	0.938316	2.7267	3.92841	1.44072	1.53543	NCOA1	gene	protein_coding
CCNY	NC_000010.11:35247024-35572667	OK	10.5957	17.3127	0.6592546017650305	1.5792664522193567	5e-05	0.000226292	yes	10	NC_000010.11	35247025.0	35572667.0	+	cyclin Y	219771.0	10.4667	11.1508	1.06535	10.5957	17.3127	1.63394	1.53371	CCNY	gene	protein_coding
GOLM1	NC_000009.12:85941141-86100149	OK	20.9014	35.3649	0.7315235150727677	1.6603915731414431	5e-05	0.000226292	yes	9	NC_000009.12	86026146.0	86100149.0	-	golgi membrane protein 1	51280.0	18.2263	20.1103	1.10336	20.9014	35.3649	1.69199	1.53348	GOLM1	gene	protein_coding
NABP2	NC_000012.12:56222011-56229858	OK	81.6769	132.156	0.6875612372278805	1.6105586929359947	5e-05	0.000226292	yes	12	NC_000012.12	56222012.0	56229858.0	+	nucleic acid binding protein 2	79035.0	41.0346	43.3053	1.05534	81.6769	132.156	1.61803	1.53319	NABP2	gene	protein_coding
BCL11A	NC_000002.12:60450519-60553654	OK	2.87558	5.91962	0.8362805794500976	1.7854411468735003	5e-05	0.000226292	yes	2	NC_000002.12	60450520.0	60553654.0	-	BAF chromatin remodeling complex subunit BCL11A	53335.0	3.88171	5.2161	1.34376	2.87558	5.91962	2.05858	1.53195	BCL11A	gene	protein_coding
E2F4	NC_000016.10:67192154-67198918	OK	52.1211	106.439	1.0161608553281516	2.0225296539416537	5e-05	0.000226292	yes	16	NC_000016.10	67192155.0	67198918.0	+	E2F transcription factor 4	1874.0	28.8205	38.4432	1.33388	52.1211	106.438	2.04214	1.53097	E2F4	gene	protein_coding
RNPS1	NC_000016.10:2251597-2268126	OK	162.923	277.737	0.765886227962338	1.7004142188710547	5e-05	0.000226292	yes	16	NC_000016.10	2253116.0	2268126.0	-	RNA binding protein with serine rich domain 1	10921.0	112.802	125.681	1.11417	162.923	277.737	1.70472	1.53003	RNPS1	gene	protein_coding
LARP7	NC_000004.12:112637142-112657586	OK	11.8484	27.8801	1.1684870246433556	2.2477584757635194	5e-05	0.000226292	yes	4	NC_000004.12	112637143.0	112657586.0	+	La ribonucleoprotein 7, transcriptional regulator	51574.0	11.0955	17.0943	1.54065	11.8484	27.8801	2.35307	1.52733	LARP7	gene	protein_coding
GOLPH3L	NC_000001.11:150646229-150697154	OK	10.5701	15.4619	0.5087295247172707	1.4227966914719838	5e-05	0.000226292	yes	1	NC_000001.11	150646230.0	150697154.0	-	golgi phosphoprotein 3 like	55204.0	11.2775	10.8021	0.957844	10.5701	15.462	1.4628	1.52718	GOLPH3L	gene	protein_coding
CENPK	NC_000005.10:65488918-65563194	OK	8.29624	10.1751	0.2655685211393721	1.20210967014621	0.0203	0.047243	yes	5	NC_000005.10	65488919.0	65563194.0	-	centromere protein K	64105.0	8.20179	6.59459	0.804044	8.29624	10.1751	1.22647	1.52538	CENPK	gene	protein_coding
EVA1A	NC_000002.12:75492317-75569719	OK	1.1279	1.71622	0.35216998184649895	1.2764791578551624	0.0015	0.0048744	yes	2	NC_000002.12	75492318.0	75569719.0	-	eva-1 homolog A, regulator of programmed cell death	84141.0	0.623258	0.621848	0.997738	1.1279	1.71622	1.52161	1.52506	EVA1A	gene	protein_coding
DUSP22	NC_000006.12:292458-351355	OK	13.2018	19.5971	0.5363674302895474	1.4503161571068457	5e-05	0.000226292	yes	6	NC_000006.12	292459.0	351355.0	+	dual specificity phosphatase 22	56940.0	9.67002	9.42029	0.974175	13.2018	19.5971	1.48443	1.52378	DUSP22	gene	protein_coding
TMCC1	NC_000003.12:129647791-129893711	OK	2.65824	4.86051	0.6798764913085222	1.6020026023442968	5e-05	0.000226292	yes	3	NC_000003.12	129647792.0	129893711.0	-	transmembrane and coiled-coil domain family 1	23023.0	2.32446	2.79189	1.20109	2.65824	4.86051	1.82847	1.52234	TMCC1	gene	protein_coding
CFL2	NC_000014.9:34709112-34714593	OK	11.2358	17.191	0.5721164226845814	1.4867029536278786	5e-05	0.000226292	yes	14	NC_000014.9	34709113.0	34714593.0	-	cofilin 2	1073.0	13.8042	13.8884	1.0061	11.2358	17.191	1.53001	1.52074	CFL2	gene	protein_coding
LRRFIP1	NC_000002.12:237627575-237781643	OK	6.45859	15.803	1.1717440052647832	2.2528386732613	5e-05	0.000226292	yes	2	NC_000002.12	237627645.0	237779532.0	+	leucine-rich repeat flightless-interacting protein 1 isoform 1	9208.0	9.1232	14.698	1.61106	6.45859	15.803	2.44681	1.51876	LRRFIP1	CDS	with_protein
TRAF7	NC_000016.10:2155777-2196605	OK	37.9764	82.3255	1.0961572250810008	2.137844952330127	5e-05	0.000226292	yes	16	NC_000016.10	2163921.0	2176574.0	+	E3 ubiquitin-protein ligase TRAF7	84231.0	26.2669	37.5121	1.42811	37.9764	82.3255	2.16781	1.51795	TRAF7	CDS	with_protein
NAPG	NC_000018.10:10526026-10552769	OK	4.12078	5.74873	0.3982524571663433	1.3179105526892387	5e-05	0.000226292	yes	18	NC_000018.10	10526103.0	10550220.0	+	gamma-soluble NSF attachment protein	8774.0	4.40917	4.05344	0.91932	4.12079	5.74873	1.39506	1.51749	NAPG	CDS	with_protein
ATP6V0C	NC_000016.10:2513725-2520218	OK	54.4741	75.1621	0.45725890165692373	1.372930791125949	0.00015	0.000620904	yes	16	NC_000016.10	2513726.0	2520218.0	+	ATPase H+ transporting V0 subunit c	527.0	28.3509	25.7992	0.909994	54.4741	75.1621	1.37978	1.51625	ATP6V0C	gene	protein_coding
CREB1	NC_000002.12:207529942-207626053	OK	12.1752	17.6195	0.49898946971797065	1.4132233286781226	0.01075	0.0273017	yes	2	NC_000002.12	207529943.0	207605988.0	+	cAMP responsive element binding protein 1	1385.0	11.1806	10.6816	0.955374	12.1752	17.6195	1.44717	1.51477	CREB1	gene	protein_coding
VPS13A	NC_000009.12:77176755-77421537	OK	2.41477	3.57161	0.4209139239278801	1.338775378722432	5e-05	0.000226292	yes	9	NC_000009.12	77177353.0	77421537.0	+	vacuolar protein sorting 13 homolog A	23230.0	5.84287	5.7123	0.977653	2.41477	3.57161	1.47906	1.51287	VPS13A	gene	protein_coding
PCM1	NC_000008.11:17922783-18029948	OK	8.34098	14.1949	0.7019413583299987	1.6266922742581615	5e-05	0.000226292	yes	8	NC_000008.11	17922784.0	18029948.0	+	pericentriolar material 1	5108.0	14.4386	16.2543	1.12575	8.34098	14.1949	1.70182	1.51172	PCM1	gene	protein_coding
UNC5C	NC_000004.12:95162503-95552460	OK	0.761163	1.1939	0.31696932750988327	1.2457109307883485	5e-05	0.000226292	yes	4	NC_000004.12	95169234.0	95548857.0	-	netrin receptor UNC5C isoform X1	8633.0	1.89519	1.96743	1.03812	0.761163	1.1939	1.56852	1.51093	UNC5C	CDS	with_protein
WBP1	NC_000002.12:74455022-74460891	OK	24.9581	45.778	0.849645391066705	1.8020579318208958	5e-05	0.000226292	yes	2	NC_000002.12	74458438.0	74460881.0	+	WW domain binding protein 1	23559.0	15.181	18.4323	1.21416	24.9581	45.778	1.83419	1.51066	WBP1	gene	protein_coding
NOLC1	NC_000010.11:102152369-102163870	OK	48.1541	89.5157	0.8808562917441147	1.8414679548603268	5e-05	0.000226292	yes	10	NC_000010.11	102152370.0	102163870.0	+	nucleolar and coiled-body phosphoprotein 1	9221.0	84.2379	103.678	1.23078	48.1541	89.5157	1.85894	1.51038	NOLC1	gene	protein_coding
TAOK1	NC_000017.11:29390362-29551903	OK	3.69039	5.41895	0.45262943725645055	1.3685322542475147	5e-05	0.000226292	yes	17	NC_000017.11	29451549.0	29543022.0	+	serine/threonine-protein kinase TAO1 isoform 1	57551.0	12.0722	11.7437	0.972786	3.69038	5.41895	1.4684	1.50948	TAOK1	CDS	with_protein
SERBP1	NC_000001.11:67407809-67430402	OK	67.2867	149.393	1.1390608972299328	2.2023761581684287	5e-05	0.000226292	yes	1	NC_000001.11	67413207.0	67430300.0	-	plasminogen activator inhibitor 1 RNA-binding protein isoform 1	26135.0	100.652	148.242	1.47282	67.2867	149.393	2.22025	1.50748	SERBP1	CDS	with_protein
SNX2	NC_000005.10:122774995-122845319	OK	9.28874	13.4984	0.4948273826412306	1.4091521410784995	5e-05	0.000226292	yes	5	NC_000005.10	122774996.0	122834543.0	+	sorting nexin 2	6643.0	10.7864	10.411	0.965201	9.28874	13.4984	1.4532	1.50559	SNX2	gene	protein_coding
NUFIP2	NC_000017.11:29255838-29294148	OK	8.82047	12.3917	0.4474751366423688	1.3636516378543997	5e-05	0.000226292	yes	17	NC_000017.11	29255839.0	29294148.0	-	nuclear FMR1 interacting protein 2	57532.0	15.2134	14.2069	0.933841	8.82047	12.3917	1.40488	1.50441	NUFIP2	gene	protein_coding
TIMM9	NC_000014.9:58395903-58551297	OK	33.365	45.3979	0.43311955012386516	1.3501498617779717	0.00585	0.0161398	yes	14	NC_000014.9	58409034.0	58411945.0	-	mitochondrial import inner membrane translocase subunit Tim9 isoform a	26520.0	19.2842	17.446	0.904675	33.365	45.3979	1.36065	1.50402	TIMM9	CDS	with_protein
ZNF292	NC_000006.12:87155564-87265943	OK	1.53868	2.18639	0.32784430205841564	1.2551365276442874	5e-05	0.000226292	yes	6	NC_000006.12	87155565.0	87265943.0	+	zinc finger protein 292	23036.0	3.60962	3.41655	0.946511	1.53868	2.18639	1.42095	1.50125	ZNF292	gene	protein_coding

## Sheet: Supplementary Table S6
Supplementary Table S6. List of primer sequences for RT-qPCR and cloning
Genes	Forward primer sequence	Reverse primer sequence
pCI-Flag-RBMX	5'-AAAACTCGAGATGGTTGAAGCAGATCGCCC-3'	5'-AAAAGCGGCCGCCTAGTATCTGCTTCTGCCTCCCC-3'
pCI-V5-RBMX	5'-AAAACTCGAGATGGTTGAAGCAGATCGCCC-3'	5'-AAAAGCGGCCGCCTAGTATCTGCTTCTGCCTCCCC-3'
pALice01-Flag-RBMX	5'-AAAACCATGGCTGACTACAAAGACGATGACGACAAGGTTGAAGCAGATCGCCCAGG-3'	5'-AAAAGGTACCTCACTAGTATCTGCTTCTGCCTCCCC-3'
pGEX4T1-RBMX RRM	5'-AAAAGAATTC ATGGTTGAAGCAGATCGCCC-3'	5'-AAAA GCGGCCGCCTA TTTGGTGGCTTGTTCCACCTT-3'
pGEX4T1-RBMX NTD	5'-AAAAGAATTCCCATCATTTGAAAGTGGTAGACGT-3'	5'-AAAAGCGGCCGCCTA TGGTGCATAATCTCTAGTATCACGAG-3'
pGEX4T1-RBMX RGG	5'-AAAAGAATTCCCACCACGAGATTATACTTACCGT-3'	5'-AAAAGCGGCCGCCTAGTATCTGCTTCTGCCTCCCC-3'
RBMX R369K, R373K, R377K	5'-CTACAGCAGTTCAAGCAAGGGAGCACCAAAAGGTGGTGGCAAGGGAGGAAGCCGATCTG-3'	5'-CAGATCGGCTTCCTCCCTTGCCACCACCTTTTGGTGCTCCCTTGCTTGAACTGCTGTAG-3'
RBMX R384K	5'-GGAGGAAGCCGATCTGATAAAGGGGGAGGC-3'	5'-GCCTCCCCCTTTATCAGATCGGCTTCCTCC-3'
RBMX	5'-TTGTCCCCAAGAGATGATGG-3'	5'-CACGATCACGACCATATCCA-3'
YBX1	5’-CCTGTGCAGGGAGAAGTGAT-3’	5’-TCTTCATTGCCGTCCTCTCT-3’
PPARγ	5’-GCTGTGCAGGAGATCACAGA-3’	5’-GGGCTCCATAAAGTCACCAA-3’
MAN1A2	5’-CACTGCCACCAGTCCCTATT-3’	5’-TGGTAGCACCCATTTGTGAA-3’
FKBP3	5’-TCCCAAAAAGGGAGATGTTG-3’	5’-GAGCTTCATCCCATCCTCTG-3’
PPDPF	5’-TGGCCACCCACGACTACTAC-3’	5’-GGACTTCCCGAAAAAGAAGC-3’
EphA8	5’-CCTGTGAGCTGGGCTTCTAC-3’	5’-TGTCCCATTCACACTGGAGA-3’
BACH1	5’-AGGCTGTTCAAGCAATTTGG-3’	5’-TGTGCATTGAATGGCAGTTT-3’
YTHDF1	5’-CCCGTCTACCTGCTCTTCAG-3’	5’-TGACCGGTTTGTTGTCGTTA-3’
ARFGAP1	5’-AGGTCCAGGGAGTCGGTAGT-3’	5’-GCTCAGCACTTCCAAAGGTC-3’
GMEB2	5’-CACCAGCTCAGAACCTGTCA-3’	5’-AAGGTCCCAACCCTGTTCTT-3’
SRSF7	5’-GTGTGGCGAAAAGGGACATT-3’	5’-GGAGATGCTGACCTTGACCT-3’
hnRNPL	5’-GGTCAGTCATACGGGTTGGA-3’	5’-CTTTCACAGAAGATGGCCGC-3’
CDK2	5’-TGAAGATGGACGGAGCTTGT-3’	5’-ACTGGAGGAGAGGGTGAGAT-3’
eIF5	5’-GTATTCGAAGGCTGCCAGTG-3’	5’-ACATGTTGCACTTCTGGCTG-3’
ZNF207	5’-CCCAGTCATTTTGCGGTGAA-3’	5’-TGTTGGTGCAGGTGGTCTAT-3’
UBXN4	5’-CTGGATTTGGAACTTGCCCC-3’	5’-ACTGAAGTCTGTGTGGGAGG-3’
C11orf58	5’-TTTGAGACCAGCCTGACCAA-3’	5’-AATGGGGTGATCTTGGCTCA-3’
eIF1α1	5'-AAAATGACCCACCAATGGAA-3'	5'-GCAGCATCACCAGACTTCAA-3'
SSRP1	5’-AAAGAGGAGTGGGATCGCAA-3’	5’-TCCCGAAGAGCTCTCATCAC-3’
PRPF40	5’-AACAAGCTGCTCCTCCGATA-3’	5’-TGAATCTGACCCCGATCGAG-3’
IPO5	5’-CACTGGTTGTCTTGGCTTCC-3’	5’-CTCGTGCATTTCTCCTTCCG-3’
PARG	5’-AAACACACGGAGCAGCTTTT-3’	5’-GCTTCTCTGGCCTGTTCATC-3’
eEF1A2	5’-CAGTTCACCTCCCAGGTCAT-3’	5’-GTTGTCCTCCAGCTTCTTGC-3’
β-actin	5’-CATCCGCAAAGACCTGTA-3’	5’-AGGGTGTAACGCAACTAAG-3’

## Sheet: Supplementary Table S7
Supplementary Table S7. List of siRNA sequences
siRNA	Sequence (Sense strand)
siControl	5’-GGCUACGUCCAGGAGCGCACC(dTdT)-3’
siRBMX-#1	5’-CGAUAGAGAUGGAUAUGGU(dTdT)-3’
siRBMX-#2	5’-GUGGAAGUCGAGACAGUUA(dTdT)-3’
siYBX1	5’-GGAACGGAUAUGGUUUCAU(dTdT)-3’
siP53	5’-GACUCCAGUGGUAAUCUAC(dTdT)-3’

## Sheet: Supplementary Table S8
Supplementary Table S8. List of antibodies
Antigen	Host	Source	Dilution	Cat. No	Applications
RBMX	Rabbit	Cell signaling	1:1000, 1:100, 1:100	#14794	Western blot & ICC & PLA
RBMX	mouse	Mybiosource	1:100	MBS6002137	PLA
eIF4A1	Rabbit	Cell signaling	1:1000	#2490	Western blot
eIF4E	Rabbit	Cell signaling	1:1000	#9742	Western blot
eIF4G	Rabbit	Cell signaling	1:1000, 1:100	#2858	Western blot & IP
eIF3F	Rabbit	BioLegend	1:3000, 1:100	638202	Western blot & PLA
eEF2	Rabbit	Abcam	1:1000	ab33523	Western blot
eIF3b	Goat	Santa Cruz	1:250, 1:50	SC-16377	Western blot & ICC
eIF3i	mouse	Santa Cruz	1:250, 1:25	SC-374156	Western blot & PLA
C-myc	Mouse	Santa Cruz	1:250	SC-40	Western blot
β-actin	Mouse	Abcam	1:3000	ab6276	Western blot
Flag	Mouse	Sigma-Aldrich	1:3000, 2ug	F1804	WB & IP
V5	Mouse	Invitrogen	1:3000, 2ug	R960-25	WB & IP
Ribosomal protein S3	Rabbit	Cell signaling	1:1500	#2579	Western blot
Ribosomal protein L13a	Rabbit	Cell signaling	1:1500	#2765	Western blot
Ribosomal protein L36a	mouse	Santa Cruz	1:3000	SC-100831	Western blot
Ribosomal protein L26	Rabbit	Cell signaling	1:3000	#5400	Western blot
RCK / DDX6	Rabbit	Bethyl Laboratories	1:1000	A300-461A	IHC
Puromycin	mouse	Merck Millipore	1:3000	MABE343	Western blot
phospho-ERK1/2 (Thr202/Tyr204)	Rabbit	Cell signaling	1:1000	#4370	Western blot
Histone H3	Rabbit	Cell signaling	1:3000	#4499	Western blot
YBX1	Rabbit	Cell signaling	1:1000	#4202	Western blot & IHC
PARG	Rabbit	Cell signaling	1:1000	#66564	Western blot & IHC
BACH1	Rabbit	abclonal	1:5000	A22230	Western blot & IHC
FKBP3	Rabbit	Invitrogen	1:3000	PA5-19483	Western blot & IHC
LaminB1	Rabbit	Cell signaling	1:2000	#12586	Western blot
His	mouse	Abcam	1:500	ab18184	Western blot
GST	mouse	Santa Cruz	1:500	SC-138	Western blot
Symmetric dimethyl Arginine	Rabbit	Cell signaling	1:1000	#13222	Western blot
p21	Rabbit	Cell signaling	1:1000	#2947	Western blot
p53	mouse	Santa Cruz	1:500	SC-126	Western blot
ki67	mouse	Cell signaling	1:1000	#9449	Western blot
HA	Rabbit	Santa Cruz	1:500, 2ug	SC-805	Western blot
